# Supplementary material for: Cost-effectiveness of ranibizumab and bevacizumab for age-related macular degeneration: 2-year findings from the IVAN randomised trial
Source: PubMed Central journal article supplement — BMJ Open. 2014 Jul 29;4(7):e005094. doi: 10.1136/bmjopen-2014-005094 (PMC4120317; doi:10.1136/bmjopen-2014-005094), 2014-07-29
Supplement: bmjopen-2014-005094.draft_revisions.pdf [file bmjopen-2014-005094.draft_revisions.pdf]

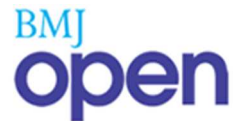

**Cost-effectiveness of ranibizumab and bevacizumab for age-related macular degeneration: 2-year findings from the IVAN randomised trial**

|                                 |                                                                                                                                                                                                                                                                                                                                                                                                                                                                                                                                                                                                                                                                                                                                                                                                                                                                                                                                                                                                                 |
|---------------------------------|-----------------------------------------------------------------------------------------------------------------------------------------------------------------------------------------------------------------------------------------------------------------------------------------------------------------------------------------------------------------------------------------------------------------------------------------------------------------------------------------------------------------------------------------------------------------------------------------------------------------------------------------------------------------------------------------------------------------------------------------------------------------------------------------------------------------------------------------------------------------------------------------------------------------------------------------------------------------------------------------------------------------|
| Journal:                        | <i>BMJ Open</i>                                                                                                                                                                                                                                                                                                                                                                                                                                                                                                                                                                                                                                                                                                                                                                                                                                                                                                                                                                                                 |
| Manuscript ID:                  | bmjopen-2014-005094                                                                                                                                                                                                                                                                                                                                                                                                                                                                                                                                                                                                                                                                                                                                                                                                                                                                                                                                                                                             |
| Article Type:                   | Research                                                                                                                                                                                                                                                                                                                                                                                                                                                                                                                                                                                                                                                                                                                                                                                                                                                                                                                                                                                                        |
| Date Submitted by the Author:   | 19-Feb-2014                                                                                                                                                                                                                                                                                                                                                                                                                                                                                                                                                                                                                                                                                                                                                                                                                                                                                                                                                                                                     |
| Complete List of Authors:       | Dakin, Helen; Health Economics Research Centre, University of Oxford, Nuffield Department of Population Health<br>Wordsworth, Sarah; Health Economics Research Centre, University of Oxford, Nuffield Department of Population Health<br>rogers, chris; University of Bristol, Clinical Science South Bristol<br>Abangma, Giselle; Swiss Re Services Ltd, Research and Development<br>Raftery, James; Southampton University, WIHRD School of Medicine<br>Harding, Simon; Department of Eye and Vision Science, University of Liverpool, Institute of Ageing and Chronic Disease<br>Lotery, Andrew; University of Southampton<br>Downes, Susan; Oxford University Hospitals, Oxford Eye Hospital<br>Chakravarthy, Usha; Queens University of Belfast, Ophthalmology<br>Reeves, Barnaby; University of Bristol, Bristol Heart Institute<br>on behalf of the, IVAN Study Investigators; The IVAN study investigators are listed online (available at <a href="http://aaojournal.org">http://aaojournal.org</a> ), |
| <b>Primary Subject Heading</b>: | Health economics                                                                                                                                                                                                                                                                                                                                                                                                                                                                                                                                                                                                                                                                                                                                                                                                                                                                                                                                                                                                |
| Secondary Subject Heading:      | Ophthalmology                                                                                                                                                                                                                                                                                                                                                                                                                                                                                                                                                                                                                                                                                                                                                                                                                                                                                                                                                                                                   |
| Keywords:                       | Neovascular age-related macular degeneration (nAMD), vascular endothelial growth factor (VEGF) inhibitors, trial-based economic evaluation, cost-utility analysis, cost-minimisation analysis, cost-effectiveness                                                                                                                                                                                                                                                                                                                                                                                                                                                                                                                                                                                                                                                                                                                                                                                               |
|                                 |                                                                                                                                                                                                                                                                                                                                                                                                                                                                                                                                                                                                                                                                                                                                                                                                                                                                                                                                                                                                                 |

SCHOLARONE™  
Manuscripts

# Cost-effectiveness of ranibizumab and bevacizumab for age-related macular degeneration: 2-year findings from the IVAN randomised trial

**Authors:** Helen A Dakin *Senior Researcher*,<sup>1</sup> Sarah Wordsworth *University Research Lecturer*,<sup>1</sup> Chris A Rogers *Reader in Medical Statistics*,<sup>2</sup> Giselle Abangma *Health Research Analyst*,<sup>3</sup> James Raftery *Professor of Health Technology Assessment*,<sup>4</sup> Simon P Harding *Professor of Clinical Ophthalmology*,<sup>5</sup> Andrew J Lotery *Professor of Ophthalmology*,<sup>6</sup> Susan M Downes *Consultant Ophthalmologist*,<sup>7</sup> Usha Chakravarthy *Clinical Professor*,<sup>8†</sup> Barnaby C Reeves *Professor of Health Services Research*,<sup>2†</sup> on behalf of the IVAN Study Investigators\*

\* The IVAN study investigators are listed online (available at <http://aaojournal.org>) in Appendix 1 of reference <sup>1</sup>.

† These authors contributed equally to the manuscript and the trial.

<sup>1</sup> Health Economics Research Centre, Nuffield Department of Population Health, University of Oxford, Old Road Campus, Headington, Oxford, OX3 7LF, UK

<sup>2</sup> Clinical Trials and Evaluation Unit, School of Clinical Sciences, University of Bristol, Bristol, BS2 8HW, UK.

<sup>3</sup> Swiss Re Services Ltd, Research and Development. London EC3A 8EP, UK

<sup>4</sup> Wessex Institute for Health Research and Development, University of Southampton, SO16 7NS, UK

<sup>5</sup> Department of Eye and Vision Science, Institute of Ageing and Chronic Disease, University of Liverpool, Daulby Street, Liverpool, L69 3GAL, UK.

<sup>6</sup> Academic Unit of Clinical and Experimental Sciences, Faculty of Medicine, University of Southampton, SO16 6YD, UK

<sup>7</sup> Oxford Eye Hospital, Oxford University Hospitals NHS Trust, Oxford, OX3 9DU, UK.

<sup>8</sup> Centre for Experimental Medicine, The Queen's University of Belfast, Belfast, BT12 6BA, UK.

**Running header:** Cost-effectiveness of ranibizumab and bevacizumab for AMD

## Guarantor and corresponding author:

Helen Dakin, Health Economics Research Centre, Nuffield Department of Population Health, University of Oxford, Old Road Campus, Headington, Oxford, UK. Tel: +44 (0) 1865 289422; Fax: +44 (0) 1865 289271; Email: [helen.dakin@dph.ox.ac.uk](mailto:helen.dakin@dph.ox.ac.uk)

**Word count:** 4273

**Key words**

Neovascular age-related macular degeneration (nAMD); vascular endothelial growth factor (VEGF) inhibitors; trial-based economic evaluation; cost-utility analysis; cost-minimisation analysis; cost-effectiveness.

For peer review only

## Abstract

**Objective:** To assess the incremental cost and cost-effectiveness of continuous and discontinuous regimens of bevacizumab (Avastin®) and ranibizumab (Lucentis®) for neovascular age-related macular degeneration (nAMD) from a UK National Health Service perspective.

**Design:** A within-trial cost-utility analysis with two-year time horizon, based on a multi-centre factorial, non-inferiority randomised controlled trial.

**Setting:** 23 hospital ophthalmology clinics.

**Participants:** 610 patients aged  $\geq 50$  years with untreated nAMD in the study eye.

**Interventions:** 0.5 mg ranibizumab or 1.25 mg bevacizumab given continuous (monthly) or discontinuous (as-needed) for two years.

**Main Outcome Measures:** Quality-adjusted life-years (QALYs).

**Results:** Total two-year costs ranged from £3,002/patient (\$4,700; 95% CI: £2,601 to £3,403) for discontinuous bevacizumab to £18,590/patient (\$29,106; 95% CI: £18,258 to £18,922) for continuous ranibizumab. Ranibizumab was significantly more costly than bevacizumab for both continuous treatment (+£14,989/patient [\$23,468; 95% CI: £14,522 to £15,456;  $p < 0.001$ ]) and discontinuous treatment (+£8,498 [\$13,305]; 95% CI: £7,700 to £9,295;  $p < 0.001$ ), with negligible difference in QALYs. Continuous ranibizumab would only be cost-effective compared with continuous bevacizumab if the NHS were willing to pay £3.5 million (\$5.5 million) per additional QALY gained. Patients receiving continuous bevacizumab accrued higher total costs (+£599 [\$938] 95% CI: £91 to £1,107;  $p = 0.021$ ) than those receiving discontinuous bevacizumab, but also accrued non-significantly more QALYs (+0.020; 95% CI: -0.032 to 0.071;  $p = 0.452$ ). Continuous bevacizumab therefore cost £30,220 (\$47,316) per QALY gained compared with discontinuous bevacizumab. However, bootstrapping demonstrated that if the NHS is willing to pay £20,000/QALY gained, there is a 37% chance that continuous bevacizumab is cost-effective compared with discontinuous bevacizumab.

**Conclusions:** Ranibizumab is not cost-effective compared with bevacizumab, being substantially more costly and producing little/no QALY gain. Discontinuous bevacizumab is likely to be the most cost-effective of the four treatment strategies evaluated in IVAN, although there is a 37% chance that continuous bevacizumab is cost-effective.

**Trial registration:** ISRCTN92166560

### Article summary: Strengths and limitations of this study

- We conducted a trial-based economic evaluation based on high-quality data on costs and quality of life prospectively collected within a randomised trial.
- This demonstrated that bevacizumab would achieve substantial cost-savings over ranibizumab with negligible differences in quality of life. In England, switching patients to bevacizumab could save at least £102 (\$160) million per year. However, bevacizumab is not currently licensed for neovascular age-related macular degeneration (nAMD).
- Our study is the first to evaluate the cost-effectiveness of alternative treatment regimens for nAMD.
- Of the strategies for the treatment of nAMD evaluated in this trial, we found discontinuous (as needed) bevacizumab to be the least costly and most cost-effective. However, there was substantial uncertainty around this finding and sensitivity analyses suggested that the cost-effectiveness of using continuous (monthly) treatment rather than discontinuous treatment may vary between centres.

## Introduction

Neovascular age-related macular degeneration (nAMD) is a common disorder of the ageing eye and if left untreated leads to severe central visual impairment. The current standard of care is treatment with biologicals that bind to or inhibit vascular endothelial growth factor (VEGF). Biologicals need to be injected into the vitreous cavity of the eye at 4-8 week intervals. However, the first treatment convincingly shown to be effective in preventing vision loss (ranibizumab, Lucentis®<sup>2,3</sup>) is expensive (£742/dose<sup>4</sup>). Another anti-VEGF biological, bevacizumab (Avastin®), is licensed to treat bowel cancer and has been used to treat nAMD, using smaller doses that cost much less than ranibizumab. Small non-randomised studies on bevacizumab have reported outcomes that were as good as those achievable with ranibizumab.<sup>5</sup> Comparative effectiveness randomised controlled trials (RCTs) of ranibizumab versus bevacizumab were therefore needed to provide unbiased estimates of relative efficacy and safety. The UK Inhibition of VEGF in Age-related choroidal Neovascularisation (IVAN) trial<sup>1,6</sup> and the US Comparison of Age-related macular degeneration Treatments Trials (CATT)<sup>7,8</sup> were amongst the first such trials to report findings.

Two-year IVAN results demonstrated that ranibizumab and bevacizumab produced similar improvements in visual function, with no significant difference in arteriothrombotic events or hospital admissions for heart failure, which have previously been linked with anti-VEGF therapy.<sup>6</sup> IVAN also compared discontinuous (as-needed) treatment against continuous monthly injections. Continuous and discontinuous treatment produced similar improvements in visual function, although mortality was significantly lower with continuous treatment ( $p=0.05$ ).

Given the rising demands for healthcare and limited budgets, it is important to assess cost-effectiveness as well as the clinical effectiveness and safety of medical interventions. Evidence on incremental cost and cost-effectiveness is of particular importance in nAMD, owing to the potential savings and health implications of either reducing treatment frequency or substituting a much cheaper alternative (bevacizumab) for a more expensive drug (ranibizumab). Although ranibizumab costs many times more than bevacizumab, it is important to consider all relevant costs and assess cost-effectiveness to determine whether the more expensive therapy has added

1  
2  
3 health benefits that justify the additional costs or lead to savings that offset the price  
4 difference.  
5  
6

7  
8 A recent systematic review<sup>9</sup> identified nine economic evaluations of ranibizumab  
9 and three of bevacizumab. Six further studies evaluating ranibizumab<sup>10-15</sup> and one  
10 evaluating bevacizumab<sup>11</sup> have since been published. Most studies found ranibizumab  
11 to be cost-effective versus other treatments, such as pegaptanib. Four studies  
12 concluded that bevacizumab was likely to be cost-effective compared with  
13 ranibizumab, but relied on observational data<sup>11 15</sup> or assumptions about relative  
14 efficacy.<sup>16 17</sup> We are unaware of any other RCT that has estimated the cost-  
15 effectiveness of bevacizumab or any study that evaluated the cost-effectiveness of  
16 continuous versus discontinuous treatment.  
17  
18  
19  
20  
21  
22

23  
24 A key objective of the IVAN trial was to assess the incremental cost and  
25 incremental cost-effectiveness of continuous and discontinuous regimens of  
26 bevacizumab and ranibizumab in nAMD from the perspective of the UK National  
27 Health Service (NHS). The results of these analyses are reported here.  
28  
29  
30  
31  
32  
33

## 34 **Methods**

35  
36 The study was based on the two-year results from the IVAN trial  
37 (ISRCTN92166560), which provided high-quality data on resource use and outcomes  
38 and comprises the only UK trial directly comparing these interventions. Trial design  
39 and methods have been described previously<sup>1 6</sup>; in brief this was a factorial, multi-  
40 centre non-inferiority trial in which 610 patients not previously treated for nAMD in  
41 their study eyes were randomised to either bevacizumab (0.5 mg/dose) or ranibizumab  
42 (1.25 mg/dose) and to either discontinuous treatment or continuous monthly injections  
43 for two years. Discontinuous treatment comprised an initial course of three monthly  
44 injections, followed by further courses of three injections given monthly if pre-  
45 specified clinical and optical coherence tomography (OCT) re-treatment criteria were  
46 met. The economic evaluation took a two-year time horizon to estimate within-trial  
47 cost-effectiveness. Following UK guidelines,<sup>18</sup> we took the perspective of the UK  
48 NHS, which excludes costs incurred by patients and their families or employers.  
49  
50  
51  
52  
53  
54  
55  
56  
57  
58  
59  
60

1  
2  
3 Detailed methods and additional results will be published as a monograph in *Health*  
4 *Technology Assessment*.  
5  
6  
7

8 Since IVAN was factorial, it was important to consider the likelihood of  
9 interactions: that is, whether the differences in costs and/or quality of life between  
10 bevacizumab and ranibizumab differ between treatment regimens. Although no  
11 interactions were anticipated for visual acuity,<sup>1</sup> large interactions between drug and  
12 treatment regimen were expected for costs and cost-effectiveness, since reducing the  
13 number of injections would have a proportionately greater effect on drug costs for  
14 ranibizumab than for less expensive bevacizumab. Interactions for quality of life or  
15 costs are also possible if the number of injections required for discontinuous treatment  
16 differed between drugs. We therefore estimate the mean costs and mean quality-  
17 adjusted life-years (QALYs) for each of the four treatment combinations and interpret  
18 the results based on four pair-wise comparisons:  
19  
20  
21  
22  
23  
24  
25

- 26 • Continuous ranibizumab versus discontinuous ranibizumab;
- 27 • Continuous bevacizumab versus discontinuous bevacizumab;
- 28 • Continuous ranibizumab versus continuous bevacizumab;
- 29 • Discontinuous ranibizumab versus discontinuous bevacizumab.
- 30  
31  
32  
33  
34

35 We report two forms of economic evaluation. Comparisons between drugs were  
36 based on cost-minimisation analysis, which compares costs between treatments that  
37 are assumed to have identical health effects.<sup>19</sup> Cost-minimisation analysis is  
38 appropriate only if the difference in cost is so large that no plausible difference in  
39 efficacy could cause the more costly treatment to be cost-effective.<sup>20 21</sup> This approach  
40 is justified for the comparisons between drugs because the large difference in drug  
41 costs was inevitably going to be the main influence on the incremental cost-  
42 effectiveness of ranibizumab versus bevacizumab. We therefore pre-specified that  
43 ranibizumab and bevacizumab would be compared using cost-minimisation analysis  
44 unless ranibizumab-treated patients accrued  $\geq 0.05$  more QALYs than those receiving  
45 bevacizumab. By contrast, we used cost-utility analysis, in which health outcomes are  
46 measured in QALYs, to compare continuous and discontinuous treatment, where  
47 incremental costs are smaller.  
48  
49  
50  
51  
52  
53  
54  
55  
56  
57  
58  
59  
60



### *Measurement and valuation of resource use*

Our base case analysis also focused on resource use associated with the study eye or associated with adverse events (AEs) or serious adverse events (SAEs) that were “*expected*”: i.e. previously linked to anti-VEGF treatment (Appendix). Concomitant medications, hospitalisations and ambulatory consultations that were neither associated with the study eye nor attributable to expected AEs or expected SAEs were excluded to avoid including episodes of high healthcare resource use unrelated to treatment (e.g. renal failure or cancer), which might otherwise have swamped the main effect of treatment on costs.<sup>22</sup>

After enrolment, participants were monitored for disease activity on a monthly basis with visual acuity assessments, colour fundus imaging and OCT. Fundus fluorescein angiography (FFA) was undertaken at specified visits and when OCT was insufficient to reach a decision on disease activity. A pre-specified algorithm was used to determine the need for re-treatment. Patients allocated to discontinuous treatment began a new course of three monthly injections whenever they met re-treatment criteria. However, costing analyses excluded protocol-driven resource use; in particular, we assumed that patients would not require colour fundus photography, OCT or FFA unless this would affect treatment decisions. As such, patients on discontinuous treatment were assumed not to require these investigations at the second or third visit in a course of three injections, when treatment was mandated (Figure 1). Similarly, patients on continuous treatment were assumed to require monitoring consultations only once every three months, on the grounds that ophthalmologists would want information about disease progression periodically, irrespective of whether treatment decisions are required.

Micro-costing was used to estimate the cost of injection and monitoring consultations since the available national average costs<sup>23 24</sup> are not nAMD-specific and do not differentiate between consultations for monitoring and intravitreal drug delivery. Staff at 13 of the 23 IVAN centres completed questionnaires on overheads, the cost of setting up clinic facilities and equipment and/or the staff required to run injection and monitoring clinics.

1  
2  
3 The drug acquisition cost for ranibizumab was the NHS list price (£742.17<sup>4</sup>) and  
4 that for bevacizumab was the price typically charged by the not-for-profit NHS  
5 provider used in the trial (£49/prefilled syringe). All concomitant medications,  
6 contacts with medical professionals and hospitalisations were recorded at each  
7 monthly clinic visit. Concomitant medications applied to the study eye or indicated  
8 for any expected SAE/AE were valued using list prices.<sup>4</sup> Costs of other medications,  
9 including those applied to the fellow eye, were excluded from the analysis. Unit costs  
10 for consultations with general practitioners, district or general practice nurses and  
11 hospital staff outside IVAN clinics were obtained from routine sources.<sup>24 25</sup> These  
12 costs were applied to ambulatory consultations that were either related to the eye or  
13 that occurred within 30 days of an expected SAE/AE. Hospital stays linked to  
14 expected SAEs were valued using the mean cost per bed-day for associated HRGs.<sup>24</sup>  
15  
16  
17  
18  
19  
20  
21  
22  
23

24 Resource use data and unit costs were combined to estimate quarterly costs of:  
25 bevacizumab/ranibizumab; drug administration and monitoring consultations; and  
26 hospitalisations, ambulatory consultations and medication changes for expected  
27 SAEs/AEs. Value added tax (VAT) was excluded from the economic evaluation and  
28 included in budget impact estimates, following guidelines.<sup>18</sup> Costs are reported in  
29 2011 pounds sterling, accompanied by equivalents in US dollars (exchange rate:  
30 \$1.57/pound).  
31  
32  
33  
34  
35  
36  
37

### 38 ***Measurement and valuation of health benefits***

39 The three-level EQ-5D questionnaire<sup>26</sup> was administered at baseline, 3, 12 and 24  
40 months, and (if the patient was willing and able to do so) at study exit, after any SAE  
41 and after a drop in visual acuity in the study eye of  $\geq 15$  letters on the Early Treatment  
42 Diabetic Retinopathy Study vision chart between two consecutive visits (referred to  
43 subsequently as a 'reduction in visual acuity'). The Health Utilities Index  
44 questionnaire version 3 (HUI3) was administered at the same timepoints and used in  
45 sensitivity analyses; EQ-5D comprised the utility primary measure following UK  
46 guidelines.<sup>18</sup> Patients self-completed large-print EQ-5D questionnaires, with  
47 assistance from study nurses where necessary; responses were valued using the UK  
48 time-trade-off tariff to give "utilities".<sup>26</sup>  
49  
50  
51  
52  
53  
54  
55  
56  
57  
58  
59  
60

1  
2  
3 Missing utility data were imputed using multiple imputation,<sup>27</sup> which avoids bias  
4 and enables analysis of the whole sample. Multiple imputation was conducted using  
5 the ice command<sup>28</sup> (version 1.9.4) in Stata Version 12 (StataCorp, College Station,  
6 TX).  
7  
8  
9

10  
11 QALYs for each participant were calculated as the area under the curve. We  
12 assumed that utility changed linearly between consecutive EQ-5D measurements in  
13 the absence of SAEs. Since linear changes are unlikely for patients with SAEs, we  
14 assumed that SAEs and reductions in visual acuity caused a sudden drop in utility on  
15 the day of onset, followed by a linear rise as the patient recovered; the rate of this  
16 linear rise was estimated using mixed models (Appendix).  
17  
18  
19  
20  
21

### 22 23 *Statistical methods*

24 Linear regression models were used to estimate the effect of drug and treatment  
25 regimen on QALYs, drug costs, administration/monitoring costs and  
26 medication/medical service use in each three-month period or “quarter” (Appendix).  
27 Interactions between drug and treatment regimen were included in the models for  
28 quarters 2-8 if they were either statistically significant or were larger than the main  
29 effect for drug or for treatment regimen. The analysis of QALYs, drug costs and  
30 medication/medical service use in quarters 2-8 therefore took account of interactions,  
31 while drug and treatment regimen were assumed to have additive effects on  
32 administration/monitoring costs. A variant on Kaplan-Meier sample averaging<sup>29 30</sup>  
33 was used to account for patients withdrawing early from the trial and exclude  
34 differences in mortality unrelated to treatment; regression predictions of quarterly  
35 costs and QALYs were weighted by the proportion of patients alive at the start of each  
36 quarter. Costs accrued in Year 2 were discounted at 3.5% to allow for time preference  
37 (i.e. the tendency to prefer benefits sooner and costs later).<sup>18</sup> Uncertainty around  
38 quarterly costs and QALYs was quantified by estimating models separately for 130  
39 nonparametric bootstrap draws on each of 100 datasets generated in multiple  
40 imputation to capture the uncertainty around imputed utilities. The appendix gives  
41 further details of the statistical methodology.  
42  
43  
44  
45  
46  
47  
48  
49  
50  
51  
52  
53  
54  
55  
56  
57  
58  
59  
60

### ***Presentation of results and uncertainty***

Incremental cost-effectiveness ratios (ICERs) were calculated by dividing the difference in cost between two study arms by the difference in QALYs. Results were interpreted assuming that the UK NHS would be willing to pay £20,000 to gain one QALY (a £20,000/QALY “ceiling ratio”).<sup>31</sup> We also present net benefits for each of the four treatment arms: net benefit equals total QALYs multiplied by the ceiling ratio, minus total costs. Uncertainty around ICERs is presented as cost-effectiveness acceptability curves, which plot the probability of each of the four treatment groups having the highest net benefits (i.e. being most cost-effective) at a range of ceiling ratios.

Sensitivity analyses evaluated the impact of changing the costs (e.g. halving the cost of ranibizumab), methods (e.g. taking a one-year time horizon) and assumptions (e.g. including the costs of all SAEs, not just ‘expected’ SAEs).

## **Results**

### ***QALYs and quality of life***

The number of QALYs accrued over the two-year trial period did not differ significantly between bevacizumab and ranibizumab, or between continuous and discontinuous treatment ( $p \geq 0.381$ ; Table 1). Patients randomised to continuous treatment accrued non-significantly more QALYs than those randomised to discontinuous treatment (mean difference: 0.020 [95% CI: -0.032, 0.071] for bevacizumab,  $p=0.452$  and 0.026 [95% CI: -0.032, 0.085] for ranibizumab,  $p=0.381$ ), while differences between ranibizumab and bevacizumab were negligible.

### ***Resource use and costs***

Patients receiving continuous treatment received a mean of 22 injections, while those on discontinuous treatment received 13. Consequently, drug costs differed substantially between continuous and discontinuous treatment (Table 1;  $p < 0.001$ ), as well as between ranibizumab and bevacizumab ( $p < 0.001$ ). Since reducing treatment frequency produces larger savings for ranibizumab than for bevacizumab, there were significant interactions between drug and treatment regimen for drug cost ( $p < 0.001$ ).

1  
2  
3  
4  
5 Administration of bevacizumab or ranibizumab cost £61 (\$96; standard deviation,  
6 SD: £14) per injection, while each consultation for monitoring cost £72 (\$113; SD:  
7 £41), plus £39 (\$61; SD: £16) for each FFA. Administering intravitreal injections and  
8 monitoring disease progression/remission cost between £1,825 and £1,970 per patient  
9 over the two-year trial period (Table 1). Discontinuous treatment reduced the number  
10 of injections required, but increased the number of monitoring consultations needed to  
11 assess disease status against retreatment criteria, since we assumed that OCT would  
12 only be done when it would inform treatment decisions. Since continuous treatment  
13 requires, on average, nine more injections ( $p < 0.001$ ), but avoids only six monitoring  
14 visits ( $p < 0.001$ ), drug administration and monitoring costs were higher with  
15 continuous treatment than discontinuous treatment (mean difference: £130 per patient  
16 (\$204); 95% CI: £20, £239;  $p = 0.021$ ), with no significant difference between  
17 bevacizumab and ranibizumab ( $p = 0.80$ ).

18  
19  
20  
21  
22  
23  
24  
25  
26  
27  
28 The cost of medication changes, hospitalisations and ambulatory consultations  
29 associated with expected SAEs and expected AEs was relatively small (mean: £469  
30 [£735] per patient), but varied substantially between patients (95 percentile range: £0,  
31 £1,401). There was no significant difference in such costs between drugs or treatment  
32 regimens ( $p \geq 0.163$ ).

33  
34  
35  
36  
37  
38 Taking account of the drug cost, drug administration/monitoring and  
39 medication/medical service use, the mean total cost per patient over the two-year trial  
40 ranged from £18,590 (\$29,119) for continuous ranibizumab to £3,002 (\$4,702) for  
41 discontinuous bevacizumab (Table 1). Drug cost accounted for 80-88% of the total  
42 cost for patients randomised to ranibizumab and 21-30% of the cost for patients  
43 randomised to bevacizumab. Drug administration and monitoring accounted for 54-  
44 61% of the costs accrued by patients randomised to bevacizumab and 10-15% of costs  
45 for those randomised to ranibizumab.

#### 52 53 ***Base case comparison between ranibizumab and bevacizumab***

54 Since the difference in mean QALYs between ranibizumab and bevacizumab was less  
55 than the pre-specified non-inferiority margin (0.05 QALYs), cost-minimisation  
56 analysis was used to compare the two drugs on the basis of cost alone. Overall,  
57  
58  
59  
60

1  
2  
3 continuous ranibizumab cost £14,989 more per patient (\$23,476 [95% CI: £14,522,  
4 £15,456], Table 1) than continuous bevacizumab over the two-year trial period  
5 (p<0.001). Discontinuous ranibizumab cost £8,498 more per patient (\$13,308 [95%  
6 CI: £7,700, £9,295], p<0.001) compared with discontinuous bevacizumab.  
7  
8 Bootstrapping analyses estimated the probability that switching from ranibizumab to  
9 bevacizumab would save money and found that this exceeds 99.9%.  
10  
11  
12

### 13 14 ***Base case comparison between continuous and discontinuous treatment***

15  
16 Overall, using continuous rather than discontinuous treatment increased costs by  
17 £7,090 (\$11,102 [95% CI: £6,337, £7,844], p<0.001) for ranibizumab and £599 (\$938  
18 [95% CI: £91, £1,107], p=0.021) for bevacizumab.  
19  
20  
21

22  
23 However, patients randomised to continuous bevacizumab also accrued non-  
24 significantly more QALYs than those randomised to discontinuous bevacizumab  
25 (Table 1; p=0.452). In line with best practice,<sup>19</sup> we took account of the non-  
26 significant differences in QALYs and allowed for the joint distribution of costs and  
27 QALYs, since assuming no difference in health outcomes can introduce bias and give  
28 misleading conclusions.<sup>20 21</sup> Dividing the difference in cost by the difference in  
29 QALYs suggests that continuous bevacizumab costs £30,220 (\$47,316) per additional  
30 QALY gained compared with discontinuous bevacizumab. This ICER is somewhat  
31 higher than the £20,000 (\$31,000) per QALY "ceiling ratio" below which the NHS  
32 generally considers treatments to be cost-effective.<sup>31</sup> However, the imprecision around  
33 QALY differences means that there is substantial uncertainty around this ICER.  
34  
35 Bootstrapping demonstrated that there is a 37% chance that continuous bevacizumab  
36 is cost-effective compared with discontinuous bevacizumab at a £20,000/QALY  
37 ceiling ratio, which increases to 50% at £30,000/QALY.  
38  
39  
40  
41  
42  
43  
44  
45  
46  
47

48 Continuous ranibizumab cost £270,217 (\$423,074) per QALY gained compared  
49 with discontinuous ranibizumab. Due to the substantial savings possible by giving  
50 ranibizumab less frequently, we can be >99.99% confident that continuous  
51 ranibizumab is poor value for money compared with discontinuous ranibizumab at a  
52 £20,000/QALY ceiling ratio.  
53  
54  
55  
56  
57  
58  
59  
60

### ***Base case four-way comparison***

It is also informative to consider the four trial treatment groups as four mutually-exclusive alternative strategies for managing nAMD. Framing the decision in this way demonstrates that discontinuous bevacizumab is the most cost-effective treatment strategy evaluated in IVAN, generating higher net benefits than the other three treatment strategies (Table 1), where net benefit equals QALYs multiplied by ceiling ratio (in this case £20,000/QALY) minus costs. Continuous ranibizumab would only be cost-effective compared with continuous bevacizumab if the NHS were willing to pay £3.5 million (\$5.5 million) per additional QALY gained. Discontinuous ranibizumab is not cost-effective at any ceiling ratio, as it is more costly and less effective than continuous or discontinuous bevacizumab.

However, there remains substantial uncertainty around incremental QALY gains. This is illustrated by the cost-effectiveness acceptability curves plotting the probability of each treatment being the most cost-effective of the four strategies at different ceiling ratios (Figure 2). This demonstrates that, although we can be 98% confident that discontinuous bevacizumab is less costly than continuous bevacizumab, our confidence in the conclusion that discontinuous bevacizumab has highest net benefits decreases rapidly as the value we place on the small, non-significant QALY gains increases. At a £20,000/QALY ceiling ratio, there is a 63% probability that discontinuous bevacizumab is the most cost-effective strategy considered in IVAN and a 37% probability that continuous bevacizumab is the most cost-effective. By contrast, the probability of either continuous or discontinuous ranibizumab being the most cost-effective strategy for managing nAMD is <1% unless the NHS were willing to pay more than £100,000/QALY gained.

### ***Sensitivity analyses***

Sensitivity analyses demonstrated that the conclusions are very robust to changes in the assumptions and methods used to measure costs and utilities and conduct the analysis (Figure 3). Notably, no sensitivity analysis changed the conclusion that ranibizumab is not cost-effective compared with bevacizumab. However, three sensitivity analyses changed the conclusion that continuous bevacizumab is not cost-effective compared with discontinuous bevacizumab: assuming that FFA is only conducted at baseline, not at any subsequent monitoring consultation; measuring

1  
2  
3 quality of life using HUI3 rather than EQ-5D; and using unadjusted Kaplan-Meier  
4 estimates of the probability of surviving at any point in time to account for censoring,  
5 rather than excluding differences in deaths that were unrelated to study medication  
6 (see Appendix).  
7  
8  
9

10  
11 Threshold analyses demonstrated that the price of ranibizumab would need to be  
12 reduced to £63.46 per dose (a 91% price reduction) in order for continuous  
13 ranibizumab to be cost-effective compared with continuous bevacizumab at a  
14 £20,000/QALY ceiling ratio.  
15  
16  
17  
18  
19

## 20 21 Discussion

22 This study demonstrates that in a UK setting, we can be >99% confident that  
23 ranibizumab represents very poor value for money compared with bevacizumab at the  
24 £20,000 (\$31,000) per QALY ceiling ratio used within NHS decision-making.<sup>31</sup>  
25 Continuous ranibizumab would only be cost-effective compared with continuous  
26 bevacizumab if the NHS were willing to pay >£3.5 (\$5.5) million/QALY gained.  
27 Furthermore, our analysis also shows that giving discontinuous bevacizumab, rather  
28 than discontinuous ranibizumab could save the UK NHS £8,498 (\$13,341) per patient  
29 treated, with little or no impact on the health gains from treatment. If the 17,295 eyes  
30 requiring anti-VEGF therapy each year in England<sup>32</sup> were switched from  
31 discontinuous ranibizumab to discontinuous bevacizumab, the NHS could save at  
32 least £102 (\$160) million per year (including 20% VAT) based on the treatment  
33 regimens evaluated in IVAN. It remains controversial as to whether a drug  
34 (bevacizumab) that has not been approved and licensed for nAMD by regulatory  
35 agencies should be used when a licensed drug (ranibizumab) is available. In the UK,  
36 clinicians may prescribe unlicensed medications within approved research projects,  
37 when no suitable medicine is licensed, or when the licensed alternative is  
38 unavailable,<sup>33</sup> although prescribing on cost grounds is not mentioned. By contrast, in  
39 the US, ophthalmologists use bevacizumab freely.<sup>34</sup> National guidance (rather than  
40 local hospital/clinician policies) is therefore needed in the UK to direct the choice  
41 between bevacizumab and ranibizumab. CATT and IVAN provide robust data to  
42 guide regulators in this decision, demonstrating that ranibizumab and bevacizumab  
43  
44  
45  
46  
47  
48  
49  
50  
51  
52  
53  
54  
55  
56  
57  
58  
59  
60



1  
2  
3 have comparable effects on vision and similar safety profiles,<sup>6 7</sup> but that ranibizumab  
4 costs £3.5 million per QALY compared with bevacizumab.  
5  
6

7  
8 The base case analysis found that continuous bevacizumab cost £30,220  
9 (\$47,445) per QALY gained compared with discontinuous bevacizumab, suggesting  
10 that discontinuous bevacizumab is the most cost-effective strategy evaluated in IVAN  
11 if the NHS is willing to pay up to £20,000/QALY gained. However, there remains  
12 substantial uncertainty around this conclusion and there is a 37% chance that  
13 continuous bevacizumab is cost-effective. The finding of non-significantly higher  
14 QALYs with continuous treatment contradicts our prior hypothesis that avoiding  
15 monthly injections might improve quality of life, although the observed difference  
16 could be due to chance. Nonetheless, discontinuous bevacizumab would remain the  
17 most cost-effective strategy even if there were no difference in quality of life between  
18 treatment regimens. Other considerations may affect the choice of anti-VEGF delivery  
19 model. In particular, since discontinuous treatment requires regular clinical review  
20 and access to retinal imaging, it may be more practical to provide treatment every  
21 month, with monitoring restricted to specified points in time (e.g. six or 12 months  
22 after initiation of therapy). Indeed the label for the newest anti-VEGF (aflibercept)  
23 incorporates a limited clinical monitoring regime.<sup>35</sup> The discontinuous treatment  
24 regimen evaluated in the IVAN trial was chosen partly to minimise the possibility of  
25 disadvantage to participants in these groups and partly to minimise the number of  
26 retreatment decisions required. Neither monthly treatment nor treatments given as  
27 blocks of three are used widely in routine practice, although following publication of  
28 IVAN,<sup>1 6</sup> there appears to be increased interest in the “IVAN regimen”. The cost-  
29 effectiveness of monthly versus intermittent treatment will therefore vary between  
30 treatment centres depending on local costs and clinical practice.  
31  
32  
33  
34  
35  
36  
37  
38  
39  
40  
41  
42  
43  
44  
45  
46  
47

48 Unlike previous studies, our analysis is based on high-quality data from an RCT,  
49 which was powered to exclude any clinically-meaningful difference in visual acuity  
50 and with prospective measurements of costs and quality of life. It therefore provides  
51 unequivocally-unbiased estimates of incremental costs and QALYs. Nevertheless,  
52 our analysis confirms the findings of previous economic evaluations, namely that  
53 ranibizumab is not cost-effective compared with bevacizumab.<sup>11 17</sup> We are also (to  
54 our knowledge) the first to evaluate the cost-effectiveness of alternative treatment  
55  
56  
57  
58  
59  
60

1  
2  
3 regimens. In addition to following best practice for trial-based economic evaluation,  
4 this study includes several novel aspects, such as measuring quality of life after SAEs,  
5 excluding chance differences in deaths unrelated to treatment and allowing for the  
6 factorial design by including only large or statistically significant interactions.  
7  
8

9  
10  
11 The study also estimates the cost of consultations to administer  
12 ranibizumab/bevacizumab and monitor outcomes, which could be used in other  
13 economic evaluations. Micro-costing shows the main drivers of consultation costs  
14 and highlighted substantial variation in costs between centres; this variation means  
15 that the cost-effectiveness of continuous versus discontinuous bevacizumab (but not  
16 ranibizumab versus bevacizumab) will vary between centres. It is important to note  
17 that the costs were calculated to assess incremental cost-effectiveness in IVAN and  
18 should not be used to set the prices at which hospitals are reimbursed. In particular,  
19 they are bottom-up estimates that exclude unpaid overtime and VAT and make  
20 assumptions about overheads and proportion of staff-time spent on patient contacts. In  
21 most settings it is likely that the costs to healthcare commissioners will be higher and  
22 subject to local negotiations with care providers.  
23  
24  
25  
26  
27  
28  
29  
30  
31  
32

33 The base case analysis focused on mortality attributable to study medication and  
34 the costs associated with “expected” SAEs/AEs and excluded other costs. This  
35 reduced the risk that chance differences in resource use not associated with study  
36 medication could distort our conclusions. However, it also means that the  
37 unanticipated increase in the incidence of other SAEs (e.g. gastrointestinal events)  
38 with bevacizumab<sup>1 6</sup> (which comprised the only difference in SAEs between drugs) is  
39 not taken into account in the costing analysis. However, sensitivity analyses  
40 including the cost of all SAEs/AEs gave the same conclusions.  
41  
42  
43  
44  
45  
46  
47

48 Further research is needed to assess the extent to which the cost-effectiveness  
49 findings generalise to other countries with different relative prices and management of  
50 nAMD and SAEs/AEs. For example, the incidence of SAEs was substantially lower  
51 in IVAN than CATT,<sup>6 7</sup> although sensitivity analyses suggested that this did not  
52 change the conclusions. The costs of the two drugs may vary between centres within  
53 the UK as hospitals may use different bevacizumab suppliers or have different  
54 discounts on ranibizumab. Nevertheless, because we collected very detailed  
55  
56  
57  
58  
59  
60

1  
2  
3 information on resource use, policy makers in other countries can review these data  
4 against their own to examine their similarity and, hence, the applicability of our  
5 findings to their setting. Future work combining data from IVAN with that from other  
6 trials, such as CATT,<sup>7</sup> may help reduce uncertainty and evaluate the extent to which  
7 the results can be generalised. However we believe that our primary finding of  
8 ranibizumab representing very poor value for money compared with bevacizumab  
9 does apply throughout the world.  
10  
11  
12  
13  
14  
15  
16  
17  
18  
19  
20  
21  
22  
23  
24  
25  
26  
27  
28  
29  
30  
31  
32  
33  
34  
35  
36  
37  
38  
39  
40  
41  
42  
43  
44  
45  
46  
47  
48  
49  
50  
51  
52  
53  
54  
55  
56  
57  
58  
59  
60

1  
2  
3  
4  
5  
6  
7  
8  
9  
10  
11  
12  
13  
14  
15  
16  
17  
18  
19  
20  
21  
22  
23  
24  
25  
26  
27  
28  
29  
30  
31  
32  
33  
34  
35  
36  
37  
38  
39  
40  
41  
42  
43  
44  
45  
46  
47  
48  
49  
50  
51  
52  
53  
54  
55  
56  
57  
58  
59  
60

For peer review only

### **Funding and role of study sponsors**

The IVAN trial is funded by the National Institute for Health Research (NIHR) Health Technology Assessment (HTA) programme (project number 07/36/01) and a full report will be published in *Health Technology Assessment*. Visit the HTA programme website ([www.hta.ac.uk](http://www.hta.ac.uk)) for further project information. The views and opinions expressed are those of the authors and do not necessarily reflect those of the HTA programme, NIHR, the UK National Health Service or the Department of Health. The funder had no involvement in: the collection, analysis, and interpretation of data; in the writing of the report; and in the decision to submit the article for publication. The authors had full access to the data (including statistical reports and tables), can take responsibility for the integrity of the data and the accuracy of the data analysis and are responsible for submitting this paper.

### **Competing interest statement**

All authors have completed the Unified Competing Interest form at [www.icmje.org/coi\\_disclosure.pdf](http://www.icmje.org/coi_disclosure.pdf) (available on request from the corresponding author). All authors had financial support from the NIHR for the submitted work. HD, SW, GA and JR have no financial or non-financial interests relevant to the submitted work. UC, SH, SD and AL are principal investigators of trials sponsored by Novartis, the manufacturers of ranibizumab. UC has attended and been remunerated for attendance at advisory boards for Novartis, Bayer, Neovista, Oraya, Allergan, and Bausch and Lomb; and her employing institution has received payments from Novartis, Bayer, Neovista, Oraya, Alcon, and Pfizer. SH has attended and been remunerated for attendance at advisory boards for and received travel support from Novartis and Allergan. CR has received an honorarium from Novartis for a lecture. SD's and AL's employing institutions have received payments from Novartis. SD and AL have received honoraria from Novartis for lectures. AL has attended and been remunerated for attendance at advisory boards for Novartis and Bayer; likewise SD for Bayer and Ely Lilly. BR has received a fee for teaching from Janssen-Cilag.

### Copyright/licence

The Corresponding Author has the right to grant on behalf of all authors and does grant on behalf of all authors, a worldwide licence to the Publishers and its licensees in perpetuity, in all forms, formats and media (whether known now or created in the future), to i) publish, reproduce, distribute, display and store the Contribution, ii) translate the Contribution into other languages, create adaptations, reprints, include within collections and create summaries, extracts and/or, abstracts of the Contribution, iii) create any other derivative work(s) based on the Contribution, iv) to exploit all subsidiary rights in the Contribution, v) the inclusion of electronic links from the Contribution to third party material where-ever it may be located; and, vi) licence any third party to do any or all of the above.

### Authorship statement

SW, CR, JR, SH, AL, SD, BR and UC conceived, designed and conducted the IVAN trial. HD, SW, GA and JR conceived and designed the economic evaluation, with extensive input from CR, SH and BR. CR supervised collation/cleaning of trial data, while HD, SW and GA collected additional resource use data from centres. HD conducted the economic analysis with help from GA under the supervision of SW. HD drafted the manuscript. All authors edited the manuscript for important intellectual content and approved the final version.

### Acknowledgements

The IVAN Study Investigators are listed in Appendix 1 of reference.<sup>1</sup>

We would also like to thank the IVAN participants and the clinicians, nurses and clinic managers who completed resource use questionnaires.

### Transparency declaration

The manuscript's guarantor (HD) affirms that the manuscript is an honest, accurate, and transparent account of the study being reported; that no important aspects of the study have been omitted; and that any discrepancies from the study as planned (and, if relevant, registered) have been explained.

**Data sharing**

No additional data available

**Ethics statement**

Participants provided written informed consent. A UK National Health Service Research Ethics Committee approved the trial (07/NIR03/37).

For peer review only

## References

1. The IVAN Study Investigators, Chakravarthy U, Harding SP, et al. Ranibizumab versus Bevacizumab to Treat Neovascular Age-related Macular Degeneration: One-Year Findings from the IVAN Randomized Trial. *Ophthalmology* 2012;**119**(7):1399-411.
2. Brown DM, Michels M, Kaiser PK, et al. Ranibizumab versus verteporfin photodynamic therapy for neovascular age-related macular degeneration: Two-year results of the ANCHOR study. *Ophthalmology* 2009;**116**(1):57-65.e5.
3. Rosenfeld PJ, Brown DM, Heier JS, et al. Ranibizumab for neovascular age-related macular degeneration. *The New England journal of medicine* 2006;**355**(14):1419-31.
4. British Medical Association. *British National Formulary 62* (<http://bnf.org/bnf/index.htm>). London: Pharmaceutical Press, September 2011.
5. Mitchell P. A systematic review of the efficacy and safety outcomes of anti-VEGF agents used for treating neovascular age-related macular degeneration: comparison of ranibizumab and bevacizumab. *Current Medical Research & Opinion* 2011;**27**(7):1465-75.
6. Chakravarthy U, Harding SP, Rogers CA, et al. Alternative treatments to inhibit VEGF in age-related choroidal neovascularisation: 2-year findings of the IVAN randomised controlled trial. *Lancet* 2013;**382**(9900):1258-67.
7. Martin DF, Maguire MG, Fine SL, et al. Ranibizumab and Bevacizumab for Treatment of Neovascular Age-related Macular Degeneration: Two-Year Results. *Ophthalmology* 2012;**119**(7):1388-98.
8. Martin DF, Maguire MG, Ying GS, et al. Ranibizumab and bevacizumab for neovascular age-related macular degeneration. *N Engl J Med* 2011;**364**(20):1897-908.
9. Mitchell P, Annemans L, White R, et al. Cost effectiveness of treatments for wet age-related macular degeneration. *Pharmacoeconomics* 2011;**29**(2):107-31.
10. Yanagi Y, Aihara Y, Fukuda T, et al. [Cost-effectiveness of ranibizumab, photodynamic therapy and pegaptanib sodium in the treatment of neovascular



- 1  
2  
3 age-related macular degeneration in Japanese]. *Nihon Ganka Gakkai Zasshi*  
4 2011;**115**(9):825-31.
- 5  
6 11. Patel JJ, Mendes MA, Bounthavong M, et al. Cost-utility analysis of bevacizumab  
7 versus ranibizumab in neovascular age-related macular degeneration using a  
8 Markov model. *J Eval Clin Pract* 2012;**18**(2):247-55.
- 9  
10 12. Gower EW, Cassard SD, Bass EB, et al. A cost-effectiveness analysis of three  
11 treatments for age-related macular degeneration. *Retina* 2010;**30**(2):212-21.
- 12  
13 13. Hernandez-Pastor LJ, Ortega A, Garcia-Layana A, et al. Cost-effectiveness of  
14 ranibizumab compared with pegaptanib in neovascular age-related macular  
15 degeneration. *Graefes Archive for Clinical & Experimental Ophthalmology*  
16 2010;**248**(4):467-76.
- 17  
18 14. Neubauer AS, Holz FG, Sauer S, et al. Cost-effectiveness of ranibizumab for the  
19 treatment of neovascular age-related macular degeneration in Germany: Model  
20 analysis from the perspective of Germany's statutory health insurance system.  
21 *Clinical Therapeutics* 2010;**32**(7):1343-56.
- 22  
23 15. Smiddy WE. Economic implications of current age-related macular degeneration  
24 treatments. *Ophthalmology* 2009;**116**(3):481-7.
- 25  
26 16. Fletcher EC, Lade RJ, Adewoyin T, et al. Computerized model of cost-utility  
27 analysis for treatment of age-related macular degeneration. *Ophthalmology*  
28 2008;**115**(12):2192-8.
- 29  
30 17. Raftery J, Clegg A, Jones J, et al. Ranibizumab (Lucentis) versus bevacizumab  
31 (Avastin): modelling cost effectiveness. *Br J Ophthalmol* 2007;**91**(9):1244-6.
- 32  
33 18. National Institute for Health and Care Excellence. Guide to the methods of  
34 technology appraisal 2013. Secondary Guide to the methods of technology  
35 appraisal 2013 2013.  
36 [http://www.nice.org.uk/media/D45/1E/GuideToMethodsTechnologyAppraisal](http://www.nice.org.uk/media/D45/1E/GuideToMethodsTechnologyAppraisal2013.pdf)  
37 [2013.pdf](http://www.nice.org.uk/media/D45/1E/GuideToMethodsTechnologyAppraisal2013.pdf).
- 38  
39 19. Drummond MF, Sculpher MJ, Torrance GW, et al. *Methods for the economic*  
40 *evaluation of health care programmes*. 3rd ed. New York: Oxford University  
41 Press, 2005.
- 42  
43 20. Dakin H, Wordsworth S. Cost-minimisation analysis versus cost-effectiveness  
44 analysis, revisited. *Health Econ* 2013;**22**(1):22-34.
- 45  
46 21. Briggs AH, O'Brien BJ. The death of cost-minimization analysis? *Health Econ*  
47 2001;**10**(2):179-84.
- 48  
49  
50  
51  
52  
53  
54  
55  
56  
57  
58  
59  
60

- 1  
2  
3 22. Jonsson B, Weinstein MC. Economic evaluation alongside multinational clinical  
4 trials. Study considerations for GUSTO IIb. International journal of  
5 technology assessment in health care 1997;**13**(1):49-58.  
6  
7  
8 23. Department of Health. PbR operational guidance and tariffs: 2011-12 tariff  
9 information spreadsheet. Secondary PbR operational guidance and tariffs:  
10 2011-12 tariff information spreadsheet 2011.  
11 [http://www.dh.gov.uk/en/Publicationsandstatistics/Publications/PublicationsP  
12 olicyAndGuidance/DH\\_124356](http://www.dh.gov.uk/en/Publicationsandstatistics/Publications/PublicationsPolicyAndGuidance/DH_124356).  
13  
14 24. Department of Health. National Schedule of Reference Costs 2010-11 for NHS  
15 Trusts and PCTs combined. Secondary National Schedule of Reference Costs  
16 2010-11 for NHS Trusts and PCTs combined November 2011.  
17 [http://www.dh.gov.uk/prod\\_consum\\_dh/groups/dh\\_digitalassets/documents/di  
18 gitalasset/dh\\_131148.xls](http://www.dh.gov.uk/prod_consum_dh/groups/dh_digitalassets/documents/digitalasset/dh_131148.xls).  
19  
20 25. Curtis L. Unit Costs of Health and Social Care 2011. Pages 91, 129-150, 177-213.  
21 Secondary Unit Costs of Health and Social Care 2011. Pages 91, 129-150,  
22 177-213 2011. <http://www.pssru.ac.uk/archive/pdf/uc/uc2011/uc2011.pdf>.  
23  
24 26. Dolan P. Modeling valuations for EuroQol health states. Med Care  
25 1997;**35**(11):1095-108.  
26  
27 27. White IR, Royston P, Wood AM. Multiple imputation using chained equations:  
28 Issues and guidance for practice. Stat Med 2011;**30**(4):377-99.  
29  
30 28. Royston P. Multiple imputation of missing values: further update of ice, with an  
31 emphasis on interval censoring. Stata Journal 2007;**7**:445-64.  
32  
33 29. Hallstrom AP, Sullivan SD. On estimating costs for economic evaluation in failure  
34 time studies. Med Care 1998;**36**(3):433-6.  
35  
36 30. Gray A, Clarke P, Wolstenholme J, et al. *Applied Methods of Cost-Effectiveness*  
37 *Analysis in Health Care* Oxford: Oxford University Press, 2011.  
38  
39 31. National Institute for Health and Clinical Excellence. Social value judgements:  
40 Principles for the development of NICE guidance. Second Edition. Secondary  
41 Social value judgements: Principles for the development of NICE guidance.  
42 Second Edition 2008.  
43 <http://www.nice.org.uk/media/C18/30/SVJ2PUBLICATION2008.pdf>.  
44  
45 32. National Institute for Health and Clinical Excellence. Ranibizumab and  
46 pegaptanib for the treatment of age-related macular degeneration TA155:  
47 Costing template and report. Secondary Ranibizumab and pegaptanib for the  
48  
49  
50  
51  
52  
53  
54  
55  
56  
57  
58  
59  
60

1  
2  
3 treatment of age-related macular degeneration TA155: Costing template and  
4 report August 2008.

5  
6 (<http://www.nice.org.uk/nicemedia/live/12057/41735/41735.xls>).

7  
8 33. General Medical Council. Good practice in prescribing and managing medicines  
9 and devices. Secondary Good practice in prescribing and managing medicines  
10 and devices 2013. [http://www.gmc-](http://www.gmc-uk.org/static/documents/content/Prescribing_guidance.pdf)  
11 [uk.org/static/documents/content/Prescribing\\_guidance.pdf](http://www.gmc-uk.org/static/documents/content/Prescribing_guidance.pdf).

12  
13 34. Curtis LH, Hammill BG, Schulman KA, et al. Risks of mortality, myocardial  
14 infarction, bleeding, and stroke associated with therapies for age-related  
15 macular degeneration.[Erratum appears in Arch Ophthalmol. 2010  
16 Dec;128(12):1623]. Archives of Ophthalmology 2010;**128**(10):1273-9.

17  
18 35. Bayer Plc. Summary of product characteristics for Eylea 40mg/ml solution for  
19 injection in a vial Secondary Summary of product characteristics for Eylea  
20 40mg/ml solution for injection in a vial 2013.  
21 [http://www.medicines.org.uk/emc/medicine/27224/SPC/Eylea+40mg+ml+sol](http://www.medicines.org.uk/emc/medicine/27224/SPC/Eylea+40mg+ml+solution+for+injection+in+a+vial/)  
22 [ution+for+injection+in+a+vial/](http://www.medicines.org.uk/emc/medicine/27224/SPC/Eylea+40mg+ml+solution+for+injection+in+a+vial/).

Table 1: Results of the economic evaluation

|                                          | Total QALYs (95% CI)‡                 | Mean (95% CI) drug cost‡                | Mean (95% CI) administration & monitoring cost | Mean (95% CI) medication/medical service cost‡ | Total cost (95% CI)‡                    | Total net benefits (95% CI)†‡              |
|------------------------------------------|---------------------------------------|-----------------------------------------|------------------------------------------------|------------------------------------------------|-----------------------------------------|--------------------------------------------|
| Discontinuous bevacizumab                | 1.584 (1.538, 1.630)                  | £651 (£605, £698)                       | £1,825 (£1,708, £1,941)                        | £526 (£144, £908)                              | £3,002 (£2,601, £3,403)                 | £28,683 (£27,707, £29,658)                 |
| Continuous bevacizumab                   | 1.604 (1.563, 1.645)                  | £1,065 (£1,048, £1,081)                 | £1,952 (£1,860, £2,043)                        | £585 (£250, £919)                              | £3,601 (£3,259, £3,943)                 | £28,480 (£27,548, £29,412)                 |
| Discontinuous ranibizumab                | 1.582 (1.530, 1.634)                  | £9,229 (£8,584, £9,875)                 | £1,838 (£1,724, £1,952)                        | £432 (£253, £611)                              | £11,500 (£10,798, £12,202)              | £20,142 (£18,963, £21,321)                 |
| Continuous ranibizumab                   | 1.608 (1.565, 1.651)                  | £16,286 (£16,011, £16,562)              | £1,970 (£1,883, £2,057)                        | £334 (£215, £452)                              | £18,590 (£18,258, £18,922)              | £13,576 (£12,769, £14,383)                 |
| Difference: ranibizumab vs. bevacizumab  | Continuous: 0.004 (-0.046, 0.054)     | Continuous: £15,222 (£14,948, £15,495)* | £16 (-£109, £141)                              | Continuous: -£251 (-£604, £102)                | Continuous: £14,989 (£14,522, £15,456)* | Continuous: -£14,904 (-£15,995, -£13,813)* |
|                                          | Discontinuous: -0.002 (-0.064, 0.060) | Discontinuous: £8,578 (£7,932, £9,225)* |                                                | Discontinuous: -£94 (-£514, £326)              | Discontinuous: £8,498 (£7,700, £9,295)* | Discontinuous: -£8,541 (-£9,939, -£7,144)* |
| Difference: continuous vs. discontinuous | Ranibizumab: 0.026 (-0.032, 0.085)    | Ranibizumab: £7,057 (£6,364, £7,750)*   | £130 (£20, £239)*                              | Ranibizumab: -£98 (-£310, £113)                | Ranibizumab: £7,090 (£6,337, £7,844)*   | Ranibizumab: -£6,566 (-£7,861, -£5,271)*   |
|                                          | Bevacizumab: 0.020 (-0.032, 0.071)    | Bevacizumab: £413 (£365, £462)*         |                                                | Bevacizumab: £59 (-£438, £556)                 | Bevacizumab: £599 (£91, £1,107)*        | Bevacizumab: -£203 (-£1,372, £967)         |
| Interaction                              | 0.006 (-0.071, 0.084)                 | £6,643 (£5,949, £7,338)*                | £5 (-£31, £42)                                 | -£157 (-£696, £381)                            | £6,491 (£5,604, £7,379)*                | -£6,363 (-£8,088, -£4,638)*                |

\* Significantly different from zero (p<0.05).

† Net benefits equal QALYs multiplied by ceiling ratio minus costs; the net benefits shown in this table were calculated at a £20,000/QALY ceiling ratio.

‡ Analysis allowed for interactions.

**Figure 1:** Schematic illustrating the assumptions made about the frequency of injection and monitoring consultations within the costing analysis. The consultations required by patients on discontinuous treatment will depend on when they met treatment failure criteria; Patient 2 met the re-treatment criteria at visits 0, 7 and 11.

|                                          | Visit                 | 0 | 1 | 2 | 3 | 4 | 5 | 6 | 7 | 8 | 9 | 10 | 11 |
|------------------------------------------|-----------------------|---|---|---|---|---|---|---|---|---|---|----|----|
| Patient 1:<br>Continuous<br>treatment    | Injection             | ✓ | ✓ | ✓ | ✓ | ✓ | ✓ | X | ✓ | ✓ | ✓ | ✓  | ✓  |
|                                          | Monitoring<br>consult | ✓ |   |   | ✓ |   |   | X |   |   | ✓ |    |    |
|                                          | FFA                   | ✓ |   |   | ? |   |   | X |   |   | ? |    |    |
| Patient 2:<br>Discontinuous<br>treatment | Injection             | ✓ | ✓ | ✓ |   |   |   |   | ✓ | ✓ | ✓ |    | ✓  |
|                                          | Monitoring<br>consult | ✓ |   |   | ✓ | ✓ | X | ✓ | ✓ |   |   | ✓  | ✓  |
|                                          | FFA                   | ✓ |   |   | ? | ? | X | ? | ? |   |   | ?  | ?  |

✓ Relevant consultation cost was applied.

? The cost of fundus fluorescein angiography (FFA) was applied if clinically indicated: for discontinuous patients, this was applied whenever the patient had FFA in the trial; for continuous patients, the proportion of patients having FFA was based on estimated use in routine clinical practice.

X No consultation cost was applied as the participant missed the visit.

1  
2  
3 **Figure 2:** Cost-effectiveness acceptability curve showing the probability that each treatment  
4 is the most cost-effective strategy evaluated in IVAN at a range of ceiling ratios. For example,  
5 at a ceiling ratio of £20,000/QALY gained (shown by the vertical dashed line), there is a 63%  
6 probability that discontinuous bevacizumab is best and a 37% probability that continuous  
7 bevacizumab is best, while the probability that either ranibizumab treatment regimen is best is  
8 approximately 0% (total = 100%).  
9  
10  
11  
12  
13  
14  
15  
16  
17  
18  
19  
20  
21  
22  
23  
24  
25  
26  
27  
28  
29  
30  
31  
32  
33  
34  
35  
36  
37  
38  
39  
40  
41  
42  
43  
44  
45  
46  
47  
48  
49  
50  
51  
52  
53  
54  
55  
56  
57  
58  
59  
60

1  
2  
3 **Figure 3:** Effect of sensitivity analyses on total net benefits for each of the four treatment  
4 arms, assuming a £20,000/QALY ceiling ratio. Treatments that are more cost-effective have  
5 higher net benefits; the treatment furthest to the right is therefore most cost-effective, while  
6 the treatment furthest to the left is the least cost-effective. Error bars represent 95%  
7 confidence intervals.  
8  
9  
10  
11  
12  
13  
14  
15  
16  
17  
18  
19  
20  
21  
22  
23  
24  
25  
26  
27  
28  
29  
30  
31  
32  
33  
34  
35  
36  
37  
38  
39  
40  
41  
42  
43  
44  
45  
46  
47  
48  
49  
50  
51  
52  
53  
54  
55  
56  
57  
58  
59  
60

1  
2  
3  
4  
5  
6  
7  
8  
9  
10  
11  
12  
13  
14  
15  
16  
17  
18  
19  
20  
21  
22  
23  
24  
25  
26  
27  
28  
29  
30  
31  
32  
33  
34  
35  
36  
37  
38  
39  
40  
41  
42  
43  
44  
45  
46  
47  
48  
49  
50  
51  
52  
53  
54  
55  
56  
57  
58  
59  
60

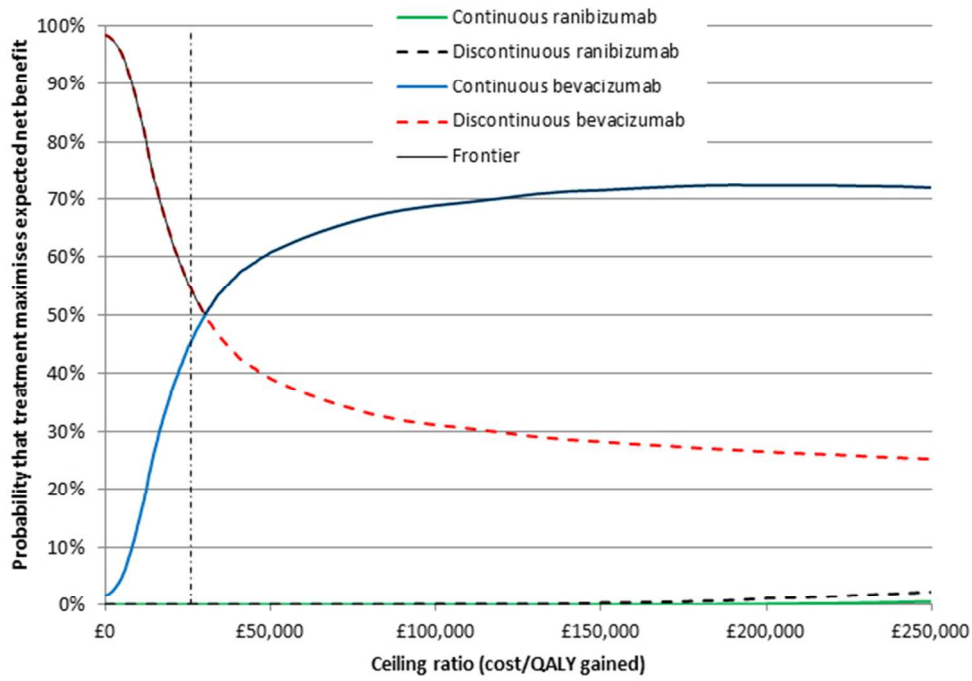

Cost-effectiveness acceptability curve showing the probability that each treatment is the most cost-effective strategy evaluated in IVAN at a range of ceiling ratios. For example, at a ceiling ratio of £20,000/QALY gained (shown by the vertical dashed line), there is a 63% probability that discontinuous bevacizumab is best and a 37% probability that continuous bevacizumab is best, while the probability that either ranibizumab treatment regimen is best is approximately 0% (total = 100%).  
179x129mm (96 x 96 DPI)

For peer review only



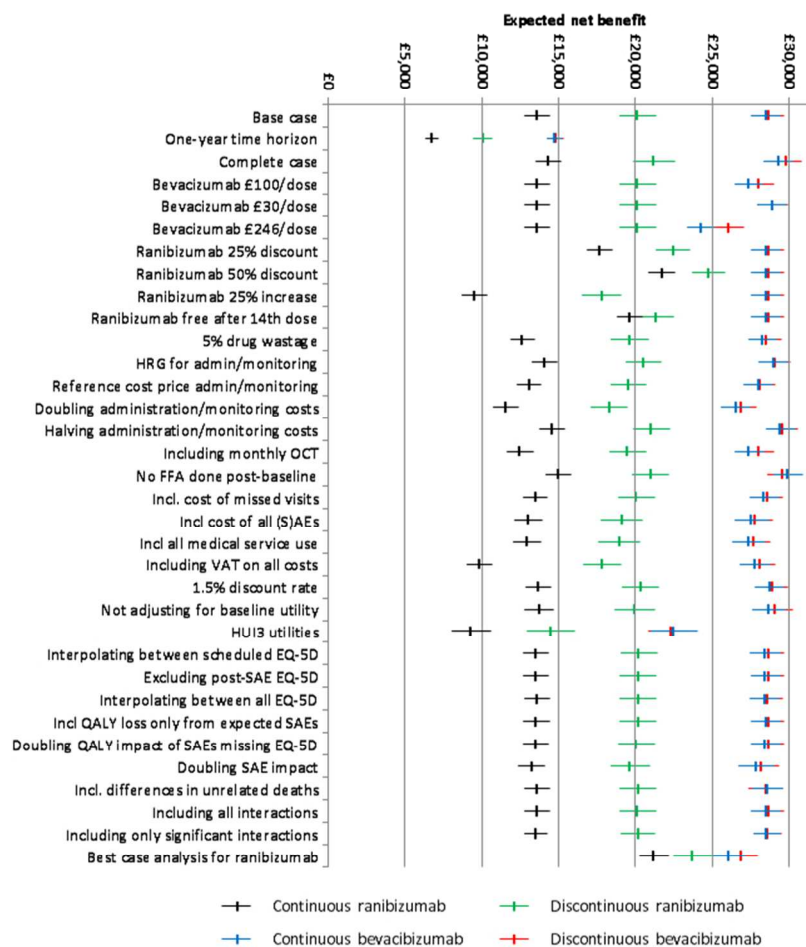

Effect of sensitivity analyses on total net benefits for each of the four treatment arms, assuming a £20,000/QALY ceiling ratio. Treatments that are more cost-effective have higher net benefits; the treatment furthest to the right is therefore most cost-effective, while the treatment furthest to the left is the least cost-effective. Error bars represent 95% confidence intervals.

190x254mm (96 x 96 DPI)

## Appendix: Additional details on the statistical analysis

### *Definition of expected AEs or SAEs*

The base case analysis focused on resource use associated with the study eye or associated with adverse events (AEs) or serious adverse events (SAEs) that were “*expected*”: i.e. previously linked to anti-VEGF treatment. The list of AEs and SAEs continued to be “*expected*” was based on the IVAN trial protocol.<sup>1</sup>

The following were considered to be expected SAEs within the economic evaluation: angina pectoris; arthralgia; cardiac arrest; cardiac failure; cardiovascular disorder; cataract traumatic; cerebrovascular accident; coronary artery bypass; deep vein thrombosis; endophthalmitis; haemorrhage; intraocular pressure increased; left ventricular failure; myocardial infarction; nausea; pulmonary embolism; retinal detachment; retinal pigment epithelial tear; retinal vein occlusion; transient ischaemic attack; upper respiratory tract infection; urinary tract infection; and uveitis.

The following AEs were considered to be expected: angina pectoris; arthralgia; bronchitis; cardiac disorder; cataract; cataract cortical; cataract nuclear; cataract operation; cataract traumatic; conjunctival haemorrhage; cough; eye inflammation; eye irritation; eye pain; haemorrhage; hallucination, visual; headache; hypertension; influenza; intraocular pressure increased; lacrimation increased; nasopharyngitis; nausea; pulmonary embolism; retinal detachment; retinal pigment epithelial tear; retinal vein occlusion; sinusitis; transient ischaemic attack; upper respiratory tract infection; urinary tract infection; uveitis; visual impairment; vitreous detachment; and vitreous floaters.

### *Measurement and valuation of health benefits*

Mixed models were used to estimate the rate at which patients’ EQ-5D utility improves after SAEs or reductions in visual acuity. For patients who experienced an SAE that reduced EQ-5D utility, models assumed that EQ-5D utility fell on the day of the SAE and rose linearly afterwards. Similar profiles have previously been used to model recovery from acute hepatitis<sup>2</sup> and chronic obstructive pulmonary disease exacerbations.<sup>3</sup> We focused on linear

recovery profiles to simplify subsequent QALY calculations and as models with quadratic recovery curves did not fit the data as well as those with linear profiles.

Mixed models were estimated on all post-baseline utility measurements using the xtmixed command in Stata. A basic model was defined and a pre-specified series of variations on this model were evaluated and included in the base case analysis if they reduced Akaike's information criterion (AIC). The final model divided SAEs into four categories:

- Ocular (including reductions in visual acuity, increased intraocular pressure and all SAEs in the "eye disorders" MedDRA category)
- Cardiovascular (including all SAEs classed as "cardiac disorders", plus cerebrovascular accident, coronary artery bypass, deep vein thrombosis, haemorrhage, pulmonary embolism and transient ischaemic attack)
- Cancer (comprising all events in the "Neoplasms benign, malignant and unspecified" MedDRA category)
- Other (all events not falling into one of the previous four categories)

The model assumed that each type of SAE that patients had experienced reduced the EQ-5D utility of patient  $i$  at time  $j$  by  $\beta_{\text{Event},i}$ , but that EQ-5D utility rose by a certain amount ( $\beta_{\text{EventRecovery}}$ ) with each day that passed after each type of SAE. EQ-5D utility was also assumed to be a function of time since randomisation, treatment and baseline EQ-5D utility (centred by subtracting the mean baseline EQ-5D utility across all patients):

$$\begin{aligned} \text{EQ-5D}_{ij} = & \text{Constant}_i + \beta_{\text{BL}} \cdot (\text{BLEQ5D}_{ij} - \text{MeanBLEQ5D}) + \beta_{\text{Time},j} \cdot \text{Time}_{ij} \\ & + \beta_{\text{Bevacizumab}} \cdot \text{Bevacizumab}_i + \beta_{\text{Discontinuous}} \cdot \text{Discontinuous}_i \\ & + \beta_{\text{Interact}} \cdot \text{Bevacizumab}_i \cdot \text{Discontinuous}_i \\ & + \beta_{\text{CVD},i} \cdot \text{CVD}_{ij} + \beta_{\text{CVDRecovery}} \cdot \text{TimeSinceCVD}_{ij} \\ & + \beta_{\text{Ocular},i} \cdot \text{Ocular}_{ij} + \beta_{\text{OcularRecovery}} \cdot \text{TimeSinceOcular}_{ij} \\ & + \beta_{\text{Cancer},i} \cdot \text{Cancer}_{ij} + \beta_{\text{CancerRecovery}} \cdot \text{TimeSinceCancer}_{ij} \\ & + \beta_{\text{Other},i} \cdot \text{Other}_{ij} + \beta_{\text{OtherRecovery}} \cdot \text{TimeSinceOther}_{ij} \end{aligned}$$

The slopes estimated in the mixed models (e.g.  $\beta_{\text{CVDRecovery}}$ ) were used alongside the observed EQ-5D measurements for each patient to estimate EQ-5D utility on the day the SAE started and identify the point at which EQ-5D utility returned to the level that would be expected from the EQ-5D utility measurements that were not taken after SAEs (Figure A). However, some post-SAE measurements were higher than would have been expected from

the other measurements for that patient (e.g. Figure A); in these cases, we assumed that EQ-5D utility changed linearly between the routine measurements (Figure A). For patients dying 1-7 days after the latest SAE, EQ-5D utility was assumed to fall linearly to 0 between the date the SAE started and the date of death. Further details will be reported in *Health Technology Assessment*.

**Figure A** Illustration of the utility profile around SAEs. EQ-5D utility measurements after SAEs are shown in white circles, while scheduled measurements are shown in black circles. The EQ-5D utility measurement after this patient's first set of SAEs is higher than would be expected from the baseline and three-month measurements; we therefore assumed that EQ-5D utility rose linearly from baseline to the post-SAE measurement and from this onto the 3-month measurement. EQ-5D utility is lower after their second set of SAEs; here, we use the slope coefficients from the mixed model that show the rate of recovery after the categories of SAE that this patient has experienced to draw a line through the post-SAE 2 measurement and estimate EQ-5D utility on the day SAE 2 starts and the time and EQ-5D utility at which the patient is expected to have recovered from the SAE and returned to the EQ-5D utility trend between visits three and 12. The patient died five days after SAE 3; their EQ-5D utility was therefore assumed to follow the linear trend observed between visit 12 and the value imputed at visit 24 up until the day before SAE 3, and then fall linearly to zero between that date and the date of death.

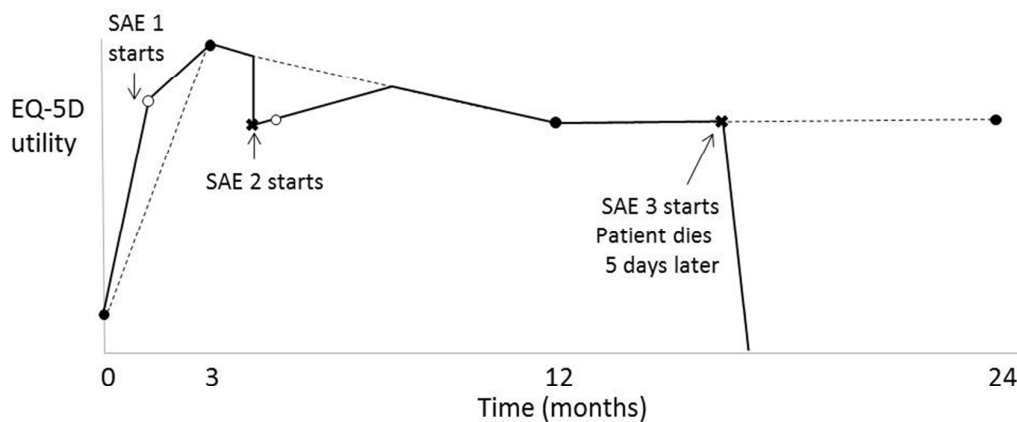

### Statistical methods

The economic evaluation used linear regression models with nonparametric bootstrapping, Kaplan-Meier sample averaging and Rubin's rule to combine the quarterly costs and QALYs accrued by each patient to estimate mean total costs and mean QALYs for each of the four study arms.

Thirty-two ordinary least squares regression analyses<sup>1</sup> were used to predict the drug costs, administration/monitoring costs, medication/medical service use costs and QALYs accrued in each quarter conditional on treatment regimen and drug. Interactions between drug and treatment regimen were included as additional independent variables for quarters 2-8 if they

<sup>1</sup> 32 = four variables multiplied by eight quarters.

1  
2  
3 were either statistically significant or larger than main effects.<sup>2</sup> Since all patients received  
4 monthly injections at visits 0-2, we assumed no interaction and no impact of treatment  
5 regimen during quarter 1. Analyses of QALYs also controlled for baseline utility to eliminate  
6 any bias that could result from imbalance in baseline utility.<sup>4</sup>  
7  
8  
9

10  
11 We used non-parametric bootstrapping to quantify the uncertainty around quarterly costs  
12 and QALYs, allowing for the skewed, heteroskedastic distributions and correlations between  
13 outcomes.<sup>5</sup> Bootstrapping involved sampling patients with replacement from each  
14 randomised group and estimating all regressions on each bootstrap sample. We also allowed  
15 for uncertainty around multiple imputation by generating 100 imputed datasets, each with  
16 different values drawn from the imputation model. Uncertainty around consultation costs and  
17 the rate of recovery from SAEs was taken into account by randomly sampling values from  
18 the relevant distributions for each imputed data set. Bootstrap samples were drawn 130 times  
19 for each of the 100 imputed datasets, generating 13,000 bootstrap estimates of mean quarterly  
20 costs and QALYs for each of the four study groups, which allow for uncertainty around  
21 imputed utilities, the rate of recovery from SAEs and consultation costs.  
22  
23  
24  
25  
26  
27  
28  
29  
30

31 We also allowed for patients withdrawing early from the trial using Kaplan-Meier sample  
32 averaging, whereby costs and outcomes in each quarter are multiplied by Kaplan-Meier  
33 estimates of the probability of patients remaining alive at the start of each quarter and  
34 summed over all four quarters.<sup>5,6</sup> Kaplan-Meier estimates were adapted to prevent chance  
35 differences in numbers of deaths unrelated to treatment<sup>3</sup> affecting incremental QALYs by  
36 adding the overall probability of deaths unlikely/not related to study medication (averaged  
37 across all four arms) to the probability of potentially-drug related deaths that was observed in  
38 each arm. After weighting quarterly costs and QALYs by the Kaplan-Meier estimate of the  
39 proportion of patients alive at the start of the quarter and discounting costs incurred in Year 2  
40 by 3.5%, quarterly costs and QALYs were added up to give the total cost and total QALYs  
41 accrued in each treatment group over the two-year trial period. The 100 imputed datasets  
42  
43  
44  
45  
46  
47  
48  
49

---

50  
51 <sup>2</sup> Analyses were replicated with and without interactions for drug costs, administration/monitoring costs,  
52 medication/medical service use costs and QALYs to identify any interactions that were statistically significant  
53 or had an absolute magnitude larger than either the main effect for treatment regimen or the main effect for  
54 drug. Interactions that were either statistically significant or larger than either main effect were included in the  
55 base case analysis to ensure that the bias associated with omitting qualitative interactions did not change the  
56 conclusions.

57 <sup>3</sup> The five causality groups that study investigators classified all SAEs into were used to categorise deaths into  
58 those definitely/probably/possibly related to study medication (referred to as potentially drug-related deaths) and  
59 those unlikely to be/not related to study medication (referred to as unrelated deaths).  
60

1  
2  
3 were combined using Rubin's rule<sup>7</sup> to estimate total and incremental costs, QALYs and net  
4 benefits and their standard errors (SE). Rubin's rule was implemented in Microsoft Excel,  
5 while all other statistical analyses were conducted in Stata version 12.  
6  
7  
8

## 9 10 **References**

- 11 1. The IVAN Study Investigators, Chakravarthy U, Harding SP, et al. Ranibizumab versus  
12 Bevacizumab to Treat Neovascular Age-related Macular Degeneration: One-Year  
13 Findings from the IVAN Randomized Trial. *Ophthalmology* 2012;**119**(7):1399-411.  
14
- 15 2. Luyten J, Marais C, Hens N, et al. Imputing QALYs from single time point health state  
16 descriptions on the EQ-5D and the SF-6D: a comparison of methods for hepatitis a  
17 patients. *Value in health : the journal of the International Society for*  
18 *Pharmacoeconomics and Outcomes Research* 2011;**14**(2):282-90.  
19
- 20 3. Spencer M, Briggs AH, Grossman RF, et al. Development of an economic model to assess  
21 the cost effectiveness of treatment interventions for chronic obstructive pulmonary  
22 disease. *Pharmacoeconomics* 2005;**23**(6):619-37.  
23
- 24 4. Manca A, Hawkins N, Sculpher MJ. Estimating mean QALYs in trial-based cost-  
25 effectiveness analysis: the importance of controlling for baseline utility. *Health Econ*  
26 2005;**14**(5):487-96.  
27
- 28 5. Gray A, Clarke P, Wolstenholme J, et al. *Applied Methods of Cost-Effectiveness Analysis*  
29 *in Health Care* Oxford: Oxford University Press, 2011.  
30
- 31 6. Hallstrom AP, Sullivan SD. On estimating costs for economic evaluation in failure time  
32 studies. *Med Care* 1998;**36**(3):433-6.  
33
- 34 7. White IR, Royston P, Wood AM. Multiple imputation using chained equations: Issues and  
35 guidance for practice. *Stat Med* 2011;**30**(4):377-99.  
36  
37  
38  
39  
40  
41  
42  
43  
44  
45  
46  
47  
48  
49  
50  
51  
52  
53  
54  
55  
56  
57  
58  
59  
60

**The CHEERS Checklist is part of the CHEERS Statement.**

**The CHEERS Statement has been endorsed and co-published by the following journals:** BJOG: An International Journal of Obstetrics and Gynaecology BMC Medicine 2013; 11:80 BMJ 2013;346:f1049 Clinical Therapeutics 27 March 2013 (Article in Press DOI: 10.1016/j.clinthera.2013.03.003) Cost Effectiveness and Resource Allocation 2013 11:6. The European Journal of Health Economics 2013 Mar 26. [Epub ahead of print] International Journal of Technology Assessment in Health Care Journal of Medical Economics 2013 Mar 25. [Epub ahead of print] Pharmacoeconomics 2013 Mar 26. [Epub ahead of print] Value in Health 2013 March - April;16(2):e1-e5

Checklist taken from: <http://www.equator-network.org/wp-content/uploads/2013/09/CHEERS-Checklist-PDF.pdf>

**CHEERS Checklist**

**Items to include when reporting economic evaluations of health interventions**

| Section/item                    | Item No | Recommendation                                                                                                                                                                          | Reported on page No/ line No |
|---------------------------------|---------|-----------------------------------------------------------------------------------------------------------------------------------------------------------------------------------------|------------------------------|
| <b>Title and abstract</b>       |         |                                                                                                                                                                                         |                              |
| Title                           | 1       | Identify the study as an economic evaluation or use more specific terms such as “cost-effectiveness analysis”, and describe the interventions compared.                                 | Page 1                       |
| Abstract                        | 2       | Provide a structured summary of objectives, perspective, setting, methods (including study design and inputs), results (including base case and uncertainty analyses), and conclusions. | Page 6                       |
| <b>Introduction</b>             |         |                                                                                                                                                                                         |                              |
| Background and objectives       | 3       | Provide an explicit statement of the broader context for the study. Present the study question and its relevance for health policy or practice decisions.                               | Pages 7-8                    |
| <b>Methods</b>                  |         |                                                                                                                                                                                         |                              |
| Target population and subgroups | 4       | Describe characteristics of the base case population and subgroups analysed, including why they were chosen.                                                                            | Pages 6 and 8                |
| Setting and location            | 5       | State relevant aspects of the system(s) in which the decision(s) need(s) to be made.                                                                                                    | Pages 6 and 8                |
| Study perspective               | 6       | Describe the perspective of the study and relate this to the costs being evaluated.                                                                                                     | Page 8                       |
| Comparators                     | 7       | Describe the interventions or strategies being compared and state why they were chosen.                                                                                                 | Page 9                       |
| Time horizon                    | 8       | State the time horizon(s) over which costs and consequences are being evaluated and say why appropriate.                                                                                | Page 8                       |
| Discount rate                   | 9       | Report the choice of discount rate(s) used for costs and outcomes and say why appropriate.                                                                                              | Page 12                      |
| Choice of health outcomes       | 10      | Describe what outcomes were used as the measure(s) of benefit in the evaluation and their relevance for the type of analysis performed.                                                 | Page 9                       |

| Section/item                                           | Item No | Recommendation                                                                                                                                                                                                                                                                                                                                        | Reported on page No/ line No |
|--------------------------------------------------------|---------|-------------------------------------------------------------------------------------------------------------------------------------------------------------------------------------------------------------------------------------------------------------------------------------------------------------------------------------------------------|------------------------------|
| Measurement of effectiveness                           | 11a     | <i>Single study-based estimates:</i> Describe fully the design features of the single effectiveness study and why the single study was a sufficient source of clinical effectiveness data.                                                                                                                                                            | Page 8                       |
|                                                        | 11b     | <i>Synthesis-based estimates:</i> Describe fully the methods used for identification of included studies and synthesis of clinical effectiveness data.                                                                                                                                                                                                | N/A                          |
| Measurement and valuation of preference based outcomes | 12      | If applicable, describe the population and methods used to elicit preferences for outcomes.                                                                                                                                                                                                                                                           | Page 11                      |
| Estimating resources and costs                         | 13a     | <i>Single study-based economic evaluation:</i> Describe approaches used to estimate resource use associated with the alternative interventions. Describe primary or secondary research methods for valuing each resource item in terms of its unit cost. Describe any adjustments made to approximate to opportunity costs.                           | Pages 10-11                  |
|                                                        | 13b     | <i>Model-based economic evaluation:</i> Describe approaches and data sources used to estimate resource use associated with model health states. Describe primary or secondary research methods for valuing each resource item in terms of its unit cost. Describe any adjustments made to approximate to opportunity costs.                           | N/A                          |
| Currency, price date, and conversion                   | 14      | Report the dates of the estimated resource quantities and unit costs. Describe methods for adjusting estimated unit costs to the year of reported costs if necessary. Describe methods for converting costs into a common currency base and the exchange rate.                                                                                        | Page 11                      |
| Choice of model                                        | 15      | Describe and give reasons for the specific type of decision-analytical model used. Providing a figure to show model structure is strongly recommended.                                                                                                                                                                                                | N/A                          |
| Assumptions                                            | 16      | Describe all structural or other assumptions underpinning the decision-analytical model.                                                                                                                                                                                                                                                              | N/A                          |
| Analytical methods                                     | 17      | Describe all analytical methods supporting the evaluation. This could include methods for dealing with skewed, missing, or censored data; extrapolation methods; methods for pooling data; approaches to validate or make adjustments (such as half cycle corrections) to a model; and methods for handling population heterogeneity and uncertainty. | Pages 11-13 and Appendix     |
|                                                        |         |                                                                                                                                                                                                                                                                                                                                                       |                              |



| Section/item                                                         | Item No | Recommendation                                                                                                                                                                                                                                                              | Reported on page No/ line No |
|----------------------------------------------------------------------|---------|-----------------------------------------------------------------------------------------------------------------------------------------------------------------------------------------------------------------------------------------------------------------------------|------------------------------|
| <b>Results</b>                                                       |         |                                                                                                                                                                                                                                                                             |                              |
| Study parameters                                                     | 18      | Report the values, ranges, references, and, if used, probability distributions for all parameters. Report reasons or sources for distributions used to represent uncertainty where appropriate. Providing a table to show the input values is strongly recommended.         | N/A                          |
| Incremental costs and outcomes                                       | 19      | For each intervention, report mean values for the main categories of estimated costs and outcomes of interest, as well as mean differences between the comparator groups. If applicable, report incremental cost-effectiveness ratios.                                      | Table 1, pages 13-16         |
| Characterising uncertainty                                           | 20a     | <i>Single study-based economic evaluation:</i> Describe the effects of sampling uncertainty for the estimated incremental cost and incremental effectiveness parameters, together with the impact of methodological assumptions (such as discount rate, study perspective). | Figures 2 and 3, pages 15-16 |
|                                                                      | 20b     | <i>Model-based economic evaluation:</i> Describe the effects on the results of uncertainty for all input parameters, and uncertainty related to the structure of the model and assumptions.                                                                                 | N/A                          |
| Characterising heterogeneity                                         | 21      | If applicable, report differences in costs, outcomes, or cost-effectiveness that can be explained by variations between subgroups of patients with different baseline characteristics or other observed variability in effects that are not reducible by more information.  | N/A                          |
| <b>Discussion</b>                                                    |         |                                                                                                                                                                                                                                                                             |                              |
| Study findings, limitations, generalisability, and current knowledge | 22      | Summarise key study findings and describe how they support the conclusions reached. Discuss limitations and the generalisability of the findings and how the findings fit with current knowledge.                                                                           | Pages 17-20                  |
| <b>Other</b>                                                         |         |                                                                                                                                                                                                                                                                             |                              |
| Source of funding                                                    | 23      | Describe how the study was funded and the role of the funder in the identification, design, conduct, and reporting of the analysis. Describe other non-monetary sources of support.                                                                                         | Page 3                       |
| Conflicts of interest                                                | 24      | Describe any potential for conflict of interest of study contributors in accordance with journal policy. In the absence of a journal policy, we recommend authors comply with International Committee of Medical Journal Editors recommendations.                           | Page 3                       |

# BMJ Open

## Cost-effectiveness of ranibizumab and bevacizumab for age-related macular degeneration: 2-year findings from the IVAN randomised trial

|                                 |                                                                                                                                                                                                                                                                                                                                                                                                                                                                                                                                                                                                                                                                                                                                                                                                                                                                                                                                                                                                                           |
|---------------------------------|---------------------------------------------------------------------------------------------------------------------------------------------------------------------------------------------------------------------------------------------------------------------------------------------------------------------------------------------------------------------------------------------------------------------------------------------------------------------------------------------------------------------------------------------------------------------------------------------------------------------------------------------------------------------------------------------------------------------------------------------------------------------------------------------------------------------------------------------------------------------------------------------------------------------------------------------------------------------------------------------------------------------------|
| Journal:                        | <i>BMJ Open</i>                                                                                                                                                                                                                                                                                                                                                                                                                                                                                                                                                                                                                                                                                                                                                                                                                                                                                                                                                                                                           |
| Manuscript ID:                  | bmjopen-2014-005094.R1                                                                                                                                                                                                                                                                                                                                                                                                                                                                                                                                                                                                                                                                                                                                                                                                                                                                                                                                                                                                    |
| Article Type:                   | Research                                                                                                                                                                                                                                                                                                                                                                                                                                                                                                                                                                                                                                                                                                                                                                                                                                                                                                                                                                                                                  |
| Date Submitted by the Author:   | 19-Jun-2014                                                                                                                                                                                                                                                                                                                                                                                                                                                                                                                                                                                                                                                                                                                                                                                                                                                                                                                                                                                                               |
| Complete List of Authors:       | Dakin, Helen; Health Economics Research Centre, University of Oxford, Nuffield Department of Population Health<br>Wordsworth, Sarah; Health Economics Research Centre, University of Oxford, Nuffield Department of Population Health<br>rogers, chris; University of Bristol, Clinical Science South Bristol<br>Abangma, Giselle; Swiss Re Services Ltd, Research and Development<br>Raftery, James; Southampton University, Primary Care & Population Sciences<br>Harding, Simon; Department of Eye and Vision Science, University of Liverpool, Institute of Ageing and Chronic Disease<br>Lotery, Andrew; University of Southampton<br>Downes, Susan; Oxford University Hospitals, Oxford Eye Hospital<br>Chakravarthy, Usha; Queens University of Belfast, Ophthalmology<br>Reeves, Barnaby; University of Bristol, Bristol Heart Institute<br>on behalf of the, IVAN Study Investigators; The IVAN study investigators are listed online (available at <a href="http://aaojournal.org">http://aaojournal.org</a> ), |
| <b>Primary Subject Heading</b>: | Health economics                                                                                                                                                                                                                                                                                                                                                                                                                                                                                                                                                                                                                                                                                                                                                                                                                                                                                                                                                                                                          |
| Secondary Subject Heading:      | Ophthalmology                                                                                                                                                                                                                                                                                                                                                                                                                                                                                                                                                                                                                                                                                                                                                                                                                                                                                                                                                                                                             |
| Keywords:                       | Neovascular age-related macular degeneration (AMD), vascular endothelial growth factor (VEGF) inhibitors, trial-based economic evaluation, cost-utility analysis, cost-minimisation analysis, cost-effectiveness                                                                                                                                                                                                                                                                                                                                                                                                                                                                                                                                                                                                                                                                                                                                                                                                          |
|                                 |                                                                                                                                                                                                                                                                                                                                                                                                                                                                                                                                                                                                                                                                                                                                                                                                                                                                                                                                                                                                                           |

SCHOLARONE™  
Manuscripts

# Cost-effectiveness of ranibizumab and bevacizumab for age-related macular degeneration: 2-year findings from the IVAN randomised trial

**Authors:** Helen A Dakin *Senior Researcher*,<sup>1</sup> Sarah Wordsworth *University Research Lecturer*,<sup>1</sup> Chris A Rogers *Reader in Medical Statistics*,<sup>2</sup> Giselle Abangma *Health Research Analyst*,<sup>3</sup> James Raftery *Professor of Health Technology Assessment*,<sup>4</sup> Simon P Harding *Professor of Clinical Ophthalmology*,<sup>5</sup> Andrew J Lotery *Professor of Ophthalmology*,<sup>6</sup> Susan M Downes *Consultant Ophthalmologist*,<sup>7</sup> Usha Chakravarthy *Clinical Professor*,<sup>8†</sup> Barnaby C Reeves *Professor of Health Services Research*,<sup>2†</sup> on behalf of the IVAN Study Investigators\*

\* The IVAN study investigators are listed online (available at <http://aaojournal.org>) in Appendix 1 of reference <sup>6</sup>.

† These authors contributed equally to the manuscript and the trial.

<sup>1</sup> Health Economics Research Centre, Nuffield Department of Population Health, University of Oxford, Old Road Campus, Headington, Oxford, OX3 7LF, UK

<sup>2</sup> Clinical Trials and Evaluation Unit, School of Clinical Sciences, University of Bristol, Bristol, BS2 8HW, UK.

<sup>3</sup> Swiss Re Services Ltd, Research and Development. London EC3A 8EP, UK

<sup>4</sup> Primary Care & Population Sciences, University of Southampton, SO16 6YD, UK

<sup>5</sup> Department of Eye and Vision Science, Institute of Ageing and Chronic Disease, University of Liverpool, Daulby Street, Liverpool, L69 3GAL, UK.

<sup>6</sup> Academic Unit of Clinical and Experimental Sciences, Faculty of Medicine, University of Southampton, SO16 6YD, UK

<sup>7</sup> Oxford Eye Hospital, Oxford University Hospitals NHS Trust, Oxford, OX3 9DU, UK.

<sup>8</sup> Centre for Experimental Medicine, The Queen's University of Belfast, Belfast, BT12 6BA, UK.

**Running header:** Cost-effectiveness of ranibizumab and bevacizumab for AMD

## Guarantor and corresponding author:

Helen Dakin, Health Economics Research Centre, Nuffield Department of Population Health, University of Oxford, Old Road Campus, Headington, Oxford, UK. Tel: +44 (0) 1865 289422; Email: [helen.dakin@dph.ox.ac.uk](mailto:helen.dakin@dph.ox.ac.uk)

**Word count:** 4402

**Key words**

Neovascular age-related macular degeneration (AMD); vascular endothelial growth factor (VEGF) inhibitors; trial-based economic evaluation; cost-utility analysis; cost-minimisation analysis; cost-effectiveness.

For peer review only

## Abstract

**Objective:** To assess the incremental cost and cost-effectiveness of continuous and discontinuous regimens of bevacizumab (Avastin®) and ranibizumab (Lucentis®) for neovascular age-related macular degeneration (nAMD) from a UK National Health Service (NHS) perspective.

**Design:** A within-trial cost-utility analysis with two-year time horizon, based on a multi-centre factorial, non-inferiority randomised controlled trial.

**Setting:** 23 hospital ophthalmology clinics.

**Participants:** 610 patients aged  $\geq 50$  years with untreated nAMD in the study eye.

**Interventions:** 0.5 mg ranibizumab or 1.25 mg bevacizumab given continuous (monthly) or discontinuous (as-needed) for two years.

**Main Outcome Measures:** Quality-adjusted life-years (QALYs).

**Results:** Total two-year costs ranged from £3,002/patient (\$4,700; 95% CI: £2,601 to £3,403) for discontinuous bevacizumab to £18,590/patient (\$29,106; 95% CI: £18,258 to £18,922) for continuous ranibizumab. Ranibizumab was significantly more costly than bevacizumab for both continuous (+£14,989/patient [\$23,468; 95% CI: £14,522 to £15,456;  $p < 0.001$ ]) and discontinuous treatment (+£8,498 [\$13,305]; 95% CI: £7,700 to £9,295;  $p < 0.001$ ), with negligible difference in QALYs. Continuous ranibizumab would only be cost-effective compared with continuous bevacizumab if the NHS were willing to pay £3.5 million (\$5.5 million) per additional QALY gained. Patients receiving continuous bevacizumab accrued higher total costs (+£599 [\$938] 95% CI: £91 to £1,107;  $p = 0.021$ ) than those receiving discontinuous bevacizumab, but also accrued non-significantly more QALYs (+0.020; 95% CI: -0.032 to 0.071;  $p = 0.452$ ). Continuous bevacizumab therefore cost £30,220 (\$47,316) per QALY gained versus discontinuous bevacizumab. However, bootstrapping demonstrated that if the NHS is willing to pay £20,000/QALY gained, there is a 37% chance that continuous bevacizumab is cost-effective versus discontinuous bevacizumab.

**Conclusions:** Ranibizumab is not cost-effective compared with bevacizumab, being substantially more costly and producing little or no QALY gain. Discontinuous bevacizumab is likely to be the most cost-effective of the four treatment strategies evaluated in IVAN, although there is a 37% chance that continuous bevacizumab is cost-effective.

**Trial registration:** ISRCTN92166560

### Article summary: Strengths and limitations of this study

- We conducted a trial-based economic evaluation based on high-quality data on costs and quality of life prospectively collected within a randomised trial.
- This demonstrated that bevacizumab would achieve substantial cost-savings over ranibizumab with negligible differences in quality of life. In England, switching patients to bevacizumab could save at least £102 (\$160) million per year. However, bevacizumab is not currently licensed for neovascular age-related macular degeneration (nAMD).
- Our study is the first trial-based economic evaluation to evaluate the cost-effectiveness of alternative anti-VEGF treatments for nAMD.
- Of the strategies for the treatment of nAMD evaluated in this trial, we found discontinuous (as-needed) bevacizumab to be the least costly and most cost-effective. However, there was substantial uncertainty around this finding and sensitivity analyses suggested that the cost-effectiveness of using continuous (monthly) treatment rather than discontinuous treatment may vary between centres.

## Introduction

Neovascular age-related macular degeneration (nAMD) is a common disorder of the ageing eye and if left untreated leads to severe central visual impairment. The current standard of care is treatment with biologicals that bind to or inhibit vascular endothelial growth factor (VEGF). Biologicals need to be injected into the vitreous cavity of the eye at 4-8 week intervals. However, the first treatment convincingly shown to be effective in preventing vision loss (ranibizumab, Lucentis®<sup>1 2</sup>) is expensive (£742/dose in the UK<sup>3</sup>). Another anti-VEGF biological, bevacizumab (Avastin®), is licensed to treat cancer and has been used to treat nAMD, using smaller doses that cost much less than ranibizumab. Small non-randomised studies on bevacizumab have reported outcomes that were as good as those achievable with ranibizumab.<sup>4</sup> Comparative effectiveness randomised controlled trials (RCTs) of ranibizumab versus bevacizumab were therefore needed to provide unbiased estimates of relative efficacy and safety. The UK Inhibition of VEGF in Age-related choroidal Neovascularisation (IVAN) trial<sup>5 6</sup> and the US Comparison of Age-related macular degeneration Treatments Trials (CATT)<sup>7 8</sup> were amongst the first such trials to report findings.

Two-year IVAN results demonstrated that ranibizumab and bevacizumab produced similar improvements in visual function, with no significant difference in arteriothrombotic events or hospital admissions for heart failure, which have previously been linked with anti-VEGF therapy.<sup>5</sup> IVAN also compared discontinuous (as-needed) treatment against continuous monthly injections. Continuous and discontinuous treatment produced similar improvements in visual function, although mortality was significantly lower with continuous treatment ( $p=0.05$ ).

Given the rising demands for healthcare and limited budgets, it is important to assess cost-effectiveness as well as the clinical effectiveness and safety of medical interventions. Evidence on incremental cost and cost-effectiveness is of particular importance in nAMD, owing to the potential savings and health implications of either reducing treatment frequency or substituting a much cheaper alternative (bevacizumab) for a more expensive drug (ranibizumab). Although ranibizumab costs many times more than bevacizumab, it is important to consider all relevant costs and

1  
2  
3 assess cost-effectiveness to determine whether the more expensive therapy has added  
4 health benefits that justify the additional costs or lead to savings that offset the price  
5 difference.  
6  
7

8  
9  
10 A recent systematic review<sup>9</sup> identified nine economic evaluations of ranibizumab  
11 and three of bevacizumab. Seven further studies evaluating ranibizumab<sup>10-16</sup> and two  
12 evaluating bevacizumab<sup>11-16</sup> have since been published. Most studies found  
13 ranibizumab to be cost-effective versus other treatments, such as pegaptanib. Five  
14 studies concluded that bevacizumab was likely to be cost-effective compared with  
15 ranibizumab, of which four relied on observational data<sup>11-15</sup> or assumptions about  
16 relative efficacy.<sup>17-18</sup> We are unaware of any other RCT-based economic evaluation  
17 that has estimated the cost-effectiveness of anti-VEGF treatment for nAMD.  
18  
19  
20  
21  
22

23  
24 A key objective of the IVAN trial was to assess the incremental cost and  
25 incremental cost-effectiveness of continuous and discontinuous regimens of  
26 bevacizumab and ranibizumab in nAMD from the perspective of the UK National  
27 Health Service (NHS). The results of these analyses are reported here.  
28  
29  
30  
31  
32  
33

## 34 **Methods**

35  
36 The study was based on the two-year results from the IVAN trial  
37 (ISRCTN92166560), which provided high-quality data on resource use and outcomes  
38 and comprises the only UK trial directly comparing these interventions. Trial design  
39 and methods have been described previously<sup>5,6</sup>; in brief this was a factorial, multi-  
40 centre non-inferiority trial in which 610 patients not previously treated for nAMD in  
41 their study eyes were randomised to either bevacizumab (1.25 mg/dose) or  
42 ranibizumab (0.5 mg/dose) and to either discontinuous treatment or continuous  
43 monthly injections for two years. Discontinuous treatment comprised an initial course  
44 of three monthly injections, followed by further courses of three injections given  
45 monthly if pre-specified clinical and optical coherence tomography (OCT) re-  
46 treatment criteria were met. The economic evaluation took a two-year time horizon to  
47 estimate within-trial cost-effectiveness since incremental costs and QALYs appeared  
48 to be relatively stable over time. Following UK guidelines,<sup>19</sup> we took the perspective  
49 of the UK NHS, which excludes costs incurred by patients and their families or  
50  
51  
52  
53  
54  
55  
56  
57  
58  
59  
60



1  
2  
3 employers. Detailed methods and additional results will be published as a monograph  
4 in *Health Technology Assessment*.  
5  
6  
7

8 Since IVAN was factorial, it was important to consider the likelihood of  
9 interactions: that is, whether the differences in costs and/or quality of life between  
10 bevacizumab and ranibizumab differ between treatment regimens. Although no  
11 interactions were anticipated for visual acuity,<sup>6</sup> large interactions between drug and  
12 treatment regimen were expected for costs and cost-effectiveness, since reducing the  
13 number of injections would have a proportionately greater effect on drug costs for  
14 ranibizumab than for less expensive bevacizumab. Interactions for quality of life or  
15 costs were also possible if the number of injections required for discontinuous  
16 treatment differed between drugs. We therefore estimated the mean costs and mean  
17 quality-adjusted life-years (QALYs) for each of the four treatment combinations and  
18 interpreted the results based on four pair-wise comparisons:  
19  
20  
21  
22  
23  
24  
25

- 26 • Continuous ranibizumab versus discontinuous ranibizumab;
- 27 • Continuous bevacizumab versus discontinuous bevacizumab;
- 28 • Continuous ranibizumab versus continuous bevacizumab;
- 29 • Discontinuous ranibizumab versus discontinuous bevacizumab.
- 30  
31  
32  
33  
34

35 We report two forms of economic evaluation. Comparisons between drugs were  
36 based on cost-minimisation analysis, which compares costs between treatments that  
37 are assumed to have identical health effects.<sup>20</sup> Cost-minimisation analysis is  
38 appropriate only if the difference in cost is so large that no plausible difference in  
39 efficacy could cause the more costly treatment to be cost-effective.<sup>21 22</sup> This approach  
40 is justified for the comparisons between drugs because the large difference in drug  
41 costs was inevitably going to be the main influence on the incremental cost-  
42 effectiveness of ranibizumab versus bevacizumab. We therefore pre-specified that  
43 ranibizumab and bevacizumab would be compared using cost-minimisation analysis  
44 unless ranibizumab-treated patients accrued  $\geq 0.05$  more EQ-5D QALYs than those  
45 receiving bevacizumab. By contrast, we used cost-utility analysis, in which health  
46 outcomes are measured in QALYs, to compare continuous and discontinuous  
47 treatment, where incremental costs are smaller.  
48  
49  
50  
51  
52  
53  
54  
55  
56  
57  
58  
59  
60

### *Measurement and valuation of resource use*

Our base case analysis also focused on resource use associated with the study eye or associated with adverse events (AEs) or serious adverse events (SAEs) that were “*expected*”: i.e. previously linked to anti-VEGF treatment (Appendix). Concomitant medications, hospitalisations and ambulatory consultations that were neither associated with the study eye nor attributable to expected AEs or expected SAEs were excluded to avoid including episodes of high healthcare resource use unrelated to treatment (e.g. renal failure or cancer), which might otherwise have swamped the main effect of treatment on costs.<sup>23</sup>

After enrolment, participants were monitored for disease activity on a monthly basis with visual acuity assessments, colour fundus imaging and OCT. Fundus fluorescein angiography (FFA) was undertaken at specified visits and when OCT was insufficient to reach a decision on disease activity. A pre-specified algorithm was used to determine the need for re-treatment. Patients allocated to discontinuous treatment began a new course of three monthly injections whenever they met re-treatment criteria. However, costing analyses excluded protocol-driven resource use; in particular, we assumed that patients would not require colour fundus photography, OCT or FFA unless this would affect treatment decisions. As such, patients on discontinuous treatment were assumed not to require these investigations at the second or third visit in a course of three injections, when treatment was mandated (Figure 1). Similarly, patients on continuous treatment were assumed to require monitoring consultations only once every three months, on the grounds that ophthalmologists would want information about disease progression periodically, irrespective of whether treatment decisions are required.

Micro-costing was used to estimate the cost of injection and monitoring consultations since the available national average costs<sup>24 25</sup> are not nAMD-specific and do not differentiate between consultations for monitoring and intravitreal drug delivery. Staff at 13 of the 23 IVAN centres completed questionnaires on overheads, the cost of setting up clinic facilities and equipment and/or the staff required to run injection and monitoring clinics.

1  
2  
3 The drug acquisition cost for ranibizumab was the NHS list price (£742.17<sup>3</sup>) and  
4 that for bevacizumab was the price typically charged by the not-for-profit NHS  
5 provider used in the trial (£49/prefilled syringe). All concomitant medications,  
6 contacts with medical professionals and hospitalisations were recorded at each  
7 monthly clinic visit. Concomitant medications applied to the study eye or indicated  
8 for any expected SAE/AE were valued using list prices.<sup>3</sup> Costs of other medications,  
9 including those applied to the fellow eye, were excluded from the analysis. Unit costs  
10 for consultations with general practitioners, district or general practice nurses and  
11 hospital staff outside IVAN clinics were obtained from routine sources.<sup>25 26</sup> These  
12 costs were applied to ambulatory consultations that were either related to the eye or  
13 that occurred within 30 days of an expected SAE/AE. Hospital stays linked to  
14 expected SAEs were valued using the mean cost per bed-day for associated HRGs.<sup>25</sup>  
15  
16  
17  
18  
19  
20  
21  
22  
23

24 Resource use data and unit costs were combined to estimate quarterly costs of:  
25 bevacizumab/ranibizumab; drug administration and monitoring consultations; and  
26 hospitalisations, ambulatory consultations and medication changes for expected  
27 SAEs/AEs. Value added tax (VAT) was excluded from the economic evaluation and  
28 included in budget impact estimates, following guidelines.<sup>19</sup> Costs are reported in  
29 2011 pounds sterling, accompanied by equivalents in US dollars (exchange rate:  
30 \$1.57/pound).  
31  
32  
33  
34  
35  
36  
37

### 38 ***Measurement and valuation of health benefits***

39 The three-level EQ-5D questionnaire<sup>27</sup> was administered at baseline, 3, 12 and 24  
40 months, and (if the patient was willing and able to do so) at study exit, after any SAE  
41 and after a drop in visual acuity in the study eye of  $\geq 15$  letters on the Early Treatment  
42 Diabetic Retinopathy Study (ETDRS) vision chart between two consecutive visits  
43 (referred to subsequently as a 'reduction in visual acuity'). The Health Utilities Index  
44 questionnaire version 3 (HUI3) was administered at the same timepoints and used in  
45 sensitivity analysis; EQ-5D comprised the utility primary measure following UK  
46 guidelines.<sup>19</sup> Patients self-completed large-print EQ-5D questionnaires, with  
47 assistance from study nurses where necessary; responses were valued using the UK  
48 time-trade-off tariff to give "utilities".<sup>27</sup>  
49  
50  
51  
52  
53  
54  
55  
56  
57  
58  
59  
60

1  
2  
3 Missing utility data were imputed using multiple imputation,<sup>28</sup> which avoids bias  
4 and enables analysis of the whole sample. Multiple imputation was conducted using  
5 the `ice` command<sup>29</sup> (version 1.9.4) in Stata Version 12 (StataCorp, College Station,  
6 TX).  
7  
8  
9

10  
11 QALYs for each participant were calculated as the area under the curve. We  
12 assumed that utility changed linearly between consecutive EQ-5D measurements in  
13 the absence of SAEs. Since linear changes are unlikely for patients with SAEs, we  
14 assumed that SAEs and reductions in visual acuity caused a sudden drop in utility on  
15 the day of onset, followed by a linear rise as the patient recovered; the rate of this  
16 linear rise was estimated using mixed models (Appendix).  
17  
18  
19  
20  
21  
22

### 23 *Statistical methods*

24 Linear regression models were used to estimate the effect of drug and treatment  
25 regimen on QALYs, drug costs, administration/monitoring costs and  
26 medication/medical service use in each three-month period or “quarter” (Appendix).  
27 Interactions between drug and treatment regimen were included in the models for  
28 quarters 2-8 if they were either statistically significant or were larger than the main  
29 effect for drug or for treatment regimen. The analysis of QALYs, drug costs and  
30 medication/medical service use in quarters 2-8 therefore took account of interactions,  
31 while drug and treatment regimen were assumed to have additive effects on  
32 administration/monitoring costs. A variant on Kaplan-Meier sample averaging<sup>30 31</sup>  
33 was used to account for patients withdrawing early from the trial and exclude  
34 differences in mortality unrelated to treatment; regression predictions of quarterly  
35 costs and QALYs were weighted by the proportion of patients alive at the start of each  
36 quarter. Costs and QALYs accrued in Year 2 were discounted at 3.5% to allow for  
37 time preference (i.e. the tendency to prefer benefits sooner and costs later).<sup>19</sup>  
38 Uncertainty around quarterly costs and QALYs was quantified by estimating models  
39 separately for 130 nonparametric bootstrap draws on each of 100 datasets generated in  
40 multiple imputation to capture the uncertainty around imputed utilities. The appendix  
41 gives further details of the statistical methodology.  
42  
43  
44  
45  
46  
47  
48  
49  
50  
51  
52  
53  
54  
55  
56  
57  
58  
59  
60

### ***Presentation of results and uncertainty***

Incremental cost-effectiveness ratios (ICERs) were calculated by dividing the difference in cost between two study arms by the difference in QALYs. Results were interpreted assuming that the UK NHS would be willing to pay £20,000 to gain one QALY (a £20,000/QALY “ceiling ratio”).<sup>32</sup> We also present net benefits for each of the four treatment arms: net benefit equals total QALYs multiplied by the ceiling ratio, minus total costs. Uncertainty around ICERs is presented as cost-effectiveness acceptability curves, which plot the probability of each of the four treatment regimens having the highest net benefits (i.e. being most cost-effective) at a range of ceiling ratios.

Sensitivity analyses evaluated the impact of changing the costs (e.g. halving the cost of ranibizumab), methods (e.g. taking a one-year time horizon) and assumptions (e.g. including the costs of all SAEs, not just ‘expected’ SAEs).

## **Results**

### ***QALYs and quality of life***

The number of QALYs accrued over the two-year trial period did not differ significantly between bevacizumab and ranibizumab, or between continuous and discontinuous treatment ( $p \geq 0.381$ ; Table 1). Patients randomised to continuous treatment accrued non-significantly more QALYs than those randomised to discontinuous treatment (mean difference: 0.020 [95% CI: -0.032, 0.071] for bevacizumab,  $p=0.452$  and 0.026 [95% CI: -0.032, 0.085] for ranibizumab,  $p=0.381$ ), while differences between ranibizumab and bevacizumab were negligible.

### ***Resource use and costs***

Patients receiving continuous treatment received a mean of 22 injections, while those on discontinuous treatment received 13. Consequently, drug costs differed substantially between continuous and discontinuous treatment (Table 1;  $p < 0.001$ ), as well as between ranibizumab and bevacizumab ( $p < 0.001$ ). Since reducing treatment frequency produces larger savings for ranibizumab than for bevacizumab, there were significant interactions between drug and treatment regimen for drug cost ( $p < 0.001$ ).

1  
2  
3  
4  
5 Administration of bevacizumab or ranibizumab cost £61 (\$96; standard deviation,  
6 SD: £14) per injection, while each consultation for monitoring cost £72 (\$113; SD:  
7 £41), plus £39 (\$61; SD: £16) for each FFA. Administering intravitreal injections and  
8 monitoring disease progression/remission cost between £1,825 and £1,970 per patient  
9 over the two-year trial period (Table 1). Discontinuous treatment reduced the number  
10 of injections required, but increased the number of monitoring consultations needed to  
11 assess disease status against retreatment criteria, since we assumed that OCT would  
12 only be done when it would inform treatment decisions. Since continuous treatment  
13 requires, on average, nine more injections ( $p < 0.001$ ), but avoids only six monitoring  
14 visits ( $p < 0.001$ ), drug administration and monitoring costs were higher with  
15 continuous treatment than discontinuous treatment (mean difference: £130 per patient  
16 (\$204); 95% CI: £20, £239;  $p = 0.021$ ), with no significant difference between  
17 bevacizumab and ranibizumab ( $p = 0.80$ ).

18  
19  
20  
21  
22  
23  
24  
25  
26  
27  
28 The cost of medication changes, hospitalisations and ambulatory consultations  
29 associated with expected SAEs and expected AEs was relatively small (mean: £469  
30 [£735] per patient), but varied substantially between patients (95 percentile range: £0,  
31 £1,401). There was no significant difference in such costs between drugs or treatment  
32 regimens ( $p \geq 0.163$ ).

33  
34  
35  
36  
37  
38 Taking account of the drug cost, drug administration/monitoring and  
39 medication/medical service use, the mean total cost per patient over the two-year trial  
40 ranged from £18,590 (\$29,119) for continuous ranibizumab to £3,002 (\$4,702) for  
41 discontinuous bevacizumab (Table 1). Drug cost accounted for 80-88% of the total  
42 cost for patients randomised to ranibizumab and 21-30% of the cost for patients  
43 randomised to bevacizumab. Drug administration and monitoring accounted for 54-  
44 61% of the costs accrued by patients randomised to bevacizumab and 10-15% of costs  
45 for those randomised to ranibizumab.

#### 52 53 ***Base case comparison between ranibizumab and bevacizumab***

54 Since the difference in mean QALYs between ranibizumab and bevacizumab was less  
55 than the pre-specified non-inferiority margin (0.05 QALYs), cost-minimisation  
56 analysis was used to compare the two drugs on the basis of cost alone. Overall,  
57  
58  
59  
60

1  
2  
3 continuous ranibizumab cost £14,989 more per patient (\$23,476 [95% CI: £14,522,  
4 £15,456], Table 1) than continuous bevacizumab over the two-year trial period  
5 (p<0.001). Discontinuous ranibizumab cost £8,498 more per patient (\$13,308 [95%  
6 CI: £7,700, £9,295], p<0.001) compared with discontinuous bevacizumab.  
7  
8 Bootstrapping analyses estimated the probability that switching from ranibizumab to  
9 bevacizumab would save money and found that this exceeds 99.9%.  
10  
11  
12

### 13 14 ***Base case comparison between continuous and discontinuous treatment***

15  
16 Overall, using continuous rather than discontinuous treatment increased costs by  
17 £7,090 (\$11,102 [95% CI: £6,337, £7,844], p<0.001) for ranibizumab and £599 (\$938  
18 [95% CI: £91, £1,107], p=0.021) for bevacizumab.  
19  
20  
21

22  
23 However, patients randomised to continuous bevacizumab also accrued non-  
24 significantly more QALYs than those randomised to discontinuous bevacizumab  
25 (Table 1; p=0.452). In line with best practice,<sup>20</sup> we took account of the non-  
26 significant differences in QALYs and allowed for the joint distribution of costs and  
27 QALYs, since assuming no difference in health outcomes can introduce bias and give  
28 misleading conclusions.<sup>21 22</sup> Dividing the difference in cost by the difference in  
29 QALYs suggests that continuous bevacizumab costs £30,220 (\$47,316) per additional  
30 QALY gained compared with discontinuous bevacizumab. This ICER is somewhat  
31 higher than the £20,000 (\$31,000) per QALY "ceiling ratio" below which the NHS  
32 generally considers treatments to be cost-effective.<sup>32</sup> However, the imprecision around  
33 QALY differences means that there is substantial uncertainty around this ICER.  
34  
35 Bootstrapping demonstrated that there is a 37% chance that continuous bevacizumab  
36 is cost-effective compared with discontinuous bevacizumab at a £20,000/QALY  
37 ceiling ratio, which increases to 50% at £30,000/QALY.  
38  
39  
40  
41  
42  
43  
44  
45  
46  
47

48 Continuous ranibizumab cost £270,217 (\$423,074) per QALY gained compared  
49 with discontinuous ranibizumab. Due to the substantial savings possible by giving  
50 ranibizumab less frequently, we can be >99.99% confident that continuous  
51 ranibizumab is poor value for money compared with discontinuous ranibizumab at a  
52 £20,000/QALY ceiling ratio.  
53  
54  
55  
56  
57  
58  
59  
60

### ***Base case four-way comparison***

It is also informative to consider the four trial treatment groups as four mutually-exclusive alternative strategies for managing nAMD. Framing the decision in this way demonstrates that discontinuous bevacizumab is the most cost-effective treatment strategy evaluated in IVAN, generating higher net benefits than the other three treatment strategies (Table 1), where net benefit equals QALYs multiplied by ceiling ratio (in this case £20,000/QALY) minus costs. Continuous ranibizumab would only be cost-effective compared with continuous bevacizumab if the NHS were willing to pay £3.5 million (\$5.5 million) per additional QALY gained. Discontinuous ranibizumab is not cost-effective at any ceiling ratio, as it is more costly and less effective than continuous or discontinuous bevacizumab.

However, there remains substantial uncertainty around incremental QALY gains. This is illustrated by the cost-effectiveness acceptability curves plotting the probability of each treatment being the most cost-effective of the four strategies at different ceiling ratios (Figure 2). This demonstrates that, although we can be 98% confident that discontinuous bevacizumab is less costly than continuous bevacizumab, our confidence in the conclusion that discontinuous bevacizumab has highest net benefits decreases rapidly as the value we place on the small, non-significant QALY gains increases. At a £20,000/QALY ceiling ratio, there is a 63% probability that discontinuous bevacizumab is the most cost-effective strategy considered in IVAN and a 37% probability that continuous bevacizumab is the most cost-effective. By contrast, the probability of either continuous or discontinuous ranibizumab being the most cost-effective strategy for managing nAMD is <1% unless the NHS were willing to pay more than £100,000/QALY gained.

### ***Sensitivity analyses***

Sensitivity analyses demonstrated that the conclusions are very robust to changes in the assumptions and methods used to measure costs and utilities and conduct the analysis (Figure 3). Notably, no sensitivity analysis changed the conclusion that ranibizumab is not cost-effective compared with bevacizumab, including analyses discounting the ranibizumab list price by 50%. However, three sensitivity analyses changed the conclusion that continuous bevacizumab is not cost-effective compared with discontinuous bevacizumab: assuming that FFA is only conducted at baseline,



1  
2  
3 not at any subsequent monitoring consultation; measuring quality of life using HUI3  
4 rather than EQ-5D; and using unadjusted Kaplan-Meier estimates of the probability of  
5 surviving at any point in time to account for censoring, rather than excluding  
6 differences in deaths that were unrelated to study medication (see Appendix).  
7  
8  
9

10  
11 Threshold analyses demonstrated that the price of ranibizumab would need to be  
12 reduced to £63.46 per dose (a 91% price reduction) in order for continuous  
13 ranibizumab to be cost-effective compared with continuous bevacizumab at a  
14 £20,000/QALY ceiling ratio.  
15  
16  
17  
18  
19

## 20 21 Discussion

22 This study demonstrates that in the setting of the UK IVAN trial, we can be >99%  
23 confident that ranibizumab represents very poor value for money compared with  
24 bevacizumab at the £20,000 (\$31,000) per QALY ceiling ratio used within NHS  
25 decision-making.<sup>32</sup> Continuous ranibizumab would only be cost-effective compared  
26 with continuous bevacizumab if the NHS were willing to pay >£3.5 (\$5.5)  
27 million/QALY gained. Furthermore, our analysis also shows that giving  
28 discontinuous bevacizumab, rather than discontinuous ranibizumab could save the UK  
29 NHS £8,498 (\$13,341) per patient treated, with little or no impact on the health gains  
30 from treatment. If the 17,295 eyes requiring anti-VEGF therapy each year in  
31 England<sup>33</sup> were switched from discontinuous ranibizumab to discontinuous  
32 bevacizumab, the NHS could save at least £102 (\$160) million per year (including  
33 20% VAT) based on the treatment regimens evaluated in IVAN. It remains  
34 controversial as to whether a drug (bevacizumab) that has not been approved and  
35 licensed for nAMD by regulatory agencies should be used when a licensed drug  
36 (ranibizumab) is available. In the UK, clinicians may prescribe unlicensed  
37 medications within approved research projects, when no suitable medicine is licensed,  
38 or when the licensed alternative is unavailable,<sup>34</sup> although prescribing on cost grounds  
39 is not mentioned. By contrast, in the US, ophthalmologists use bevacizumab freely.<sup>35</sup>  
40 National guidance (rather than local hospital/clinician policies) is therefore needed in  
41 the UK to direct the choice between bevacizumab and ranibizumab. CATT and  
42 IVAN provide robust data to guide regulators in this decision, demonstrating that  
43 ranibizumab and bevacizumab have comparable effects on vision and similar safety  
44  
45  
46  
47  
48  
49  
50  
51  
52  
53  
54  
55  
56  
57  
58  
59  
60

1  
2  
3 profiles,<sup>5 7</sup> but that (based on the current analysis of IVAN) ranibizumab costs £3.5  
4 million per QALY compared with bevacizumab.  
5  
6  
7

8 The base case analysis found that continuous bevacizumab cost £30,220  
9 (\$47,445) per QALY gained compared with discontinuous bevacizumab, suggesting  
10 that discontinuous bevacizumab is the most cost-effective strategy evaluated in IVAN  
11 if the NHS is willing to pay up to £20,000/QALY gained. However, there remains  
12 substantial uncertainty around this conclusion and there is a 37% chance that  
13 continuous bevacizumab is cost-effective. The finding of non-significantly higher  
14 QALYs with continuous treatment contradicts our prior hypothesis that avoiding  
15 monthly injections might improve quality of life, although the observed difference  
16 could be due to chance. Nonetheless, discontinuous bevacizumab would remain the  
17 most cost-effective strategy even if there were no difference in quality of life between  
18 treatment regimens. Other considerations may affect the choice of anti-VEGF delivery  
19 model. In particular, since discontinuous treatment requires regular clinical review  
20 and access to retinal imaging, it may be more practical to provide treatment every  
21 month, with monitoring restricted to specified points in time (e.g. six or 12 months  
22 after initiation of therapy). Indeed the label for the newest anti-VEGF (aflibercept)  
23 incorporates a limited clinical monitoring regime.<sup>36</sup> The discontinuous treatment  
24 regimen evaluated in the IVAN trial was chosen partly to minimise the possibility of  
25 disadvantage to participants in these groups and partly to minimise the number of  
26 retreatment decisions required. Neither monthly treatment nor treatments given as  
27 blocks of three are used widely in routine practice, although following publication of  
28 IVAN,<sup>5 6</sup> there appears to be increased interest in the “IVAN regimen”. The cost-  
29 effectiveness of monthly versus intermittent treatment will therefore vary between  
30 treatment centres depending on local costs and clinical practice.  
31  
32  
33  
34  
35  
36  
37  
38  
39  
40  
41  
42  
43  
44  
45  
46  
47

48 Unlike previous studies, our analysis is based on high-quality data from an RCT  
49 with prospective measurements of costs and quality of life, which was powered to  
50 exclude any clinically-meaningful difference in visual acuity. It therefore provides  
51 unequivocally-unbiased estimates of incremental costs and QALYs. Nevertheless,  
52 our analysis confirms the findings of previous economic evaluations, namely that  
53 ranibizumab is not cost-effective compared with bevacizumab.<sup>11 16 18</sup> We are also (to  
54 our knowledge) the first to evaluate the cost-effectiveness of the discontinuous  
55  
56  
57  
58  
59  
60

1  
2  
3 treatment regimen used in IVAN. In addition to following best practice for trial-based  
4 economic evaluation, this study includes several novel aspects, such as measuring  
5 quality of life after SAEs, excluding chance differences in deaths unrelated to  
6 treatment and allowing for the factorial design by including only large or statistically  
7 significant interactions.  
8  
9  
10

11  
12  
13 The study also estimates the cost of consultations to administer  
14 ranibizumab/bevacizumab and monitor outcomes, which could be used in other  
15 economic evaluations. Micro-costing shows the main drivers of consultation costs  
16 and highlighted substantial variation in costs between centres; this variation means  
17 that the cost-effectiveness of continuous versus discontinuous bevacizumab (but not  
18 ranibizumab versus bevacizumab) will vary between centres. It is important to note  
19 that the costs were calculated to assess incremental cost-effectiveness in IVAN and  
20 should not be used to set the prices at which hospitals are reimbursed. In particular,  
21 they are bottom-up estimates that exclude unpaid overtime and VAT and make  
22 assumptions about overheads and proportion of staff-time spent on patient contacts. In  
23 most settings it is likely that the costs to healthcare commissioners will be higher and  
24 subject to local negotiations with care providers.  
25  
26  
27  
28  
29  
30  
31  
32  
33

34  
35 The base case analysis focused on mortality attributable to study medication and  
36 the costs associated with “expected” SAEs/AEs and excluded other costs. This  
37 reduced the risk that chance differences in resource use not associated with study  
38 medication could distort our conclusions. However, it also meant that the  
39 unanticipated increase in the incidence of other SAEs (e.g. gastrointestinal events)  
40 with bevacizumab<sup>5 6</sup> (which comprised the only difference in SAEs between drugs)  
41 was not taken into account in the costing analysis. However, sensitivity analyses  
42 including the cost of all SAEs/AEs gave the same conclusions. Although hospitals  
43 receive a commercial-in-confidence discount off the list price of ranibizumab and the  
44 price of bevacizumab varies between hospitals, the conclusions were robust to  
45 substantial changes in drug price. The study focused on the period of follow-up in the  
46 trial and excluded costs and benefits beyond Year 2. However, since incremental costs  
47 and QALYs remained reasonably stable over time this is unlikely to have affected the  
48 conclusions. The analysis also uses data only from IVAN, rather than synthesising all  
49 available evidence.  
50  
51  
52  
53  
54  
55  
56  
57  
58  
59  
60

1  
2  
3  
4  
5  
6  
7  
8  
9  
10  
11  
12  
13  
14  
15  
16  
17  
18  
19  
20  
21  
22  
23  
24  
25  
26  
27  
28  
29  
30  
31  
32  
33  
34  
35  
36  
37  
38  
39  
40  
41  
42  
43  
44  
45  
46  
47  
48  
49  
50  
51  
52  
53  
54  
55  
56  
57  
58  
59  
60

Further research is needed to assess the extent to which the cost-effectiveness findings generalise to other countries with different relative prices and management of nAMD and SAEs/AEs. For example, the incidence of SAEs was substantially lower in IVAN than CATT,<sup>5,7</sup> although sensitivity analyses doubling the impact of SAEs on costs and QALYs suggested that this did not change the conclusions. The costs of the two drugs may vary between centres within the UK as hospitals may use different bevacizumab suppliers or have different discounts on ranibizumab. Nevertheless, because we collected very detailed information on resource use, policy makers in other countries can review these data against their own to examine their similarity and, hence, the applicability of our findings to their setting. Future work combining data from IVAN with that from other trials, such as CATT,<sup>7</sup> may help reduce uncertainty and evaluate the extent to which the results can be generalised. However we believe that our primary finding of ranibizumab representing very poor value for money compared with bevacizumab does apply throughout the world.

### **Funding and role of study sponsors**

The IVAN trial is funded by the National Institute for Health Research (NIHR) Health Technology Assessment (HTA) programme (project number 07/36/01) and a full report will be published in *Health Technology Assessment*. Visit the HTA programme website ([www.hta.ac.uk](http://www.hta.ac.uk)) for further project information. The views and opinions expressed are those of the authors and do not necessarily reflect those of the HTA programme, NIHR, the UK National Health Service or the Department of Health. The funder had no involvement in: the collection, analysis, and interpretation of data; in the writing of the report; and in the decision to submit the article for publication. The authors had full access to the data (including statistical reports and tables), can take responsibility for the integrity of the data and the accuracy of the data analysis and are responsible for submitting this paper.

### **Competing interest statement**

All authors have completed the Unified Competing Interest form at [www.icmje.org/coi\\_disclosure.pdf](http://www.icmje.org/coi_disclosure.pdf) (available on request from the corresponding author). All authors had financial support from the NIHR for the submitted work. HD, SW, GA and JR have no financial or non-financial interests relevant to the submitted

1  
2  
3 work. UC, SH, SD and AL are principal investigators of trials sponsored by Novartis,  
4 the manufacturers of ranibizumab. UC has attended and been remunerated for  
5 attendance at advisory boards for Novartis, Bayer, Neovista, Oraya, Allergan, and  
6 Bausch and Lomb; and her employing institution has received payments from  
7 Novartis, Bayer, Neovista, Oraya, Alcon, and Pfizer. SH has attended and been  
8 remunerated for attendance at advisory boards for and received travel support from  
9 Novartis and Allergan. CR has received an honorarium from Novartis for a lecture.  
10 SD's and AL's employing institutions have received payments from Novartis. SD and  
11 AL have received honoraria from Novartis for lectures. AL has attended and been  
12 remunerated for attendance at advisory boards for Novartis and Bayer; likewise SD  
13 for Bayer and Ely Lilly. BR has received a fee for teaching from Janssen-Cilag.  
14  
15  
16  
17  
18  
19  
20  
21  
22

### 23 **Copyright/licence**

24 The Corresponding Author has the right to grant on behalf of all authors and does  
25 grant on behalf of all authors, a worldwide licence to the Publishers and its licensees  
26 in perpetuity, in all forms, formats and media (whether known now or created in the  
27 future), to i) publish, reproduce, distribute, display and store the Contribution, ii)  
28 translate the Contribution into other languages, create adaptations, reprints, include  
29 within collections and create summaries, extracts and/or, abstracts of the Contribution,  
30 iii) create any other derivative work(s) based on the Contribution, iv) to exploit all  
31 subsidiary rights in the Contribution, v) the inclusion of electronic links from the  
32 Contribution to third party material where-ever it may be located; and, vi) licence any  
33 third party to do any or all of the above.  
34  
35  
36  
37  
38  
39  
40  
41  
42

### 43 **Authorship statement**

44 SW, CR, JR, SH, AL, SD, BR and UC conceived, designed and conducted the IVAN  
45 trial. HD, SW, GA and JR conceived and designed the economic evaluation, with  
46 extensive input from CR, SH and BR. CR supervised collation/cleaning of trial data,  
47 while HD, SW and GA collected additional resource use data from centres. HD  
48 conducted the economic analysis with help from GA under the supervision of SW.  
49 HD drafted the manuscript. All authors edited the manuscript for important  
50 intellectual content and approved the final version.  
51  
52  
53  
54  
55  
56  
57  
58  
59  
60

### **Acknowledgements**

The IVAN Study Investigators are listed in Appendix 1 of reference.<sup>6</sup>

We would also like to thank the IVAN participants and the clinicians, nurses and clinic managers who completed resource use questionnaires.

### **Transparency declaration**

The manuscript's guarantor (HD) affirms that the manuscript is an honest, accurate, and transparent account of the study being reported; that no important aspects of the study have been omitted; and that any discrepancies from the study as planned (and, if relevant, registered) have been explained.

### **Data sharing**

No additional data available

### **Ethics statement**

Participants provided written informed consent. A UK National Health Service Research Ethics Committee approved the trial (07/NIR03/37).

## References

1. Brown DM, Michels M, Kaiser PK, et al. Ranibizumab versus verteporfin photodynamic therapy for neovascular age-related macular degeneration: Two-year results of the ANCHOR study. *Ophthalmology* 2009;**116**(1):57-65.e5.
2. Rosenfeld PJ, Brown DM, Heier JS, et al. Ranibizumab for neovascular age-related macular degeneration. *N Engl J Med* 2006;**355**(14):1419-31.
3. British Medical Association. *British National Formulary 62* (<http://bnf.org/bnf/index.htm>). London: Pharmaceutical Press, September 2011.
4. Mitchell P. A systematic review of the efficacy and safety outcomes of anti-VEGF agents used for treating neovascular age-related macular degeneration: comparison of ranibizumab and bevacizumab. *Current Medical Research & Opinion* 2011;**27**(7):1465-75.
5. Chakravarthy U, Harding SP, Rogers CA, et al. Alternative treatments to inhibit VEGF in age-related choroidal neovascularisation: 2-year findings of the IVAN randomised controlled trial. *Lancet* 2013;**382**(9900):1258-67.
6. The IVAN Study Investigators, Chakravarthy U, Harding SP, et al. Ranibizumab versus Bevacizumab to Treat Neovascular Age-related Macular Degeneration: One-Year Findings from the IVAN Randomized Trial. *Ophthalmology* 2012;**119**(7):1399-411.
7. Martin DF, Maguire MG, Fine SL, et al. Ranibizumab and Bevacizumab for Treatment of Neovascular Age-related Macular Degeneration: Two-Year Results. *Ophthalmology* 2012;**119**(7):1388-98.
8. Martin DF, Maguire MG, Ying GS, et al. Ranibizumab and bevacizumab for neovascular age-related macular degeneration. *N Engl J Med* 2011;**364**(20):1897-908.
9. Mitchell P, Annemans L, White R, et al. Cost effectiveness of treatments for wet age-related macular degeneration. *Pharmacoeconomics* 2011;**29**(2):107-31.
10. Yanagi Y, Aihara Y, Fukuda T, et al. [Cost-effectiveness of ranibizumab, photodynamic therapy and pegaptanib sodium in the treatment of neovascular age-related macular degeneration in Japanese]. *Nihon Ganka Gakkai Zasshi* 2011;**115**(9):825-31.
11. Patel JJ, Mendes MA, Bounthavong M, et al. Cost-utility analysis of bevacizumab versus ranibizumab in neovascular age-related macular degeneration using a Markov model. *J Eval Clin Pract* 2012;**18**(2):247-55.
12. Gower EW, Cassard SD, Bass EB, et al. A cost-effectiveness analysis of three treatments for age-related macular degeneration. *Retina* 2010;**30**(2):212-21.
13. Hernandez-Pastor LJ, Ortega A, Garcia-Layana A, et al. Cost-effectiveness of ranibizumab compared with pegaptanib in neovascular age-related macular degeneration. *Graefes Archive for Clinical & Experimental Ophthalmology* 2010;**248**(4):467-76.
14. Neubauer AS, Holz FG, Sauer S, et al. Cost-effectiveness of ranibizumab for the treatment of neovascular age-related macular degeneration in Germany: Model analysis from the perspective of Germany's statutory health insurance system. *Clinical Therapeutics* 2010;**32**(7):1343-56.
15. Smiddy WE. Economic implications of current age-related macular degeneration treatments. *Ophthalmology* 2009;**116**(3):481-7.

16. Stein JD, Newman-Casey PA, Mrinalini T, et al. Cost-effectiveness of bevacizumab and ranibizumab for newly diagnosed neovascular macular degeneration. *Ophthalmology* 2014;**121**(4):936-45.
17. Fletcher EC, Lade RJ, Adewoyin T, et al. Computerized model of cost-utility analysis for treatment of age-related macular degeneration. *Ophthalmology* 2008;**115**(12):2192-8.
18. Raftery J, Clegg A, Jones J, et al. Ranibizumab (Lucentis) versus bevacizumab (Avastin): modelling cost effectiveness. *Br J Ophthalmol* 2007;**91**(9):1244-6.
19. National Institute for Health and Care Excellence. Guide to the methods of technology appraisal 2013. Secondary Guide to the methods of technology appraisal 2013 2013.  
<http://www.nice.org.uk/media/D45/1E/GuideToMethodsTechnologyAppraisal2013.pdf>.
20. Drummond MF, Sculpher MJ, Torrance GW, et al. *Methods for the economic evaluation of health care programmes*. 3rd ed. New York: Oxford University Press, 2005.
21. Dakin H, Wordsworth S. Cost-minimisation analysis versus cost-effectiveness analysis, revisited. *Health Econ* 2013;**22**(1):22-34.
22. Briggs AH, O'Brien BJ. The death of cost-minimization analysis? *Health Econ* 2001;**10**(2):179-84.
23. Jonsson B, Weinstein MC. Economic evaluation alongside multinational clinical trials. Study considerations for GUSTO IIb. *Int J Technol Assess Health Care* 1997;**13**(1):49-58.
24. Department of Health. PbR operational guidance and tariffs: 2011-12 tariff information spreadsheet. Secondary PbR operational guidance and tariffs: 2011-12 tariff information spreadsheet 2011.  
[http://www.dh.gov.uk/en/Publicationsandstatistics/Publications/PublicationsPolicyAndGuidance/DH\\_124356](http://www.dh.gov.uk/en/Publicationsandstatistics/Publications/PublicationsPolicyAndGuidance/DH_124356).
25. Department of Health. National Schedule of Reference Costs 2010-11 for NHS Trusts and PCTs combined. Secondary National Schedule of Reference Costs 2010-11 for NHS Trusts and PCTs combined November 2011.  
[http://www.dh.gov.uk/prod\\_consum\\_dh/groups/dh\\_digitalassets/documents/digitalasset/dh\\_131148.xls](http://www.dh.gov.uk/prod_consum_dh/groups/dh_digitalassets/documents/digitalasset/dh_131148.xls).
26. Curtis L. Unit Costs of Health and Social Care 2011. Pages 91, 129-150, 177-213. Secondary Unit Costs of Health and Social Care 2011. Pages 91, 129-150, 177-213 2011. <http://www.pssru.ac.uk/archive/pdf/uc/uc2011/uc2011.pdf>.
27. Dolan P. Modeling valuations for EuroQol health states. *Med Care* 1997;**35**(11):1095-108.
28. White IR, Royston P, Wood AM. Multiple imputation using chained equations: Issues and guidance for practice. *Stat Med* 2011;**30**(4):377-99.
29. Royston P. Multiple imputation of missing values: further update of ice, with an emphasis on interval censoring. *Stata Journal* 2007;**7**:445-64.
30. Hallstrom AP, Sullivan SD. On estimating costs for economic evaluation in failure time studies. *Med Care* 1998;**36**(3):433-6.
31. Gray A, Clarke P, Wolstenholme J, et al. *Applied Methods of Cost-Effectiveness Analysis in Health Care* Oxford: Oxford University Press, 2011.
32. National Institute for Health and Clinical Excellence. Social value judgements: Principles for the development of NICE guidance. Second Edition. Secondary Social value judgements: Principles for the development of NICE guidance.



- 1  
2  
3 Second Edition 2008.  
4 <http://www.nice.org.uk/media/C18/30/SVJ2PUBLICATION2008.pdf>.
- 5 33. National Institute for Health and Clinical Excellence. Ranibizumab and  
6 pegaptanib for the treatment of age-related macular degeneration TA155:  
7 Costing template and report. Secondary Ranibizumab and pegaptanib for the  
8 treatment of age-related macular degeneration TA155: Costing template and  
9 report August 2008.  
10 (<http://www.nice.org.uk/nicemedia/live/12057/41735/41735.xls>).
- 11 34. General Medical Council. Good practice in prescribing and managing medicines  
12 and devices. Secondary Good practice in prescribing and managing medicines  
13 and devices 2013. [http://www.gmc-](http://www.gmc-uk.org/static/documents/content/Prescribing_guidance.pdf)  
14 [uk.org/static/documents/content/Prescribing\\_guidance.pdf](http://www.gmc-uk.org/static/documents/content/Prescribing_guidance.pdf).
- 15 35. Curtis LH, Hammill BG, Schulman KA, et al. Risks of mortality, myocardial  
16 infarction, bleeding, and stroke associated with therapies for age-related  
17 macular degeneration.[Erratum appears in Arch Ophthalmol. 2010  
18 Dec;128(12):1623]. Archives of Ophthalmology 2010;**128**(10):1273-9.
- 19 36. Bayer Plc. Summary of product characteristics for Eylea 40mg/ml solution for  
20 injection in a vial Secondary Summary of product characteristics for Eylea  
21 40mg/ml solution for injection in a vial 2013.  
22 [http://www.medicines.org.uk/emc/medicine/27224/SPC/Eylea+40mg+ml+sol](http://www.medicines.org.uk/emc/medicine/27224/SPC/Eylea+40mg+ml+solution+for+injection+in+a+vial/)  
23 [ution+for+injection+in+a+vial/](http://www.medicines.org.uk/emc/medicine/27224/SPC/Eylea+40mg+ml+solution+for+injection+in+a+vial/).
- 24  
25  
26  
27  
28  
29  
30  
31  
32  
33  
34  
35  
36  
37  
38  
39  
40  
41  
42  
43  
44  
45  
46  
47  
48  
49  
50  
51  
52  
53  
54  
55  
56  
57  
58  
59  
60

**Table 1:** Results of the economic evaluation

|                                          | Total QALYs (95% CI)‡                 | Mean (95% CI) drug cost‡                | Mean (95% CI) administration & monitoring cost | Mean (95% CI) medication/medical service cost‡ | Total cost (95% CI)‡                    | Total net benefits (95% CI)†‡              |
|------------------------------------------|---------------------------------------|-----------------------------------------|------------------------------------------------|------------------------------------------------|-----------------------------------------|--------------------------------------------|
| Discontinuous bevacizumab                | 1.584 (1.538, 1.630)                  | £651 (£605, £698)                       | £1,825 (£1,708, £1,941)                        | £526 (£144, £908)                              | £3,002 (£2,601, £3,403)                 | £28,683 (£27,707, £29,658)                 |
| Continuous bevacizumab                   | 1.604 (1.563, 1.645)                  | £1,065 (£1,048, £1,081)                 | £1,952 (£1,860, £2,043)                        | £585 (£250, £919)                              | £3,601 (£3,259, £3,943)                 | £28,480 (£27,548, £29,412)                 |
| Discontinuous ranibizumab                | 1.582 (1.530, 1.634)                  | £9,229 (£8,584, £9,875)                 | £1,838 (£1,724, £1,952)                        | £432 (£253, £611)                              | £11,500 (£10,798, £12,202)              | £20,142 (£18,963, £21,321)                 |
| Continuous ranibizumab                   | 1.608 (1.565, 1.651)                  | £16,286 (£16,011, £16,562)              | £1,970 (£1,883, £2,057)                        | £334 (£215, £452)                              | £18,590 (£18,258, £18,922)              | £13,576 (£12,769, £14,383)                 |
| Difference: ranibizumab vs. bevacizumab  | Continuous: 0.004 (-0.046, 0.054)     | Continuous: £15,222 (£14,948, £15,495)* | £16 (-£109, £141)                              | Continuous: -£251 (-£604, £102)                | Continuous: £14,989 (£14,522, £15,456)* | Continuous: -£14,904 (-£15,995, -£13,813)* |
|                                          | Discontinuous: -0.002 (-0.064, 0.060) | Discontinuous: £8,578 (£7,932, £9,225)* |                                                | Discontinuous: -£94 (-£514, £326)              | Discontinuous: £8,498 (£7,700, £9,295)* | Discontinuous: -£8,541 (-£9,939, -£7,144)* |
| Difference: continuous vs. discontinuous | Ranibizumab: 0.026 (-0.032, 0.085)    | Ranibizumab: £7,057 (£6,364, £7,750)*   | £130 (£20, £239)*                              | Ranibizumab: -£98 (-£310, £113)                | Ranibizumab: £7,090 (£6,337, £7,844)*   | Ranibizumab: -£6,566 (-£7,861, -£5,271)*   |
|                                          | Bevacizumab: 0.020 (-0.032, 0.071)    | Bevacizumab: £413 (£365, £462)*         |                                                | Bevacizumab: £59 (-£438, £556)                 | Bevacizumab: £599 (£91, £1,107)*        | Bevacizumab: -£203 (-£1,372, £967)         |
| Interaction                              | 0.006 (-0.071, 0.084)                 | £6,643 (£5,949, £7,338)*                | £5 (-£31, £42)                                 | -£157 (-£696, £381)                            | £6,491 (£5,604, £7,379)*                | -£6,363 (-£8,088, -£4,638)*                |

\* Significantly different from zero (p<0.05).

† Net benefits equal QALYs multiplied by ceiling ratio minus costs; the net benefits shown in this table were calculated at a £20,000/QALY ceiling ratio.

‡ Analysis allowed for interactions

1  
2  
3  
4  
5  
6  
7  
8  
9  
10  
11  
12  
13  
14  
15  
16  
17  
18  
19  
20  
21  
22  
23  
24  
25  
26  
27  
28  
29  
30  
31  
32  
33  
34  
35  
36  
37  
38  
39  
40  
41  
42  
43  
44  
45  
46  
47  
48  
49**FIGURE LEGENDS**

**Figure 1:** Schematic illustrating the assumptions made about the frequency of injection and monitoring consultations within the costing analysis. The consultations required by patients on discontinuous treatment will depend on when they met treatment failure criteria; Patient 2 met the re-treatment criteria at visits 0, 7 and 11.

✓ Relevant consultation cost was applied.

? The cost of FFA was applied if clinically indicated: for discontinuous patients, this was applied whenever the patient had FFA in the trial; for continuous patients, the proportion of patients having FFA was based on estimated use in routine clinical practice.

✗ No consultation cost was applied as the participant missed the visit.

**Figure 2:** Cost-effectiveness acceptability curve showing the probability that each treatment is the most cost-effective strategy evaluated in IVAN at a range of ceiling ratios. For example, at a ceiling ratio of £20,000/QALY gained (shown by the vertical dashed line), there is a 63% probability that discontinuous bevacizumab is best and a 37% probability that continuous bevacizumab is best, while the probability that either ranibizumab treatment regimen is best is approximately 0% (total = 100%).

**Figure 3:** Effect of sensitivity analyses on total net benefits for each of the four treatment arms, assuming a £20,000/QALY ceiling ratio. Treatments that are more cost-effective have higher net benefits; the treatment furthest to the right is therefore most cost-effective, while the treatment furthest to the left is the least cost-effective. Error bars represent 95% confidence intervals. In the analysis “doubling SAE impact”, both the medication/medical service use cost and the impact of SAEs on QALYs were doubled. The “best case” analysis simultaneously changed several assumptions in favour of ranibizumab: 50% discount off ranibizumab list price; assuming that 15.9% of bevacizumab (as occurred in the trial) but no ranibizumab is wasted; assuming that bevacizumab costs £100 per dose; and including medical service use costs associated with expected and unexpected AEs and SAEs.

1  
2  
3  
4  
5  
6  
7  
8  
9  
10  
11  
12  
13  
14  
15  
16  
17  
18  
19  
20  
21  
22  
23  
24  
25  
26  
27  
28  
29  
30  
31  
32  
33  
34  
35  
36  
37  
38  
39  
40  
41  
42  
43  
44  
45  
46  
47  
48  
49  
50  
51  
52  
53  
54  
55  
56  
57  
58  
59  
60

For peer review only

# Cost-effectiveness of ranibizumab and bevacizumab for age-related macular degeneration: 2-year findings from the IVAN randomised trial

**Authors:** Helen A Dakin *Senior Researcher*,<sup>1</sup> Sarah Wordsworth *University Research Lecturer*,<sup>1</sup> Chris A Rogers *Reader in Medical Statistics*,<sup>2</sup> Giselle Abangma *Health Research Analyst*,<sup>3</sup> James Raftery *Professor of Health Technology Assessment*,<sup>4</sup> Simon P Harding *Professor of Clinical Ophthalmology*,<sup>5</sup> Andrew J Lotery *Professor of Ophthalmology*,<sup>6</sup> Susan M Downes *Consultant Ophthalmologist*,<sup>7</sup> Usha Chakravarthy *Clinical Professor*,<sup>8†</sup> Barnaby C Reeves *Professor of Health Services Research*,<sup>2†</sup> on behalf of the IVAN Study Investigators\*

\* The IVAN study investigators are listed online (available at <http://aaojournal.org>) in Appendix 1 of reference <sup>1</sup>.

† These authors contributed equally to the manuscript and the trial.

<sup>1</sup> Health Economics Research Centre, Nuffield Department of Population Health, University of Oxford, Old Road Campus, Headington, Oxford, OX3 7LF, UK

<sup>2</sup> Clinical Trials and Evaluation Unit, School of Clinical Sciences, University of Bristol, Bristol, BS2 8HW, UK.

<sup>3</sup> Swiss Re Services Ltd, Research and Development. London EC3A 8EP, UK

<sup>4</sup> [Primary Care & Population Sciences Wessex Institute for Health Research and Development](#), University of Southampton, SO16 6YD7NS, UK

<sup>5</sup> Department of Eye and Vision Science, Institute of Ageing and Chronic Disease, University of Liverpool, Daulby Street, Liverpool, L69 3GAL, UK.

<sup>6</sup> Academic Unit of Clinical and Experimental Sciences, Faculty of Medicine, University of Southampton, SO16 6YD, UK

<sup>7</sup> Oxford Eye Hospital, Oxford University Hospitals NHS Trust, Oxford, OX3 9DU, UK.

<sup>8</sup> Centre for Experimental Medicine, The Queen's University of Belfast, Belfast, BT12 6BA, UK.

**Running header:** Cost-effectiveness of ranibizumab and bevacizumab for AMD

## Guarantor and corresponding author:

Helen Dakin, Health Economics Research Centre, Nuffield Department of Population Health, University of Oxford, Old Road Campus, Headington, Oxford, UK. Tel: +44 (0) 1865 289422; ~~Fax: +44 (0) 1865 289271~~; Email: [helen.dakin@dph.ox.ac.uk](mailto:helen.dakin@dph.ox.ac.uk)

Word count: 4402 273

### **Funding and role of study sponsors**

The IVAN trial is funded by the National Institute for Health Research (NIHR) Health Technology Assessment (HTA) programme (project number 07/36/01) and a full report will be published in *Health Technology Assessment*. Visit the HTA programme website ([www.hta.ac.uk](http://www.hta.ac.uk)) for further project information. The views and opinions expressed are those of the authors and do not necessarily reflect those of the HTA programme, NIHR, the UK National Health Service or the Department of Health. The funder had no involvement in: the collection, analysis, and interpretation of data; in the writing of the report; and in the decision to submit the article for publication. The authors had full access to the data (including statistical reports and tables), can take responsibility for the integrity of the data and the accuracy of the data analysis and are responsible for submitting this paper.

### **Competing interest statement**

All authors have completed the Unified Competing Interest form at [www.icmje.org/coi\\_disclosure.pdf](http://www.icmje.org/coi_disclosure.pdf) (available on request from the corresponding author). All authors had financial support from the NIHR for the submitted work. HD, SW, GA and JR have no financial or non financial interests relevant to the submitted work. UC, SH, SD and AL are principal investigators of trials sponsored by Novartis, the manufacturers of ranibizumab. UC has attended and been remunerated for attendance at advisory boards for Novartis, Bayer, Neovista, Oraya, Allergan, and Bausch and Lomb; and her employing institution has received payments from Novartis, Bayer, Neovista, Oraya, Alcon, and Pfizer. SH has attended and been remunerated for attendance at advisory boards for and received travel support from Novartis and Allergan. CR has received an honorarium from Novartis for a lecture. SD's and AL's employing institutions have received payments from Novartis. SD and AL have received honoraria from Novartis for lectures. AL has attended and been remunerated for attendance at advisory boards for Novartis and Bayer; likewise SD for Bayer and Ely Lilly. BR has received a fee for teaching from Janssen-Cilag.

### **Copyright/licence**

The Corresponding Author has the right to grant on behalf of all authors and does grant on behalf of all authors, a worldwide licence to the Publishers and its licensees in perpetuity, in all forms, formats and media (whether known now or created in the future), to i) publish, reproduce, distribute, display and store the Contribution, ii) translate the Contribution into other languages, create adaptations, reprints, include within collections and create summaries, extracts and/or, abstracts of the Contribution, iii) create any other derivative work(s) based on the Contribution, iv) to exploit all subsidiary rights in the Contribution, v) the inclusion of electronic links from the Contribution to third party material where ever it may be located; and, vi) licence any third party to do any or all of the above.

### **Authorship statement**

SW, CR, JR, SH, AL, SD, BR and UC conceived, designed and conducted the IVAN trial. HD, SW, GA and JR conceived and designed the economic evaluation, with extensive input from CR, SH and BR. CR supervised collation/cleaning of trial data, while HD, SW and GA collected additional resource use data from centres. HD conducted the economic analysis with help from GA under the supervision of SW. HD drafted the manuscript. All authors edited the manuscript for important intellectual content and approved the final version.

### **Acknowledgements**

The IVAN Study Investigators are listed in Appendix 1 of reference.<sup>†</sup>

We would also like to thank the IVAN participants and the clinicians, nurses and clinic managers who completed resource use questionnaires.

### **Transparency declaration**

The manuscript's guarantor (HD) affirms that the manuscript is an honest, accurate, and transparent account of the study being reported; that no important aspects of the study have been omitted; and that any discrepancies from the study as planned (and, if relevant, registered) have been explained.

**Data sharing**

No additional data available

**Ethics statement**

Participants provided written informed consent. A UK National Health Service Research Ethics Committee approved the trial (07/NIR03/37).

**Key words**

Neovascular age-related macular degeneration (nAMD); vascular endothelial growth factor (VEGF) inhibitors; trial-based economic evaluation; cost-utility analysis; cost-minimisation analysis; cost-effectiveness.



## Abstract

**Objective:** To assess the incremental cost and cost-effectiveness of continuous and discontinuous regimens of bevacizumab (Avastin®) and ranibizumab (Lucentis®) for neovascular age-related macular degeneration (nAMD) from a UK National Health Service (NHS) perspective.

**Design:** A within-trial cost-utility analysis with two-year time horizon, based on a multi-centre factorial, non-inferiority randomised controlled trial.

**Setting:** 23 hospital ophthalmology clinics.

**Participants:** 610 patients aged  $\geq 50$  years with untreated nAMD in the study eye.

**Interventions:** 0.5 mg ranibizumab or 1.25 mg bevacizumab given continuous (monthly) or discontinuous (as-needed) for two years.

**Main Outcome Measures:** Quality-adjusted life-years (QALYs).

**Results:** Total two-year costs ranged from £3,002/patient (\$4,700; 95% CI: £2,601 to £3,403) for discontinuous bevacizumab to £18,590/patient (\$29,106; 95% CI: £18,258 to £18,922) for continuous ranibizumab. Ranibizumab was significantly more costly than bevacizumab for both continuous ~~treatment~~ (+£14,989/patient [\$23,468; 95% CI: £14,522 to £15,456;  $p < 0.001$ ]) and discontinuous treatment (+£8,498 [\$13,305]; 95% CI: £7,700 to £9,295;  $p < 0.001$ ), with negligible difference in QALYs. Continuous ranibizumab would only be cost-effective compared with continuous bevacizumab if the NHS were willing to pay £3.5 million (\$5.5 million) per additional QALY gained. Patients receiving continuous bevacizumab accrued higher total costs (+£599 [\$938] 95% CI: £91 to £1,107;  $p = 0.021$ ) than those receiving discontinuous bevacizumab, but also accrued non-significantly more QALYs (+0.020; 95% CI: -0.032 to 0.071;  $p = 0.452$ ). Continuous bevacizumab therefore cost £30,220 (\$47,316) per QALY gained ~~versus compared with~~ discontinuous bevacizumab. However, bootstrapping demonstrated that if the NHS is willing to pay £20,000/QALY gained, there is a 37% chance that continuous bevacizumab is cost-effective- ~~versus compared with~~ discontinuous bevacizumab.

**Conclusions:** Ranibizumab is not cost-effective compared with bevacizumab, being substantially more costly and producing little ~~or~~ no QALY gain. Discontinuous bevacizumab is likely to be the most cost-effective of the four treatment strategies evaluated in IVAN, although there is a 37% chance that continuous bevacizumab is cost-effective.

**Trial registration:** ISRCTN92166560

### Article summary: Strengths and limitations of this study

- We conducted a trial-based economic evaluation based on high-quality data on costs and quality of life prospectively collected within a randomised trial.
- This demonstrated that bevacizumab would achieve substantial cost-savings over ranibizumab with negligible differences in quality of life. In England, switching patients to bevacizumab could save at least £102 (\$160) million per year. However, bevacizumab is not currently licensed for neovascular age-related macular degeneration (nAMD).
- Our study is the first trial-based economic evaluation to evaluate the cost-effectiveness of alternative anti-VEGF pharmacological treatment regimens for nAMD.
- Of the strategies for the treatment of nAMD evaluated in this trial, we found discontinuous (~~as-needed~~as-needed) bevacizumab to be the least costly and most cost-effective. However, there was substantial uncertainty around this finding and sensitivity analyses suggested that the cost-effectiveness of using continuous (monthly) treatment rather than discontinuous treatment may vary between centres.

Formatted: Font color: Auto

## Introduction

Neovascular age-related macular degeneration (nAMD) is a common disorder of the ageing eye and if left untreated leads to severe central visual impairment. The current standard of care is treatment with biologicals that bind to or inhibit vascular endothelial growth factor (VEGF). Biologicals need to be injected into the vitreous cavity of the eye at 4-8 week intervals. However, the first treatment convincingly shown to be effective in preventing vision loss (ranibizumab, Lucentis®<sup>2 3</sup>) is expensive (£742/dose [in the UK](#)<sup>4</sup>). Another anti-VEGF biological, bevacizumab (Avastin®), is licensed to treat ~~bowel~~ cancer and has been used to treat nAMD, using smaller doses that cost much less than ranibizumab. Small non-randomised studies on bevacizumab have reported outcomes that were as good as those achievable with ranibizumab.<sup>5</sup> Comparative effectiveness randomised controlled trials (RCTs) of ranibizumab versus bevacizumab were therefore needed to provide unbiased estimates of relative efficacy and safety. The UK Inhibition of VEGF in Age-related choroidal Neovascularisation (IVAN) trial<sup>6</sup> and the US Comparison of Age-related macular degeneration Treatments Trials (CATT)<sup>7 8</sup> were amongst the first such trials to report findings.

Two-year IVAN results demonstrated that ranibizumab and bevacizumab produced similar improvements in visual function, with no significant difference in arteriothrombotic events or hospital admissions for heart failure, which have previously been linked with anti-VEGF therapy.<sup>6</sup> IVAN also compared discontinuous (as-needed) treatment against continuous monthly injections. Continuous and discontinuous treatment produced similar improvements in visual function, although mortality was significantly lower with continuous treatment ( $p=0.05$ ).

Given the rising demands for healthcare and limited budgets, it is important to assess cost-effectiveness as well as the clinical effectiveness and safety of medical interventions. Evidence on incremental cost and cost-effectiveness is of particular importance in nAMD, owing to the potential savings and health implications of either reducing treatment frequency or substituting a much cheaper alternative (bevacizumab) for a more expensive drug (ranibizumab). Although ranibizumab costs many times more than bevacizumab, it is important to consider all relevant costs and

1  
2  
3  
4  
5  
6 assess cost-effectiveness to determine whether the more expensive therapy has added  
7 health benefits that justify the additional costs or lead to savings that offset the price  
8 difference.  
9

10  
11 A recent systematic review<sup>9</sup> identified nine economic evaluations of ranibizumab  
12 and three of bevacizumab. ~~Seven~~ further studies evaluating ranibizumab<sup>10-16</sup> and  
13 ~~two~~ ~~one~~ evaluating bevacizumab<sup>11 16</sup> have since been published. Most studies found  
14 ranibizumab to be cost-effective versus other treatments, such as pegaptanib. ~~Five~~  
15 ~~Four~~ studies concluded that bevacizumab was likely to be cost-effective compared  
16 with ranibizumab, ~~of which four~~ ~~but~~ relied on observational data<sup>11 15</sup> or assumptions  
17 about relative efficacy.<sup>17 18</sup> We are unaware of any other RCT-based economic  
18 evaluation that has estimated the cost-effectiveness of ~~bevacizumab or any study that~~  
19 ~~evaluated the cost-effectiveness of continuous versus discontinuous anti-VEGF~~  
20 ~~treatment for nAMD.~~  
21  
22  
23  
24  
25  
26

27  
28 A key objective of the IVAN trial was to assess the incremental cost and  
29 incremental cost-effectiveness of continuous and discontinuous regimens of  
30 bevacizumab and ranibizumab in nAMD from the perspective of the UK National  
31 Health Service (NHS). The results of these analyses are reported here.  
32  
33  
34  
35  
36

## 37 **Methods**

38 The study was based on the two-year results from the IVAN trial  
39 (ISRCTN92166560), which provided high-quality data on resource use and outcomes  
40 and comprises the only UK trial directly comparing these interventions. Trial design  
41 and methods have been described previously<sup>1 6</sup>; in brief this was a factorial, multi-  
42 centre non-inferiority trial in which 610 patients not previously treated for nAMD in  
43 their study eyes were randomised to either bevacizumab (~~0.5-1.25~~ mg/dose) or  
44 ranibizumab (~~1.25-0.5~~ mg/dose) and to either discontinuous treatment or continuous  
45 monthly injections for two years. Discontinuous treatment comprised an initial course  
46 of three monthly injections, followed by further courses of three injections given  
47 monthly if pre-specified clinical and optical coherence tomography (OCT) re-  
48 treatment criteria were met. The economic evaluation took a two-year time horizon to  
49 estimate within-trial cost-effectiveness since incremental costs and QALYs appeared  
50  
51  
52  
53  
54  
55  
56

1  
2  
3  
4  
5  
6 | to be relatively stable over time. Following UK guidelines,<sup>19</sup> we took the perspective  
7 of the UK NHS, which excludes costs incurred by patients and their families or  
8 employers. Detailed methods and additional results will be published as a monograph  
9 in *Health Technology Assessment*.  
10  
11

12  
13 Since IVAN was factorial, it was important to consider the likelihood of  
14 interactions: that is, whether the differences in costs and/or quality of life between  
15 bevacizumab and ranibizumab differ between treatment regimens. Although no  
16 interactions were anticipated for visual acuity,<sup>1</sup> large interactions between drug and  
17 treatment regimen were expected for costs and cost-effectiveness, since reducing the  
18 number of injections would have a proportionately greater effect on drug costs for  
19 ranibizumab than for less expensive bevacizumab. Interactions for quality of life or  
20 costs were also possible if the number of injections required for discontinuous  
21 treatment differed between drugs. We therefore estimated the mean costs and mean  
22 quality-adjusted life-years (QALYs) for each of the four treatment combinations and  
23  
24 | interpreted the results based on four pair-wise comparisons:  
25  
26  
27  
28

- 29 • Continuous ranibizumab versus discontinuous ranibizumab;
- 30 • Continuous bevacizumab versus discontinuous bevacizumab;
- 31 • Continuous ranibizumab versus continuous bevacizumab;
- 32 • Discontinuous ranibizumab versus discontinuous bevacizumab.
- 33
- 34
- 35
- 36

37 | We report two forms of economic evaluation. Comparisons between drugs were  
38 based on cost-minimisation analysis, which compares costs between treatments that  
39 are assumed to have identical health effects.<sup>20</sup> Cost-minimisation analysis is  
40 appropriate only if the difference in cost is so large that no plausible difference in  
41 efficacy could cause the more costly treatment to be cost-effective.<sup>21 22</sup> This approach  
42 is justified for the comparisons between drugs because the large difference in drug  
43 costs was inevitably going to be the main influence on the incremental cost-  
44 effectiveness of ranibizumab versus bevacizumab. We therefore pre-specified that  
45 ranibizumab and bevacizumab would be compared using cost-minimisation analysis  
46 unless ranibizumab-treated patients accrued  $\geq 0.05$  more EQ-5D QALYs than those  
47 receiving bevacizumab. By contrast, we used cost-utility analysis, in which health  
48  
49  
50  
51  
52  
53  
54  
55  
56  
57  
58  
59  
60

Formatted: Indent: First line: 0.25"

1  
2  
3  
4  
5  
6 outcomes are measured in QALYs, to compare continuous and discontinuous  
7 treatment, where incremental costs are smaller.  
8  
9  
10  
11  
12  
13  
14  
15  
16  
17  
18  
19  
20  
21  
22  
23  
24  
25  
26  
27  
28  
29  
30  
31  
32  
33  
34  
35  
36  
37  
38  
39  
40  
41  
42  
43  
44  
45  
46  
47  
48  
49  
50  
51  
52  
53  
54  
55  
56  
57  
58  
59  
60

Formatted: Indent: First line: 0.25"

### *Measurement and valuation of resource use*

Our base case analysis also focused on resource use associated with the study eye or associated with adverse events (AEs) or serious adverse events (SAEs) that were “expected”: i.e. previously linked to anti-VEGF treatment (Appendix). Concomitant medications, hospitalisations and ambulatory consultations that were neither associated with the study eye nor attributable to expected AEs or expected SAEs were excluded to avoid including episodes of high healthcare resource use unrelated to treatment (e.g. renal failure or cancer), which might otherwise have swamped the main effect of treatment on costs.<sup>23</sup>

After enrolment, participants were monitored for disease activity on a monthly basis with visual acuity assessments, colour fundus imaging and OCT. Fundus fluorescein angiography (FFA) was undertaken at specified visits and when OCT was insufficient to reach a decision on disease activity. A pre-specified algorithm was used to determine the need for re-treatment. Patients allocated to discontinuous treatment began a new course of three monthly injections whenever they met re-treatment criteria. However, costing analyses excluded protocol-driven resource use; in particular, we assumed that patients would not require colour fundus photography, OCT or FFA unless this would affect treatment decisions. As such, patients on discontinuous treatment were assumed not to require these investigations at the second or third visit in a course of three injections, when treatment was mandated (Figure 1). Similarly, patients on continuous treatment were assumed to require monitoring consultations only once every three months, on the grounds that ophthalmologists would want information about disease progression periodically, irrespective of whether treatment decisions are required.

Micro-costing was used to estimate the cost of injection and monitoring consultations since the available national average costs<sup>24 25</sup> are not nAMD-specific and do not differentiate between consultations for monitoring and intravitreal drug delivery. Staff at 13 of the 23 IVAN centres completed questionnaires on overheads, the cost of setting up clinic facilities and equipment and/or the staff required to run injection and monitoring clinics.

1  
2  
3  
4  
5  
6 The drug acquisition cost for ranibizumab was the NHS list price (£742.17<sup>4</sup>) and  
7 that for bevacizumab was the price typically charged by the not-for-profit NHS  
8 provider used in the trial (£49/prefilled syringe). All concomitant medications,  
9 contacts with medical professionals and hospitalisations were recorded at each  
10 monthly clinic visit. Concomitant medications applied to the study eye or indicated  
11 for any expected SAE/AE were valued using list prices.<sup>4</sup> Costs of other medications,  
12 including those applied to the fellow eye, were excluded from the analysis. Unit costs  
13 for consultations with general practitioners, district or general practice nurses and  
14 hospital staff outside IVAN clinics were obtained from routine sources.<sup>25 26</sup> These  
15 costs were applied to ambulatory consultations that were either related to the eye or  
16 that occurred within 30 days of an expected SAE/AE. Hospital stays linked to  
17 expected SAEs were valued using the mean cost per bed-day for associated HRGs.<sup>25</sup>

18  
19  
20  
21  
22  
23  
24  
25 Resource use data and unit costs were combined to estimate quarterly costs of:  
26 bevacizumab/ranibizumab; drug administration and monitoring consultations; and  
27 hospitalisations, ambulatory consultations and medication changes for expected  
28 SAEs/AEs. Value added tax (VAT) was excluded from the economic evaluation and  
29 included in budget impact estimates, following guidelines.<sup>19</sup> Costs are reported in  
30 2011 pounds sterling, accompanied by equivalents in US dollars (exchange rate:  
31 \$1.57/pound).

### 32 33 34 35 36 37 ***Measurement and valuation of health benefits***

38 The three-level EQ-5D questionnaire<sup>27</sup> was administered at baseline, 3, 12 and 24  
39 months, and (if the patient was willing and able to do so) at study exit, after any SAE  
40 and after a drop in visual acuity in the study eye of  $\geq 15$  letters on the Early Treatment  
41 Diabetic Retinopathy Study (ETDRS) vision chart between two consecutive visits  
42 (referred to subsequently as a ‘reduction in visual acuity’). The Health Utilities Index  
43 questionnaire version 3 (HUI3) was administered at the same timepoints and used in  
44 sensitivity analyses; EQ-5D comprised the utility primary measure following UK  
45 guidelines.<sup>19</sup> Patients self-completed large-print EQ-5D questionnaires, with  
46 assistance from study nurses where necessary; responses were valued using the UK  
47 time-trade-off tariff to give “utilities”.<sup>27</sup>



1  
2  
3  
4  
5  
6 Missing utility data were imputed using multiple imputation,<sup>28</sup> which avoids bias  
7 and enables analysis of the whole sample. Multiple imputation was conducted using  
8 the `ice` command<sup>29</sup> (version 1.9.4) in Stata Version 12 (StataCorp, College Station,  
9 TX).

Formatted: Font: (Default) Courier New

10  
11  
12  
13 QALYs for each participant were calculated as the area under the curve. We  
14 assumed that utility changed linearly between consecutive EQ-5D measurements in  
15 the absence of SAEs. Since linear changes are unlikely for patients with SAEs, we  
16 assumed that SAEs and reductions in visual acuity caused a sudden drop in utility on  
17 the day of onset, followed by a linear rise as the patient recovered; the rate of this  
18 linear rise was estimated using mixed models (Appendix).

### 23 *Statistical methods*

24  
25 Linear regression models were used to estimate the effect of drug and treatment  
26 regimen on QALYs, drug costs, administration/monitoring costs and  
27 medication/medical service use in each three-month period or “quarter” (Appendix).  
28 Interactions between drug and treatment regimen were included in the models for  
29 quarters 2-8 if they were either statistically significant or were larger than the main  
30 effect for drug or for treatment regimen. The analysis of QALYs, drug costs and  
31 medication/medical service use in quarters 2-8 therefore took account of interactions,  
32 while drug and treatment regimen were assumed to have additive effects on  
33 administration/monitoring costs. A variant on Kaplan-Meier sample averaging<sup>30 31</sup>  
34 was used to account for patients withdrawing early from the trial and exclude  
35 differences in mortality unrelated to treatment; regression predictions of quarterly  
36 costs and QALYs were weighted by the proportion of patients alive at the start of each  
37 quarter. Costs [and QALYs](#) accrued in Year 2 were discounted at 3.5% to allow for  
38 time preference (i.e. the tendency to prefer benefits sooner and costs later).<sup>19</sup>  
39  
40 Uncertainty around quarterly costs and QALYs was quantified by estimating models  
41 separately for 130 nonparametric bootstrap draws on each of 100 datasets generated in  
42 multiple imputation to capture the uncertainty around imputed utilities. The appendix  
43 gives further details of the statistical methodology.  
44  
45  
46  
47  
48  
49  
50  
51  
52  
53  
54  
55  
56  
57  
58  
59  
60

### ***Presentation of results and uncertainty***

Incremental cost-effectiveness ratios (ICERs) were calculated by dividing the difference in cost between two study arms by the difference in QALYs. Results were interpreted assuming that the UK NHS would be willing to pay £20,000 to gain one QALY (a £20,000/QALY “ceiling ratio”).<sup>32</sup> We also present net benefits for each of the four treatment arms: net benefit equals total QALYs multiplied by the ceiling ratio, minus total costs. Uncertainty around ICERs is presented as cost-effectiveness acceptability curves, which plot the probability of each of the four treatment ~~groups~~ regimens having the highest net benefits (i.e. being most cost-effective) at a range of ceiling ratios.

Sensitivity analyses evaluated the impact of changing the costs (e.g. halving the cost of ranibizumab), methods (e.g. taking a one-year time horizon) and assumptions (e.g. including the costs of all SAEs, not just ‘expected’ SAEs).

## **Results**

### ***QALYs and quality of life***

The number of QALYs accrued over the two-year trial period did not differ significantly between bevacizumab and ranibizumab, or between continuous and discontinuous treatment ( $p \geq 0.381$ ; Table 1). Patients randomised to continuous treatment accrued non-significantly more QALYs than those randomised to discontinuous treatment (mean difference: 0.020 [95% CI: -0.032, 0.071] for bevacizumab,  $p=0.452$  and 0.026 [95% CI: -0.032, 0.085] for ranibizumab,  $p=0.381$ ), while differences between ranibizumab and bevacizumab were negligible.

### ***Resource use and costs***

Patients receiving continuous treatment received a mean of 22 injections, while those on discontinuous treatment received 13. Consequently, drug costs differed substantially between continuous and discontinuous treatment (Table 1;  $p < 0.001$ ), as well as between ranibizumab and bevacizumab ( $p < 0.001$ ). Since reducing treatment frequency produces larger savings for ranibizumab than for bevacizumab, there were significant interactions between drug and treatment regimen for drug cost ( $p < 0.001$ ).

1  
2  
3  
4  
5  
6  
7  
8 Administration of bevacizumab or ranibizumab cost £61 (\$96; standard deviation,  
9 SD: £14) per injection, while each consultation for monitoring cost £72 (\$113; SD:  
10 £41), plus £39 (\$61; SD: £16) for each FFA. Administering intravitreal injections and  
11 monitoring disease progression/remission cost between £1,825 and £1,970 per patient  
12 over the two-year trial period (Table 1). Discontinuous treatment reduced the number  
13 of injections required, but increased the number of monitoring consultations needed to  
14 assess disease status against retreatment criteria, since we assumed that OCT would  
15 only be done when it would inform treatment decisions. Since continuous treatment  
16 requires, on average, nine more injections ( $p<0.001$ ), but avoids only six monitoring  
17 visits ( $p<0.001$ ), drug administration and monitoring costs were higher with  
18 continuous treatment than discontinuous treatment (mean difference: £130 per patient  
19 (\$204); 95% CI: £20, £239;  $p=0.021$ ), with no significant difference between  
20 bevacizumab and ranibizumab ( $p=0.80$ ).  
21  
22  
23  
24  
25  
26  
27

28 The cost of medication changes, hospitalisations and ambulatory consultations  
29 associated with expected SAEs and expected AEs was relatively small (mean: £469  
30 [\$735] per patient), but varied substantially between patients (95 percentile range: £0,  
31 £1,401). There was no significant difference in such costs between drugs or treatment  
32 regimens ( $p\geq 0.163$ ).  
33  
34  
35  
36

37 Taking account of the drug cost, drug administration/monitoring and  
38 medication/medical service use, the mean total cost per patient over the two-year trial  
39 ranged from £18,590 (\$29,119) for continuous ranibizumab to £3,002 (\$4,702) for  
40 discontinuous bevacizumab (Table 1). Drug cost accounted for 80-88% of the total  
41 cost for patients randomised to ranibizumab and 21-30% of the cost for patients  
42 randomised to bevacizumab. Drug administration and monitoring accounted for 54-  
43 61% of the costs accrued by patients randomised to bevacizumab and 10-15% of costs  
44 for those randomised to ranibizumab.  
45  
46  
47  
48  
49

#### 50 ***Base case comparison between ranibizumab and bevacizumab***

51 Since the difference in mean QALYs between ranibizumab and bevacizumab was less  
52 than the pre-specified non-inferiority margin (0.05 QALYs), cost-minimisation  
53 analysis was used to compare the two drugs on the basis of cost alone. Overall,  
54  
55  
56  
57

1  
2  
3  
4  
5  
6 continuous ranibizumab cost £14,989 more per patient (\$23,476 [95% CI: £14,522,  
7 £15,456], Table 1) than continuous bevacizumab over the two-year trial period  
8 (p<0.001). Discontinuous ranibizumab cost £8,498 more per patient (\$13,308 [95%  
9 CI: £7,700, £9,295], p<0.001) compared with discontinuous bevacizumab.  
10  
11 Bootstrapping analyses estimated the probability that switching from ranibizumab to  
12 bevacizumab would save money and found that this exceeds 99.9%.  
13  
14

### 15 16 ***Base case comparison between continuous and discontinuous treatment***

17  
18 Overall, using continuous rather than discontinuous treatment increased costs by  
19 £7,090 (\$11,102 [95% CI: £6,337, £7,844], p<0.001) for ranibizumab and £599 (\$938  
20 [95% CI: £91, £1,107], p=0.021) for bevacizumab.  
21  
22

23  
24 However, patients randomised to continuous bevacizumab also accrued non-  
25 significantly more QALYs than those randomised to discontinuous bevacizumab  
26 (Table 1; p=0.452). In line with best practice,<sup>20</sup> we took account of the non-  
27 significant differences in QALYs and allowed for the joint distribution of costs and  
28 QALYs, since assuming no difference in health outcomes can introduce bias and give  
29 misleading conclusions.<sup>21 22</sup> Dividing the difference in cost by the difference in  
30 QALYs suggests that continuous bevacizumab costs £30,220 (\$47,316) per additional  
31 QALY gained compared with discontinuous bevacizumab. This ICER is somewhat  
32 higher than the £20,000 (\$31,000) per QALY "ceiling ratio" below which the NHS  
33 generally considers treatments to be cost-effective.<sup>32</sup> However, the imprecision around  
34 QALY differences means that there is substantial uncertainty around this ICER.  
35  
36 Bootstrapping demonstrated that there is a 37% chance that continuous bevacizumab  
37 is cost-effective compared with discontinuous bevacizumab at a £20,000/QALY  
38 ceiling ratio, which increases to 50% at £30,000/QALY.  
39  
40  
41  
42  
43  
44  
45

46 Continuous ranibizumab cost £270,217 (\$423,074) per QALY gained compared  
47 with discontinuous ranibizumab. Due to the substantial savings possible by giving  
48 ranibizumab less frequently, we can be >99.99% confident that continuous  
49 ranibizumab is poor value for money compared with discontinuous ranibizumab at a  
50 £20,000/QALY ceiling ratio.  
51  
52  
53  
54  
55  
56  
57  
58  
59  
60

### ***Base case four-way comparison***

It is also informative to consider the four trial treatment groups as four mutually-exclusive alternative strategies for managing nAMD. Framing the decision in this way demonstrates that discontinuous bevacizumab is the most cost-effective treatment strategy evaluated in IVAN, generating higher net benefits than the other three treatment strategies (Table 1), where net benefit equals QALYs multiplied by ceiling ratio (in this case £20,000/QALY) minus costs. Continuous ranibizumab would only be cost-effective compared with continuous bevacizumab if the NHS were willing to pay £3.5 million (\$5.5 million) per additional QALY gained. Discontinuous ranibizumab is not cost-effective at any ceiling ratio, as it is more costly and less effective than continuous or discontinuous bevacizumab.

However, there remains substantial uncertainty around incremental QALY gains. This is illustrated by the cost-effectiveness acceptability curves plotting the probability of each treatment being the most cost-effective of the four strategies at different ceiling ratios (Figure 2). This demonstrates that, although we can be 98% confident that discontinuous bevacizumab is less costly than continuous bevacizumab, our confidence in the conclusion that discontinuous bevacizumab has highest net benefits decreases rapidly as the value we place on the small, non-significant QALY gains increases. At a £20,000/QALY ceiling ratio, there is a 63% probability that discontinuous bevacizumab is the most cost-effective strategy considered in IVAN and a 37% probability that continuous bevacizumab is the most cost-effective. By contrast, the probability of either continuous or discontinuous ranibizumab being the most cost-effective strategy for managing nAMD is <1% unless the NHS were willing to pay more than £100,000/QALY gained.

### ***Sensitivity analyses***

Sensitivity analyses demonstrated that the conclusions are very robust to changes in the assumptions and methods used to measure costs and utilities and conduct the analysis (Figure 3). Notably, no sensitivity analysis changed the conclusion that ranibizumab is not cost-effective compared with bevacizumab, [including analyses discounting the ranibizumab list price by 50%](#). However, three sensitivity analyses changed the conclusion that continuous bevacizumab is not cost-effective compared with discontinuous bevacizumab: assuming that FFA is only conducted at baseline,

1  
2  
3  
4  
5  
6 not at any subsequent monitoring consultation; measuring quality of life using HUI3  
7 rather than EQ-5D; and using unadjusted Kaplan-Meier estimates of the probability of  
8 surviving at any point in time to account for censoring, rather than excluding  
9 differences in deaths that were unrelated to study medication (see Appendix).  
10  
11

12  
13 Threshold analyses demonstrated that the price of ranibizumab would need to be  
14 reduced to £63.46 per dose (a 91% price reduction) in order for continuous  
15 ranibizumab to be cost-effective compared with continuous bevacizumab at a  
16 £20,000/QALY ceiling ratio.  
17  
18  
19

## 20 21 22 **Discussion**

23 | This study demonstrates that in [the setting of the UK IVAN trial](#) ~~UK setting~~, we can  
24 be >99% confident that ranibizumab represents very poor value for money compared  
25 with bevacizumab at the £20,000 (\$31,000) per QALY ceiling ratio used within NHS  
26 decision-making.<sup>32</sup> Continuous ranibizumab would only be cost-effective compared  
27 with continuous bevacizumab if the NHS were willing to pay >£3.5 (\$5.5)  
28 million/QALY gained. Furthermore, our analysis also shows that giving  
29 discontinuous bevacizumab, rather than discontinuous ranibizumab could save the UK  
30 NHS £8,498 (\$13,341) per patient treated, with little or no impact on the health gains  
31 from treatment. If the 17,295 eyes requiring anti-VEGF therapy each year in  
32 England<sup>33</sup> were switched from discontinuous ranibizumab to discontinuous  
33 bevacizumab, the NHS could save at least £102 (\$160) million per year (including  
34 20% VAT) based on the treatment regimens evaluated in IVAN. It remains  
35 controversial as to whether a drug (bevacizumab) that has not been approved and  
36 licensed for nAMD by regulatory agencies should be used when a licensed drug  
37 (ranibizumab) is available. In the UK, clinicians may prescribe unlicensed  
38 medications within approved research projects, when no suitable medicine is licensed,  
39 or when the licensed alternative is unavailable,<sup>34</sup> although prescribing on cost grounds  
40 is not mentioned. By contrast, in the US, ophthalmologists use bevacizumab freely.<sup>35</sup>  
41 National guidance (rather than local hospital/clinician policies) is therefore needed in  
42 the UK to direct the choice between bevacizumab and ranibizumab. CATT and  
43 IVAN provide robust data to guide regulators in this decision, demonstrating that  
44 ranibizumab and bevacizumab have comparable effects on vision and similar safety  
45  
46  
47  
48  
49  
50  
51  
52  
53  
54  
55  
56  
57  
58  
59  
60

1  
2  
3  
4  
5  
6 profiles,<sup>6,7</sup> but that [\(based on the current analysis of IVAN\)](#) ranibizumab costs £3.5  
7 million per QALY compared with bevacizumab.  
8  
9

10 The base case analysis found that continuous bevacizumab cost £30,220  
11 (\$47,445) per QALY gained compared with discontinuous bevacizumab, suggesting  
12 that discontinuous bevacizumab is the most cost-effective strategy evaluated in IVAN  
13 if the NHS is willing to pay up to £20,000/QALY gained. However, there remains  
14 substantial uncertainty around this conclusion and there is a 37% chance that  
15 continuous bevacizumab is cost-effective. The finding of non-significantly higher  
16 QALYs with continuous treatment contradicts our prior hypothesis that avoiding  
17 monthly injections might improve quality of life, although the observed difference  
18 could be due to chance. Nonetheless, discontinuous bevacizumab would remain the  
19 most cost-effective strategy even if there were no difference in quality of life between  
20 treatment regimens. Other considerations may affect the choice of anti-VEGF delivery  
21 model. In particular, since discontinuous treatment requires regular clinical review  
22 and access to retinal imaging, it may be more practical to provide treatment every  
23 month, with monitoring restricted to specified points in time (e.g. six or 12 months  
24 after initiation of therapy). Indeed the label for the newest anti-VEGF (aflibercept)  
25 incorporates a limited clinical monitoring regime.<sup>36</sup> The discontinuous treatment  
26 regimen evaluated in the IVAN trial was chosen partly to minimise the possibility of  
27 disadvantage to participants in these groups and partly to minimise the number of  
28 retreatment decisions required. Neither monthly treatment nor treatments given as  
29 blocks of three are used widely in routine practice, although following publication of  
30 IVAN,<sup>16</sup> there appears to be increased interest in the “IVAN regimen”. The cost-  
31 effectiveness of monthly versus intermittent treatment will therefore vary between  
32 treatment centres depending on local costs and clinical practice.  
33  
34  
35  
36  
37  
38  
39  
40  
41  
42  
43  
44  
45

46 Unlike previous studies, our analysis is based on high-quality data from an RCT  
47 [with prospective measurements of costs and quality of life](#), which was powered to  
48 exclude any clinically-meaningful difference in visual acuity ~~and with prospective~~  
49 [measurements of costs and quality of life](#). It therefore provides unequivocally-  
50 unbiased estimates of incremental costs and QALYs. Nevertheless, our analysis  
51 confirms the findings of previous economic evaluations, namely that ranibizumab is  
52 not cost-effective compared with bevacizumab.<sup>11 16 18</sup> We are also (to our knowledge)  
53  
54  
55  
56  
57  
58  
59  
60

1  
2  
3  
4  
5  
6 the first to evaluate the cost-effectiveness of the discontinuous alternative treatment  
7 regimens used in IVAN. In addition to following best practice for trial-based  
8 economic evaluation, this study includes several novel aspects, such as measuring  
9 quality of life after SAEs, excluding chance differences in deaths unrelated to  
10 treatment and allowing for the factorial design by including only large or statistically  
11 significant interactions.  
12  
13  
14

15  
16 The study also estimates the cost of consultations to administer  
17 ranibizumab/bevacizumab and monitor outcomes, which could be used in other  
18 economic evaluations. Micro-costing shows the main drivers of consultation costs  
19 and highlighted substantial variation in costs between centres; this variation means  
20 that the cost-effectiveness of continuous versus discontinuous bevacizumab (but not  
21 ranibizumab versus bevacizumab) will vary between centres. It is important to note  
22 that the costs were calculated to assess incremental cost-effectiveness in IVAN and  
23 should not be used to set the prices at which hospitals are reimbursed. In particular,  
24 they are bottom-up estimates that exclude unpaid overtime and VAT and make  
25 assumptions about overheads and proportion of staff-time spent on patient contacts. In  
26 most settings it is likely that the costs to healthcare commissioners will be higher and  
27 subject to local negotiations with care providers.  
28  
29  
30  
31  
32  
33  
34

35  
36 The base case analysis focused on mortality attributable to study medication and  
37 the costs associated with “expected” SAEs/AEs and excluded other costs. This  
38 reduced the risk that chance differences in resource use not associated with study  
39 medication could distort our conclusions. However, it also means that the  
40 unanticipated increase in the incidence of other SAEs (e.g. gastrointestinal events)  
41 with bevacizumab<sup>16</sup> (which comprised the only difference in SAEs between drugs)  
42 was not taken into account in the costing analysis. However, sensitivity analyses  
43 including the cost of all SAEs/AEs gave the same conclusions. Although hospitals  
44 receive a commercial-in-confidence discount off the list price of ranibizumab and the  
45 price of bevacizumab varies between hospitals, the conclusions were robust to  
46 substantial changes in drug price. The study focused on the randomised trial period of  
47 follow-up in the trial and excluded costs and benefits beyond Year 2. However, since  
48 incremental costs and QALYs remained reasonably stable over time this is unlikely to  
49  
50  
51  
52  
53  
54  
55  
56  
57  
58  
59  
60



1  
2  
3  
4  
5  
6 have affected the conclusions. The analysis also uses data only from IVAN, rather  
7 than synthesising all available evidence.  
8  
9

10  
11 Further research is needed to assess the extent to which the cost-effectiveness  
12 findings generalise to other countries with different relative prices and management of  
13 nAMD and SAEs/AEs. For example, the incidence of SAEs was substantially lower  
14 in IVAN than CATT,<sup>6,7</sup> although sensitivity analyses doubling the impact of SAEs on  
15 costs and QALYs suggested that this did not change the conclusions. The costs of the  
16 two drugs may vary between centres within the UK as hospitals may use different  
17 bevacizumab suppliers or have different discounts on ranibizumab. Nevertheless,  
18 because we collected very detailed information on resource use, policy makers in  
19 other countries can review these data against their own to examine their similarity  
20 and, hence, the applicability of our findings to their setting. Future work combining  
21 data from IVAN with that from other trials, such as CATT,<sup>7</sup> may help reduce  
22 uncertainty and evaluate the extent to which the results can be generalised. However  
23 we believe that our primary finding of ranibizumab representing very poor value for  
24 money compared with bevacizumab does apply throughout the world.  
25  
26  
27  
28  
29  
30

### 31 **Funding and role of study sponsors**

32  
33 The IVAN trial is funded by the National Institute for Health Research (NIHR) Health  
34 Technology Assessment (HTA) programme (project number 07/36/01) and a full  
35 report will be published in *Health Technology Assessment*. Visit the HTA programme  
36 website ([www.hta.ac.uk](http://www.hta.ac.uk)) for further project information. The views and opinions  
37 expressed are those of the authors and do not necessarily reflect those of the HTA  
38 programme, NIHR, the UK National Health Service or the Department of Health. The  
39 funder had no involvement in: the collection, analysis, and interpretation of data; in  
40 the writing of the report; and in the decision to submit the article for publication. The  
41 authors had full access to the data (including statistical reports and tables), can take  
42 responsibility for the integrity of the data and the accuracy of the data analysis and are  
43 responsible for submitting this paper.  
44  
45  
46  
47  
48  
49  
50

### 51 **Competing interest statement**

52  
53 All authors have completed the Unified Competing Interest form at  
54 [www.icmje.org/coi\\_disclosure.pdf](http://www.icmje.org/coi_disclosure.pdf) (available on request from the corresponding  
55  
56  
57  
58  
59  
60

1  
2  
3  
4  
5  
6 author). All authors had financial support from the NIHR for the submitted work. HD,  
7 SW, GA and JR have no financial or non-financial interests relevant to the submitted  
8 work. UC, SH, SD and AL are principal investigators of trials sponsored by Novartis,  
9 the manufacturers of ranibizumab. UC has attended and been remunerated for  
10 attendance at advisory boards for Novartis, Bayer, Neovista, Oraya, Allergan, and  
11 Bausch and Lomb; and her employing institution has received payments from  
12 Novartis, Bayer, Neovista, Oraya, Alcon, and Pfizer. SH has attended and been  
13 remunerated for attendance at advisory boards for and received travel support from  
14 Novartis and Allergan. CR has received an honorarium from Novartis for a lecture.  
15 SD's and AL's employing institutions have received payments from Novartis. SD and  
16 AL have received honoraria from Novartis for lectures. AL has attended and been  
17 remunerated for attendance at advisory boards for Novartis and Bayer; likewise SD  
18 for Bayer and Ely Lilly. BR has received a fee for teaching from Janssen-Cilag.  
19  
20  
21  
22  
23  
24  
25  
26  
27  
28  
29  
30  
31  
32  
33  
34  
35  
36  
37  
38  
39  
40  
41  
42  
43  
44  
45  
46  
47  
48  
49  
50  
51  
52  
53  
54  
55  
56  
57  
58  
59  
60

### **Copyright/licence**

The Corresponding Author has the right to grant on behalf of all authors and does grant on behalf of all authors, a worldwide licence to the Publishers and its licensees in perpetuity, in all forms, formats and media (whether known now or created in the future), to i) publish, reproduce, distribute, display and store the Contribution, ii) translate the Contribution into other languages, create adaptations, reprints, include within collections and create summaries, extracts and/or, abstracts of the Contribution, iii) create any other derivative work(s) based on the Contribution, iv) to exploit all subsidiary rights in the Contribution, v) the inclusion of electronic links from the Contribution to third party material where-ever it may be located; and, vi) licence any third party to do any or all of the above.

### **Authorship statement**

SW, CR, JR, SH, AL, SD, BR and UC conceived, designed and conducted the IVAN trial. HD, SW, GA and JR conceived and designed the economic evaluation, with extensive input from CR, SH and BR. CR supervised collation/cleaning of trial data, while HD, SW and GA collected additional resource use data from centres. HD conducted the economic analysis with help from GA under the supervision of SW. HD drafted the manuscript. All authors edited the manuscript for important intellectual content and approved the final version.

### **Acknowledgements**

The IVAN Study Investigators are listed in Appendix 1 of reference.<sup>1</sup>

We would also like to thank the IVAN participants and the clinicians, nurses and clinic managers who completed resource use questionnaires.

### **Transparency declaration**

The manuscript's guarantor (HD) affirms that the manuscript is an honest, accurate, and transparent account of the study being reported; that no important aspects of the study have been omitted; and that any discrepancies from the study as planned (and, if relevant, registered) have been explained.

### **Data sharing**

No additional data available

### **Ethics statement**

Participants provided written informed consent. A UK National Health Service Research Ethics Committee approved the trial (07/NIR03/37).

### **References**

1. The IVAN Study Investigators, Chakravarthy U, Harding SP, et al. Ranibizumab versus Bevacizumab to Treat Neovascular Age-related Macular Degeneration: One-Year Findings from the IVAN Randomized Trial. *Ophthalmology* 2012;**119**(7):1399-411.
2. Brown DM, Michels M, Kaiser PK, et al. Ranibizumab versus verteporfin photodynamic therapy for neovascular age-related macular degeneration: Two-year results of the ANCHOR study. *Ophthalmology* 2009;**116**(1):57-65.e5.
3. Rosenfeld PJ, Brown DM, Heier JS, et al. Ranibizumab for neovascular age-related macular degeneration. *N Engl J Med* 2006;**355**(14):1419-31.
4. British Medical Association. *British National Formulary 62* (<http://bnf.org/bnf/index.htm>). London: Pharmaceutical Press, September 2011.
5. Mitchell P. A systematic review of the efficacy and safety outcomes of anti-VEGF agents used for treating neovascular age-related macular degeneration: comparison of ranibizumab and bevacizumab. *Current Medical Research & Opinion* 2011;**27**(7):1465-75.
6. Chakravarthy U, Harding SP, Rogers CA, et al. Alternative treatments to inhibit VEGF in age-related choroidal neovascularisation: 2-year findings of the IVAN randomised controlled trial. *Lancet* 2013;**382**(9900):1258-67.
7. Martin DF, Maguire MG, Fine SL, et al. Ranibizumab and Bevacizumab for Treatment of Neovascular Age-related Macular Degeneration: Two-Year Results. *Ophthalmology* 2012;**119**(7):1388-98.

Formatted: Indent: First line: 0"

Formatted: Line spacing: 1.5 lines

- 1  
2  
3  
4  
5  
6 | 8. Martin DF, Maguire MG, Ying GS, et al. Ranibizumab and bevacizumab for  
7 | neovascular age-related macular degeneration. *N Engl J Med*  
8 | 2011;**364**(20):1897-908.
- 9  
10 | 9. Mitchell P, Annemans L, White R, et al. Cost effectiveness of treatments for wet  
11 | age-related macular degeneration. *Pharmacoeconomics* 2011;**29**(2):107-31.
- 12  
13 | 10. Yanagi Y, Aihara Y, Fukuda T, et al. [Cost-effectiveness of ranibizumab,  
14 | photodynamic therapy and pegaptanib sodium in the treatment of neovascular  
15 | age-related macular degeneration in Japanese]. *Nihon Ganka Gakkai Zasshi*  
16 | 2011;**115**(9):825-31.
- 17  
18 | 11. Patel JJ, Mendes MA, Bounthavong M, et al. Cost-utility analysis of bevacizumab  
19 | versus ranibizumab in neovascular age-related macular degeneration using a  
20 | Markov model. *J Eval Clin Pract* 2012;**18**(2):247-55.
- 21  
22 | 12. Gower EW, Cassard SD, Bass EB, et al. A cost-effectiveness analysis of three  
23 | treatments for age-related macular degeneration. *Retina* 2010;**30**(2):212-21.
- 24  
25 | 13. Hernandez-Pastor LJ, Ortega A, Garcia-Layana A, et al. Cost-effectiveness of  
26 | ranibizumab compared with pegaptanib in neovascular age-related macular  
27 | degeneration. *Graefes Archive for Clinical & Experimental Ophthalmology*  
28 | 2010;**248**(4):467-76.
- 29  
30 | 14. Neubauer AS, Holz FG, Sauer S, et al. Cost-effectiveness of ranibizumab for the  
31 | treatment of neovascular age-related macular degeneration in Germany: Model  
32 | analysis from the perspective of Germany's statutory health insurance system.  
33 | *Clinical Therapeutics* 2010;**32**(7):1343-56.
- 34  
35 | 15. Smiddy WE. Economic implications of current age-related macular degeneration  
36 | treatments. *Ophthalmology* 2009;**116**(3):481-7.
- 37  
38 | 16. Stein JD, Newman-Casey PA, Mrinalini T, et al. Cost-effectiveness of  
39 | bevacizumab and ranibizumab for newly diagnosed neovascular macular  
40 | degeneration. *Ophthalmology* 2014;**121**(4):936-45.
- 41  
42 | 17. Fletcher EC, Lade RJ, Adewoyin T, et al. Computerized model of cost-utility  
43 | analysis for treatment of age-related macular degeneration. *Ophthalmology*  
44 | 2008;**115**(12):2192-8.
- 45  
46 | 18. Raftery J, Clegg A, Jones J, et al. Ranibizumab (Lucentis) versus bevacizumab  
47 | (Avastin): modelling cost effectiveness. *Br J Ophthalmol* 2007;**91**(9):1244-6.
- 48  
49 | 19. National Institute for Health and Care Excellence. Guide to the methods of  
50 | technology appraisal 2013. Secondary Guide to the methods of technology  
51 |  
52 |  
53 |  
54 |  
55 |  
56 |  
57 |  
58 |  
59 |  
60 |

appraisal 2013 2013.

<http://www.nice.org.uk/media/D45/1E/GuideToMethodsTechnologyAppraisal2013.pdf>.

20. Drummond MF, Sculpher MJ, Torrance GW, et al. *Methods for the economic evaluation of health care programmes*. 3rd ed. New York: Oxford University Press, 2005.
21. Dakin H, Wordsworth S. Cost-minimisation analysis versus cost-effectiveness analysis, revisited. *Health Econ* 2013;**22**(1):22-34.
22. Briggs AH, O'Brien BJ. The death of cost-minimization analysis? *Health Econ* 2001;**10**(2):179-84.
23. Jonsson B, Weinstein MC. Economic evaluation alongside multinational clinical trials. Study considerations for GUSTO IIB. *Int J Technol Assess Health Care* 1997;**13**(1):49-58.
24. Department of Health. PbR operational guidance and tariffs: 2011-12 tariff information spreadsheet. Secondary PbR operational guidance and tariffs: 2011-12 tariff information spreadsheet 2011. [http://www.dh.gov.uk/en/Publicationsandstatistics/Publications/PublicationsPolicyAndGuidance/DH\\_124356](http://www.dh.gov.uk/en/Publicationsandstatistics/Publications/PublicationsPolicyAndGuidance/DH_124356).
25. Department of Health. National Schedule of Reference Costs 2010-11 for NHS Trusts and PCTs combined. Secondary National Schedule of Reference Costs 2010-11 for NHS Trusts and PCTs combined November 2011. [http://www.dh.gov.uk/prod\\_consum\\_dh/groups/dh\\_digitalassets/documents/digitalasset/dh\\_131148.xls](http://www.dh.gov.uk/prod_consum_dh/groups/dh_digitalassets/documents/digitalasset/dh_131148.xls).
26. Curtis L. Unit Costs of Health and Social Care 2011. Pages 91, 129-150, 177-213. Secondary Unit Costs of Health and Social Care 2011. Pages 91, 129-150, 177-213 2011. <http://www.pssru.ac.uk/archive/pdf/uc/uc2011/uc2011.pdf>.
27. Dolan P. Modeling valuations for EuroQol health states. *Med Care* 1997;**35**(11):1095-108.
28. White IR, Royston P, Wood AM. Multiple imputation using chained equations: Issues and guidance for practice. *Stat Med* 2011;**30**(4):377-99.
29. Royston P. Multiple imputation of missing values: further update of ice, with an emphasis on interval censoring. *Stata Journal* 2007;**7**:445-64.
30. Hallstrom AP, Sullivan SD. On estimating costs for economic evaluation in failure time studies. *Med Care* 1998;**36**(3):433-6.

- 1  
2  
3  
4  
5  
6 | 31. Gray A, Clarke P, Wolstenholme J, et al. *Applied Methods of Cost-Effectiveness*  
7 *Analysis in Health Care* Oxford: Oxford University Press, 2011.  
8
- 9 | 32. National Institute for Health and Clinical Excellence. Social value judgements:  
10 Principles for the development of NICE guidance. Second Edition. Secondary  
11 Social value judgements: Principles for the development of NICE guidance.  
12 Second Edition 2008.  
13 <http://www.nice.org.uk/media/C18/30/SVJ2PUBLICATION2008.pdf>.  
14
- 15 | 33. National Institute for Health and Clinical Excellence. Ranibizumab and  
16 pegaptanib for the treatment of age-related macular degeneration TA155:  
17 Costing template and report. Secondary Ranibizumab and pegaptanib for the  
18 treatment of age-related macular degeneration TA155: Costing template and  
19 report August 2008.  
20 <http://www.nice.org.uk/nicemedia/live/12057/41735/41735.xls>.  
21
- 22 | 34. General Medical Council. Good practice in prescribing and managing medicines  
23 and devices. Secondary Good practice in prescribing and managing medicines  
24 and devices 2013. [http://www.gmc-](http://www.gmc-uk.org/static/documents/content/Prescribing_guidance.pdf)  
25 [uk.org/static/documents/content/Prescribing\\_guidance.pdf](http://www.gmc-uk.org/static/documents/content/Prescribing_guidance.pdf).  
26
- 27 | 35. Curtis LH, Hammill BG, Schulman KA, et al. Risks of mortality, myocardial  
28 infarction, bleeding, and stroke associated with therapies for age-related  
29 macular degeneration.[Erratum appears in Arch Ophthalmol. 2010  
30 Dec;128(12):1623]. Archives of Ophthalmology 2010;**128**(10):1273-9.  
31
- 32 | 36. Bayer Plc. Summary of product characteristics for Eylea 40mg/ml solution for  
33 injection in a vial Secondary Summary of product characteristics for Eylea  
34 40mg/ml solution for injection in a vial 2013.  
35 [http://www.medicines.org.uk/emc/medicine/27224/SPC/Eylea+40mg+ml+sol](http://www.medicines.org.uk/emc/medicine/27224/SPC/Eylea+40mg+ml+solution+for+injection+in+a+vial/)  
36 [ution+for+injection+in+a+vial/](http://www.medicines.org.uk/emc/medicine/27224/SPC/Eylea+40mg+ml+solution+for+injection+in+a+vial/).  
37  
38  
39  
40  
41  
42  
43  
44  
45  
46  
47  
48  
49  
50  
51  
52  
53  
54  
55  
56  
57  
58  
59  
60

**Table 1:** Results of the economic evaluation

|                                          | Total QALYs (95% CI)‡                 | Mean (95% CI) drug cost‡                | Mean (95% CI) administration & monitoring cost | Mean (95% CI) medication/medical service cost‡ | Total cost (95% CI)‡                    | Total net benefits (95% CI)†‡              |
|------------------------------------------|---------------------------------------|-----------------------------------------|------------------------------------------------|------------------------------------------------|-----------------------------------------|--------------------------------------------|
| Discontinuous bevacizumab                | 1.584 (1.538, 1.630)                  | £651 (£605, £698)                       | £1,825 (£1,708, £1,941)                        | £526 (£144, £908)                              | £3,002 (£2,601, £3,403)                 | £28,683 (£27,707, £29,658)                 |
| Continuous bevacizumab                   | 1.604 (1.563, 1.645)                  | £1,065 (£1,048, £1,081)                 | £1,952 (£1,860, £2,043)                        | £585 (£250, £919)                              | £3,601 (£3,259, £3,943)                 | £28,480 (£27,548, £29,412)                 |
| Discontinuous ranibizumab                | 1.582 (1.530, 1.634)                  | £9,229 (£8,584, £9,875)                 | £1,838 (£1,724, £1,952)                        | £432 (£253, £611)                              | £11,500 (£10,798, £12,202)              | £20,142 (£18,963, £21,321)                 |
| Continuous ranibizumab                   | 1.608 (1.565, 1.651)                  | £16,286 (£16,011, £16,562)              | £1,970 (£1,883, £2,057)                        | £334 (£215, £452)                              | £18,590 (£18,258, £18,922)              | £13,576 (£12,769, £14,383)                 |
| Difference: ranibizumab vs. bevacizumab  | Continuous: 0.004 (-0.046, 0.054)     | Continuous: £15,222 (£14,948, £15,495)* | £16 (-£109, £141)                              | Continuous: -£251 (-£604, £102)                | Continuous: £14,989 (£14,522, £15,456)* | Continuous: -£14,904 (-£15,995, -£13,813)* |
|                                          | Discontinuous: -0.002 (-0.064, 0.060) | Discontinuous: £8,578 (£7,932, £9,225)* |                                                | Discontinuous: -£94 (-£514, £326)              | Discontinuous: £8,498 (£7,700, £9,295)* | Discontinuous: -£8,541 (-£9,939, -£7,144)* |
| Difference: continuous vs. discontinuous | Ranibizumab: 0.026 (-0.032, 0.085)    | Ranibizumab: £7,057 (£6,364, £7,750)*   | £130 (£20, £239)*                              | Ranibizumab: -£98 (-£310, £113)                | Ranibizumab: £7,090 (£6,337, £7,844)*   | Ranibizumab: -£6,566 (-£7,861, -£5,271)*   |
|                                          | Bevacizumab: 0.020 (-0.032, 0.071)    | Bevacizumab: £413 (£365, £462)*         |                                                | Bevacizumab: £59 (-£438, £556)                 | Bevacizumab: £599 (£91, £1,107)*        | Bevacizumab: -£203 (-£1,372, £967)         |
| Interaction                              | 0.006 (-0.071, 0.084)                 | £6,643 (£5,949, £7,338)*                | £5 (-£31, £42)                                 | -£157 (-£696, £381)                            | £6,491 (£5,604, £7,379)*                | -£6,363 (-£8,088, -£4,638)*                |

\* Significantly different from zero (p<0.05).

† Net benefits equal QALYs multiplied by ceiling ratio minus costs; the net benefits shown in this table were calculated at a £20,000/QALY ceiling ratio.

‡ Analysis allowed for interactions.



**Figure 1:** Schematic illustrating the assumptions made about the frequency of injection and monitoring consultations within the costing analysis. The consultations required by patients on discontinuous treatment will depend on when they met treatment failure criteria; Patient 2 met the re-treatment criteria at visits 0, 7 and 11.

|                                          | Visit                 | 0 | 1 | 2 | 3 | 4 | 5 | 6 | 7 | 8 | 9 | 10 | 11 |
|------------------------------------------|-----------------------|---|---|---|---|---|---|---|---|---|---|----|----|
| Patient 1:<br>Continuous<br>treatment    | Injection             | ✓ | ✓ | ✓ | ✓ | ✓ | ✓ | X | ✓ | ✓ | ✓ | ✓  | ✓  |
|                                          | Monitoring<br>consult | ✓ |   |   | ✓ |   |   | X |   |   | ✓ |    |    |
|                                          | FFA                   | ✓ |   |   | ? |   |   | X |   |   | ? |    |    |
| Patient 2:<br>Discontinuous<br>treatment | Injection             | ✓ | ✓ | ✓ |   |   |   |   | ✓ | ✓ | ✓ |    | ✓  |
|                                          | Monitoring<br>consult | ✓ |   |   | ✓ | ✓ | X | ✓ | ✓ |   |   | ✓  | ✓  |
|                                          | FFA                   | ✓ |   |   | ? | ? | X | ? | ? |   |   | ?  | ?  |

✓ Relevant consultation cost was applied.

? The cost of fundus fluorescein angiography (FFA) was applied if clinically indicated: for discontinuous patients, this was applied whenever the patient had FFA in the trial; for continuous patients, the proportion of patients having FFA was based on estimated use in routine clinical practice.

X No consultation cost was applied as the participant missed the visit.

1  
2  
3  
4  
5  
6 **Figure 2:** Cost-effectiveness acceptability curve showing the probability that each treatment  
7 is the most cost-effective strategy evaluated in IVAN at a range of ceiling ratios. For example,  
8 at a ceiling ratio of £20,000/QALY gained (shown by the vertical dashed line), there is a 63%  
9 probability that discontinuous bevacizumab is best and a 37% probability that continuous  
10 bevacizumab is best, while the probability that either ranibizumab treatment regimen is best is  
11 approximately 0% (total = 100%).  
12  
13  
14  
15  
16  
17  
18  
19  
20  
21  
22  
23  
24  
25  
26  
27  
28  
29  
30  
31  
32  
33  
34  
35  
36  
37  
38  
39  
40  
41  
42  
43  
44  
45  
46  
47  
48  
49  
50  
51  
52  
53  
54  
55  
56  
57  
58  
59  
60

For peer review only

1  
2  
3  
4  
5  
6 **Figure 3:** Effect of sensitivity analyses on total net benefits for each of the four treatment  
7 arms, assuming a £20,000/QALY ceiling ratio. Treatments that are more cost-effective have  
8 higher net benefits; the treatment furthest to the right is therefore most cost-effective, while  
9 the treatment furthest to the left is the least cost-effective. Error bars represent 95%  
10 confidence intervals. In the analysis “doubling SAE impact”, both the medication/medical  
11 service use cost impact of each SAE on costs and the impact of SAEs on QALYs were was  
12 doubled. The “best case” analysis simultaneously changed several assumptions in favour of  
13 ranibizumab: 50% discount off ranibizumab list price; assuming that 15.9% of bevacizumab  
14 (as occurred in the trial) but no ranibizumab is wasted; assuming that bevacizumab costs  
15 £100 per dose; and including medical service resource-use costs associated with expected  
16 and unexpected AEs and SAEs.  
17  
18  
19  
20  
21  
22  
23  
24  
25  
26  
27  
28  
29  
30  
31  
32  
33  
34  
35  
36  
37  
38  
39  
40  
41  
42  
43  
44  
45  
46  
47  
48  
49  
50  
51  
52  
53  
54  
55  
56  
57  
58  
59  
60

1  
2  
3  
4  
5  
6  
7  
8  
9  
10  
11  
12  
13  
14  
15  
16  
17  
18  
19  
20  
21  
22  
23  
24  
25  
26  
27  
28  
29  
30  
31  
32  
33  
34  
35  
36  
37  
38  
39  
40  
41  
42  
43  
44  
45  
46  
47  
48  
49  
50  
51  
52  
53  
54  
55  
56  
57  
58  
59  
60

|                                          | Visit                 | 0 | 1 | 2 | 3 | 4 | 5 | 6 | 7 | 8 | 9 | 10 | 11 |
|------------------------------------------|-----------------------|---|---|---|---|---|---|---|---|---|---|----|----|
| Patient 1:<br>Continuous<br>treatment    | Injection             | ✓ | ✓ | ✓ | ✓ | ✓ | ✓ | X | ✓ | ✓ | ✓ | ✓  | ✓  |
|                                          | Monitoring<br>consult | ✓ |   |   | ✓ |   |   | X |   |   | ✓ |    |    |
|                                          | FFA                   | ✓ |   |   | ? |   |   | X |   |   | ? |    |    |
| Patient 2:<br>Discontinuous<br>treatment | Injection             | ✓ | ✓ | ✓ |   |   |   |   | ✓ | ✓ | ✓ |    | ✓  |
|                                          | Monitoring<br>consult | ✓ |   |   | ✓ | ✓ | X | ✓ | ✓ |   |   | ✓  | ✓  |
|                                          | FFA                   | ✓ |   |   | ? | ? | X | ? | ? |   |   | ?  | ?  |

90x33mm (300 x 300 DPI)

Peer review only

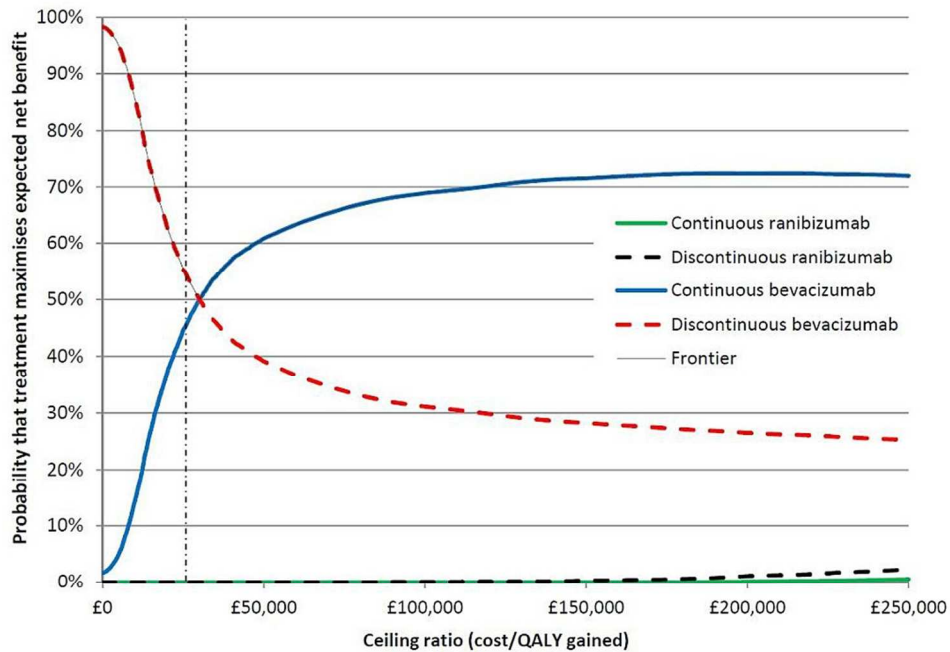

Cost-effectiveness acceptability curve showing the probability that each treatment is the most cost-effective strategy evaluated in IVAN at a range of ceiling ratios. For example, at a ceiling ratio of £20,000/QALY gained (shown by the vertical dashed line), there is a 63% probability that discontinuous bevacizumab is best and a 37% probability that continuous bevacizumab is best, while the probability that either ranibizumab treatment regimen is best is approximately 0% (total = 100%).  
90x65mm (300 x 300 DPI)

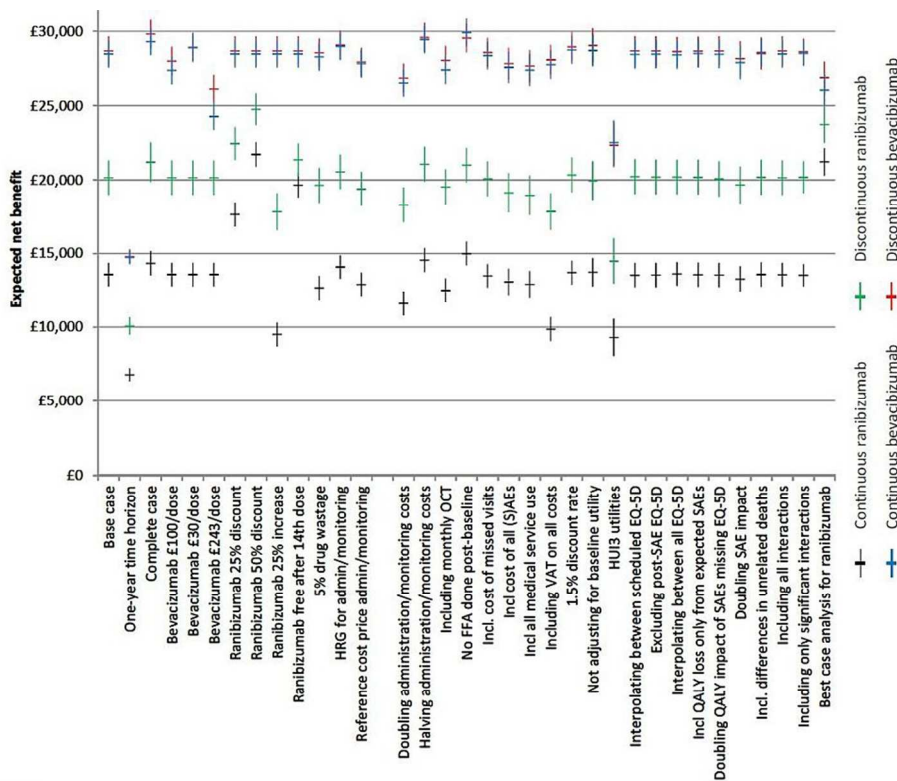

Effect of sensitivity analyses on total net benefits for each of the four treatment arms, assuming a £20,000/QALY ceiling ratio. Treatments that are more cost-effective have higher net benefits; the treatment furthest to the right is therefore most cost-effective, while the treatment furthest to the left is the least cost-effective. Error bars represent 95% confidence intervals. In the analysis “doubling SAE impact”, both the medication/medical service use cost and the impact of SAEs on QALYs were doubled. The “best case” analysis simultaneously changed several assumptions in favour of ranibizumab: 50% discount off ranibizumab list price; assuming that 15.9% of bevacizumab (as occurred in the trial) but no ranibizumab is wasted; assuming that bevacizumab costs £100 per dose; and including medical service use costs associated with expected and unexpected AEs and SAEs.

90x69mm (300 x 300 DPI)

## Appendix: Additional details on the statistical analysis

### *Definition of expected AEs or SAEs*

The base case analysis focused on resource use associated with the study eye or associated with adverse events (AEs) or serious adverse events (SAEs) that were “*expected*”: i.e. previously linked to anti-VEGF treatment. The list of AEs and SAEs continued to be “*expected*” was based on the IVAN trial protocol.<sup>1</sup>

The following were considered to be expected SAEs within the economic evaluation: angina pectoris; arthralgia; cardiac arrest; cardiac failure; cardiovascular disorder; cataract traumatic; cerebrovascular accident; coronary artery bypass; deep vein thrombosis; endophthalmitis; haemorrhage; intraocular pressure increased; left ventricular failure; myocardial infarction; nausea; pulmonary embolism; retinal detachment; retinal pigment epithelial tear; retinal vein occlusion; transient ischaemic attack; upper respiratory tract infection; urinary tract infection; and uveitis.

The following AEs were considered to be expected: angina pectoris; arthralgia; bronchitis; cardiac disorder; cataract; cataract cortical; cataract nuclear; cataract operation; cataract traumatic; conjunctival haemorrhage; cough; eye inflammation; eye irritation; eye pain; haemorrhage; hallucination, visual; headache; hypertension; influenza; intraocular pressure increased; lacrimation increased; nasopharyngitis; nausea; pulmonary embolism; retinal detachment; retinal pigment epithelial tear; retinal vein occlusion; sinusitis; transient ischaemic attack; upper respiratory tract infection; urinary tract infection; uveitis; visual impairment; vitreous detachment; and vitreous floaters.

### *Measurement and valuation of health benefits*

Mixed models were used to estimate the rate at which patients’ EQ-5D utility improves after SAEs or reductions in visual acuity. For patients who experienced an SAE that reduced EQ-5D utility, models assumed that EQ-5D utility fell on the day of the SAE and rose linearly afterwards. Similar profiles have previously been used to model recovery from acute hepatitis<sup>2</sup> and chronic obstructive pulmonary disease exacerbations.<sup>3</sup> We focused on linear recovery profiles to simplify subsequent QALY calculations and as models with quadratic recovery curves did not fit the data as well as those with linear profiles.

Mixed models were estimated on all post-baseline utility measurements using the `xtmixed` command in Stata. A basic model was defined and a pre-specified series of variations on this model were evaluated and included in the base case analysis if they reduced Akaike's information criterion (AIC). The final model divided SAEs into four categories:

- Ocular (including reductions in visual acuity, increased intraocular pressure and all SAEs in the "eye disorders" MedDRA category)
- Cardiovascular (including all SAEs classed as "cardiac disorders", plus cerebrovascular accident, coronary artery bypass, deep vein thrombosis, haemorrhage, pulmonary embolism and transient ischaemic attack)
- Cancer (comprising all events in the "Neoplasms benign, malignant and unspecified" MedDRA category)
- Other (all events not falling into one of the previous four categories)

The model assumed that each type of SAE that patients had experienced reduced the EQ-5D utility of patient  $i$  at time  $j$  by  $\beta_{\text{Event},i}$ , but that EQ-5D utility rose by a certain amount ( $\beta_{\text{EventRecovery}}$ ) with each day that passed after each type of SAE. EQ-5D utility was also assumed to be a function of time since randomisation ( $\text{Time}_{ij}$ ), treatment ( $\text{Bevacizumab}_i$ ,  $\text{Discontinuous}_i$ ) and baseline EQ-5D utility ( $\text{BLEQ5D}_{ij}$ , centred by subtracting the mean baseline EQ-5D utility across all patients [ $\text{MeanBLEQ5D}$ ]):

$$\begin{aligned} \text{EQ-5D}_{ij} = & \text{Constant}_i + \beta_{\text{BL}} \cdot (\text{BLEQ5D}_{ij} - \text{MeanBLEQ5D}) + \beta_{\text{Time},j} \cdot \text{Time}_{ij} \\ & + \beta_{\text{Bevacizumab}} \cdot \text{Bevacizumab}_i + \beta_{\text{Discontinuous}} \cdot \text{Discontinuous}_i \\ & + \beta_{\text{Interact}} \cdot \text{Bevacizumab}_i \cdot \text{Discontinuous}_i \\ & + \beta_{\text{CVD},i} \cdot \text{CVD}_{ij} + \beta_{\text{CVDRecovery}} \cdot \text{TimeSinceCVD}_{ij} \\ & + \beta_{\text{Ocular},i} \cdot \text{Ocular}_{ij} + \beta_{\text{OcularRecovery}} \cdot \text{TimeSinceOcular}_{ij} \\ & + \beta_{\text{Cancer},i} \cdot \text{Cancer}_{ij} + \beta_{\text{CancerRecovery}} \cdot \text{TimeSinceCancer}_{ij} \\ & + \beta_{\text{Other},i} \cdot \text{Other}_{ij} + \beta_{\text{OtherRecovery}} \cdot \text{TimeSinceOther}_{ij} \end{aligned}$$

The slopes estimated in the mixed models (e.g.  $\beta_{\text{CVDRecovery}}$ ) were used alongside the observed EQ-5D measurements for each patient to estimate EQ-5D utility on the day the SAE started and identify the point at which EQ-5D utility returned to the level that would be expected from the EQ-5D utility measurements that were not taken after SAEs (Figure A). However, some post-SAE measurements were higher than would have been expected from the other measurements for that patient (e.g. Figure A); in these cases, we assumed that EQ-



5D utility changed linearly between the routine measurements (Figure A). For patients dying 1-7 days after the latest SAE, EQ-5D utility was assumed to fall linearly to 0 between the date the SAE started and the date of death. Further details will be reported in *Health Technology Assessment*.

**Figure A** Illustration of the utility profile around SAEs. EQ-5D utility measurements after SAEs are shown in white circles, while scheduled measurements are shown in black circles. The EQ-5D utility measurement after this patient's first set of SAEs is higher than would be expected from the baseline and three-month measurements; we therefore assumed that EQ-5D utility rose linearly from baseline to the post-SAE measurement and from this onto the 3-month measurement. EQ-5D utility is lower after their second set of SAEs; here, we use the slope coefficients from the mixed model that show the rate of recovery after the categories of SAE that this patient has experienced to draw a line through the post-SAE 2 measurement and estimate EQ-5D utility on the day SAE 2 starts and the time and EQ-5D utility at which the patient is expected to have recovered from the SAE and returned to the EQ-5D utility trend between visits three and 12. The patient died five days after SAE 3; their EQ-5D utility was therefore assumed to follow the linear trend observed between visit 12 and the value imputed at visit 24 up until the day before SAE 3, and then fall linearly to zero between that date and the date of death.

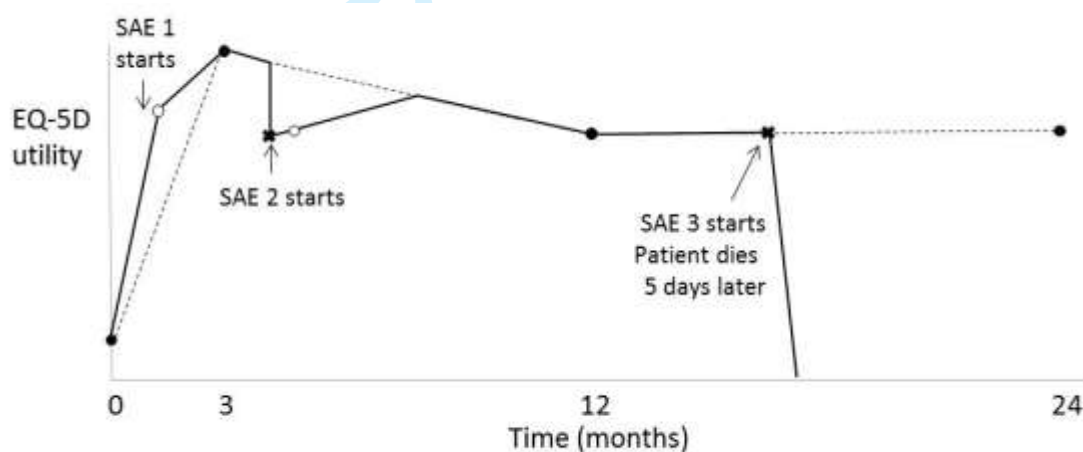

### Statistical methods

The economic evaluation used linear regression models with nonparametric bootstrapping, Kaplan-Meier sample averaging and Rubin's rule to combine the quarterly costs and QALYs accrued by each patient to estimate mean total costs and mean QALYs for each of the four study arms.

Thirty-two ordinary least squares regression models<sup>a</sup> were used to predict the drug costs, administration/monitoring costs, medication/medical service use costs and QALYs accrued in each quarter conditional on treatment regimen and drug. Interactions between drug and treatment regimen were included as additional independent variables for quarters 2-8 if they

<sup>a</sup> 32 = four variables multiplied by eight quarters.

1  
2  
3 were either statistically significant or larger than main effects.<sup>b</sup> Since all patients received  
4 monthly injections at visits 0-2, we assumed no interaction and no impact of treatment  
5 regimen during quarter 1. Analyses of QALYs also controlled for baseline utility to eliminate  
6 any bias that could result from imbalance in baseline utility.<sup>4</sup>  
7  
8  
9

10  
11  
12 We used non-parametric bootstrapping to quantify the uncertainty around quarterly costs  
13 and QALYs, allowing for the skewed, heteroskedastic distributions and correlations between  
14 outcomes.<sup>5</sup> Bootstrapping involved sampling patients with replacement from each  
15 randomised group and estimating all regressions on each bootstrap sample. We also allowed  
16 for uncertainty around multiple imputation by generating 100 imputed datasets, each with  
17 different values drawn from the imputation model. Uncertainty around consultation costs and  
18 the rate of recovery from SAEs was taken into account by randomly sampling values from  
19 the relevant distributions for each imputed data set. Bootstrap samples were drawn 130 times  
20 for each of the 100 imputed datasets, generating 13,000 bootstrap estimates of mean quarterly  
21 costs and QALYs for each of the four study groups, which allow for uncertainty around  
22 imputed utilities, the rate of recovery from SAEs and consultation costs.  
23  
24  
25  
26  
27  
28  
29  
30  
31  
32

33  
34 We also allowed for patients withdrawing early from the trial using Kaplan-Meier sample  
35 averaging, whereby costs and outcomes in each quarter are multiplied by Kaplan-Meier  
36 estimates of the probability of patients remaining alive at the start of each quarter and  
37 summed over all four quarters.<sup>5 6</sup> Kaplan-Meier estimates were adapted to prevent chance  
38 differences in numbers of deaths unrelated to treatment<sup>c</sup> affecting incremental QALYs by  
39 adding the overall probability of deaths unlikely/not related to study medication (averaged  
40 across all four arms) to the probability of potentially-drug related deaths that was observed in  
41 each arm. After weighting quarterly costs and QALYs by the Kaplan-Meier estimate of the  
42 proportion of patients alive at the start of the quarter and discounting costs and QALYs  
43 incurred in Year 2 by 3.5%, quarterly costs and QALYs were added up to give the total cost  
44 and total QALYs accrued in each treatment group over the two-year trial period. The 100  
45  
46  
47  
48  
49  
50  
51  
52

---

53  
54 <sup>b</sup> Analyses were replicated with and without interactions for drug costs, administration/monitoring costs,  
55 medication/medical service use costs and QALYs to identify any interactions that were statistically significant  
56 or had an absolute magnitude larger than either the main effect for treatment regimen or the main effect for  
57 drug. Interactions that were either statistically significant or larger than either main effect were included in the  
58 base case analysis to ensure that the bias associated with omitting qualitative interactions did not change the  
59 conclusions.

60 <sup>c</sup> The five causality groups that study investigators classified all SAEs into were used to categorise deaths into  
those definitely/probably/possibly related to study medication (referred to as potentially drug-related deaths) and  
those unlikely to be/not related to study medication (referred to as unrelated deaths).

1  
2  
3 imputed datasets were combined using Rubin's rule<sup>7</sup> to estimate total and incremental costs,  
4 QALYs and net benefits and their standard errors (SE). Rubin's rule was implemented in  
5 Microsoft Excel, while all other statistical analyses were conducted in Stata version 12.  
6  
7  
8  
9

## 10 **References**

- 11 1. The IVAN Study Investigators, Chakravarthy U, Harding SP, et al. Ranibizumab versus  
12 Bevacizumab to Treat Neovascular Age-related Macular Degeneration: One-Year  
13 Findings from the IVAN Randomized Trial. *Ophthalmology* 2012;**119**(7):1399-411.  
14
- 15 2. Luyten J, Marais C, Hens N, et al. Imputing QALYs from single time point health state  
16 descriptions on the EQ-5D and the SF-6D: a comparison of methods for hepatitis a  
17 patients. *Value in health : the journal of the International Society for*  
18 *Pharmacoeconomics and Outcomes Research* 2011;**14**(2):282-90.  
19
- 20 3. Spencer M, Briggs AH, Grossman RF, et al. Development of an economic model to assess  
21 the cost effectiveness of treatment interventions for chronic obstructive pulmonary  
22 disease. *Pharmacoeconomics* 2005;**23**(6):619-37.  
23
- 24 4. Manca A, Hawkins N, Sculpher MJ. Estimating mean QALYs in trial-based cost-  
25 effectiveness analysis: the importance of controlling for baseline utility. *Health Econ*  
26 2005;**14**(5):487-96.  
27
- 28 5. Gray A, Clarke P, Wolstenholme J, et al. *Applied Methods of Cost-Effectiveness Analysis*  
29 *in Health Care* Oxford: Oxford University Press, 2011.  
30
- 31 6. Hallstrom AP, Sullivan SD. On estimating costs for economic evaluation in failure time  
32 studies. *Med Care* 1998;**36**(3):433-6.  
33
- 34 7. White IR, Royston P, Wood AM. Multiple imputation using chained equations: Issues and  
35 guidance for practice. *Stat Med* 2011;**30**(4):377-99.  
36  
37  
38  
39  
40  
41  
42  
43  
44  
45  
46  
47  
48  
49  
50  
51  
52  
53  
54  
55  
56  
57  
58  
59  
60

**The CHEERS Checklist is part of the CHEERS Statement.**

**The CHEERS Statement has been endorsed and co-published by the following journals:** BJOG: An International Journal of Obstetrics and Gynaecology BMC Medicine 2013; 11:80 BMJ 2013;346:f1049 Clinical Therapeutics 27 March 2013 (Article in Press DOI: 10.1016/j.clinthera.2013.03.003) Cost Effectiveness and Resource Allocation 2013 11:6. The European Journal of Health Economics 2013 Mar 26. [Epub ahead of print] International Journal of Technology Assessment in Health Care Journal of Medical Economics 2013 Mar 25. [Epub ahead of print] Pharmacoeconomics 2013 Mar 26. [Epub ahead of print] Value in Health 2013 March - April;16(2):e1-e5

Checklist taken from: <http://www.equator-network.org/wp-content/uploads/2013/09/CHEERS-Checklist-PDF.pdf>

**CHEERS Checklist**

**Items to include when reporting economic evaluations of health interventions**

| Section/item                    | Item No | Recommendation                                                                                                                                                                          | Reported on page No/ line No |
|---------------------------------|---------|-----------------------------------------------------------------------------------------------------------------------------------------------------------------------------------------|------------------------------|
| <b>Title and abstract</b>       |         |                                                                                                                                                                                         |                              |
| Title                           | 1       | Identify the study as an economic evaluation or use more specific terms such as “cost-effectiveness analysis”, and describe the interventions compared.                                 | Page 1                       |
| Abstract                        | 2       | Provide a structured summary of objectives, perspective, setting, methods (including study design and inputs), results (including base case and uncertainty analyses), and conclusions. | Page 6                       |
| <b>Introduction</b>             |         |                                                                                                                                                                                         |                              |
| Background and objectives       | 3       | Provide an explicit statement of the broader context for the study. Present the study question and its relevance for health policy or practice decisions.                               | Pages 7-8                    |
| <b>Methods</b>                  |         |                                                                                                                                                                                         |                              |
| Target population and subgroups | 4       | Describe characteristics of the base case population and subgroups analysed, including why they were chosen.                                                                            | Pages 6 and 8                |
| Setting and location            | 5       | State relevant aspects of the system(s) in which the decision(s) need(s) to be made.                                                                                                    | Pages 6 and 8                |
| Study perspective               | 6       | Describe the perspective of the study and relate this to the costs being evaluated.                                                                                                     | Page 8                       |
| Comparators                     | 7       | Describe the interventions or strategies being compared and state why they were chosen.                                                                                                 | Page 9                       |
| Time horizon                    | 8       | State the time horizon(s) over which costs and consequences are being evaluated and say why appropriate.                                                                                | Page 8                       |
| Discount rate                   | 9       | Report the choice of discount rate(s) used for costs and outcomes and say why appropriate.                                                                                              | Page 12                      |
| Choice of health outcomes       | 10      | Describe what outcomes were used as the measure(s) of benefit in the evaluation and their relevance for the type of analysis performed.                                                 | Page 9                       |

| Section/item                                           | Item No | Recommendation                                                                                                                                                                                                                                                                                                                                        | Reported on page No/ line No |
|--------------------------------------------------------|---------|-------------------------------------------------------------------------------------------------------------------------------------------------------------------------------------------------------------------------------------------------------------------------------------------------------------------------------------------------------|------------------------------|
| Measurement of effectiveness                           | 11a     | <i>Single study-based estimates:</i> Describe fully the design features of the single effectiveness study and why the single study was a sufficient source of clinical effectiveness data.                                                                                                                                                            | Page 8                       |
|                                                        | 11b     | <i>Synthesis-based estimates:</i> Describe fully the methods used for identification of included studies and synthesis of clinical effectiveness data.                                                                                                                                                                                                | N/A                          |
| Measurement and valuation of preference based outcomes | 12      | If applicable, describe the population and methods used to elicit preferences for outcomes.                                                                                                                                                                                                                                                           | Page 11                      |
| Estimating resources and costs                         | 13a     | <i>Single study-based economic evaluation:</i> Describe approaches used to estimate resource use associated with the alternative interventions. Describe primary or secondary research methods for valuing each resource item in terms of its unit cost. Describe any adjustments made to approximate to opportunity costs.                           | Pages 10-11                  |
|                                                        | 13b     | <i>Model-based economic evaluation:</i> Describe approaches and data sources used to estimate resource use associated with model health states. Describe primary or secondary research methods for valuing each resource item in terms of its unit cost. Describe any adjustments made to approximate to opportunity costs.                           | N/A                          |
| Currency, price date, and conversion                   | 14      | Report the dates of the estimated resource quantities and unit costs. Describe methods for adjusting estimated unit costs to the year of reported costs if necessary. Describe methods for converting costs into a common currency base and the exchange rate.                                                                                        | Page 11                      |
| Choice of model                                        | 15      | Describe and give reasons for the specific type of decision-analytical model used. Providing a figure to show model structure is strongly recommended.                                                                                                                                                                                                | N/A                          |
| Assumptions                                            | 16      | Describe all structural or other assumptions underpinning the decision-analytical model.                                                                                                                                                                                                                                                              | N/A                          |
| Analytical methods                                     | 17      | Describe all analytical methods supporting the evaluation. This could include methods for dealing with skewed, missing, or censored data; extrapolation methods; methods for pooling data; approaches to validate or make adjustments (such as half cycle corrections) to a model; and methods for handling population heterogeneity and uncertainty. | Pages 11-13 and Appendix     |
|                                                        |         |                                                                                                                                                                                                                                                                                                                                                       |                              |

| Section/item                                                         | Item No | Recommendation                                                                                                                                                                                                                                                              | Reported on page No/ line No |
|----------------------------------------------------------------------|---------|-----------------------------------------------------------------------------------------------------------------------------------------------------------------------------------------------------------------------------------------------------------------------------|------------------------------|
| <b>Results</b>                                                       |         |                                                                                                                                                                                                                                                                             |                              |
| Study parameters                                                     | 18      | Report the values, ranges, references, and, if used, probability distributions for all parameters. Report reasons or sources for distributions used to represent uncertainty where appropriate. Providing a table to show the input values is strongly recommended.         | N/A                          |
| Incremental costs and outcomes                                       | 19      | For each intervention, report mean values for the main categories of estimated costs and outcomes of interest, as well as mean differences between the comparator groups. If applicable, report incremental cost-effectiveness ratios.                                      | Table 1, pages 13-16         |
| Characterising uncertainty                                           | 20a     | <i>Single study-based economic evaluation:</i> Describe the effects of sampling uncertainty for the estimated incremental cost and incremental effectiveness parameters, together with the impact of methodological assumptions (such as discount rate, study perspective). | Figures 2 and 3, pages 15-16 |
|                                                                      | 20b     | <i>Model-based economic evaluation:</i> Describe the effects on the results of uncertainty for all input parameters, and uncertainty related to the structure of the model and assumptions.                                                                                 | N/A                          |
| Characterising heterogeneity                                         | 21      | If applicable, report differences in costs, outcomes, or cost-effectiveness that can be explained by variations between subgroups of patients with different baseline characteristics or other observed variability in effects that are not reducible by more information.  | N/A                          |
| <b>Discussion</b>                                                    |         |                                                                                                                                                                                                                                                                             |                              |
| Study findings, limitations, generalisability, and current knowledge | 22      | Summarise key study findings and describe how they support the conclusions reached. Discuss limitations and the generalisability of the findings and how the findings fit with current knowledge.                                                                           | Pages 17-20                  |
| <b>Other</b>                                                         |         |                                                                                                                                                                                                                                                                             |                              |
| Source of funding                                                    | 23      | Describe how the study was funded and the role of the funder in the identification, design, conduct, and reporting of the analysis. Describe other non-monetary sources of support.                                                                                         | Page 3                       |
| Conflicts of interest                                                | 24      | Describe any potential for conflict of interest of study contributors in accordance with journal policy. In the absence of a journal policy, we recommend authors comply with International Committee of Medical Journal Editors recommendations.                           | Page 3                       |
